# Supplementary material for: Genetic overlap between Alzheimer's disease and immune-mediated diseases: An atlas of shared genetic determinants and biological convergence
Source: Research Square preprint supplement (doi:10.21203/rs.3.rs-3346282/v1), 2023-09-28
Supplement: Supplementary file 1 [file 1117791e2bdb03b7fef6406e.xlsx]

## Sheet: Index
Table S1. Summary of the GWAS datasets
Table S2. Genetic correlation between AD and immune diseases
Table S3. Results of cross-trait analysis of AD and immune disease with MiXeR model
Table S4. Distinct genomic loci associated between Alzheimer's disease (AD) and Immune-mediated diseases (ID)
Table S5. Loci shared between one or more immune-mediated diseases and Alzheimer's disease
Table S6. Summary of Significant bivariate local genetic correlation between Alzheimer’s disease (AD) and immune-mediated diseases based on LAVA defined genomic loci.
Table S7. Overlapping SNPs between AD and ID
Table S8. summary of the univariate local genetic correlation between the shared loci of AD and ID
Table S9. summary of the bivariate local genetic correlation between the shared loci of AD and ID
Table S10. summary of the loci shared between AD and more than one ID
Table S11. summary of the Bonferroni Corrected bivariate local genetic correlation between the shared loci of AD and ID
Table S12. summary of local genetic correlation between the ConjFDR results shared loci of AD and ID
Table S13. RDB,CADD scoresof Lead SNPs between AD and ID
Table S14. significant eQTL functinality of lead SNPs in the Loci associated with AD and ID
Table S15. All SNPs jointly associated with AD and ID having a conjFDR <0.10 and an r2≧0.6 with one of the independent significant SNPs with conjFDR<0.01
Table S16. Genes mapped by positional, eQTL, or chromatin interaction mapping of lead SNPs in the loci jointly associated with AD and ID at conjFDR<0.01.
Table S17. Gene Ontology gene-sets significantly associated (after Bonferroni correction) with genes nearest loci shared between AD and ID at conjFDR<0.1
Table S18. summary of mendelian randomization analysis between AD and ID

## Sheet: Table S1
Table S1 Summary of the Alzheimer's disease and Immune-mediated diseases GWAS data
Traits	No. of SNPS	No. of Cases	No. of Controls	Total	pubmedID	Author
Alzheimer's disease	12674020	39918	358140	398058	34493870	Wightman et al.
Immune diseases
Allergic Rhinitis	10321706	22057	267250	289307	31427789	Watanabe et. al.
Asthma	10599055	44301	341521	385822	31427789	Watanabe et. al.
Atopic Dermatitis	11296421	10788	30047	40835	26482879	Watanabe et. al.
Celiac Disease	523399	4533	10750	15283	20190752	Dubois et. al.
Crohn's Disease	9649131	12194	28072	40266	28067908	De Lange et. al.
Hypothyroidism	10154468	13043	231847	244890	31427789	Watanabe et. al.
Primary sclerosing cholangitis	7891603	4796	19955	24751	27992413	Ji et. al.
Rheumatoid Arthritis	8747963	14361	43923	58284	24390342	Okada et. al.
System Lupus Erythematosus	7915252	7219	15991	23210	26502338	Bentham et. al.
Ulcerative Colitis	9666299	12366	33609	45975	28067908	De Lange et. al.
Vitiligo	8721264	4680	39586	44266	27723757	Jin et. al.
Hypertrophic Cardiomyopathy	16383316	808	308346	309154	36653562	Finngen R7

## Sheet: Table S2
Table S2 Genetic correlation between Alzheimer's disease and Immune-mediated diseases with and without LD regions
	Immune diseases	rg (se)	P val
AD (no MHC CHR8 APOE in both Traits).	Allergic Rhinitis	0.0426 (0.0803)	0.6
	Asthma	0.0052 (0.0579)	0.928
	Atopic Dermatitis	-0.0229 (0.1077)	0.83
	Celiac Disease	-0.0114 (0.1208)	0.9247
	Crohn's Disease	0.0006 (0.0201)	0.977
	Hypothyroidism	0.0474 (0.0752)	0.5278
	Primary sclerosing cholangitis	-0.09 (0.08)	0.23
	Rheumatoid Arthritis	-0.1206 (0.0744)	0.1
	System Lupus Erythematosus	-0.0511 (0.1032)	0.62
	Ulcerative Colitis	-0.0281 (0.0239)	0.2315
	Vitiligo	0.0259 (0.0843)	0.75
	Hypertrophic Cardiomyopathy	0.14 (0.18)	0.42
	rg = correlation coefficient
	se = standard error

## Sheet: Table S3
Table S3. Results of cross-trait analysis of AD and ID with MiXeR model
pi1, pi2, p12, are polygenicity specific for trait1, trait2 and shared polygenicity, respectively. nc1@p9, nc2@p9 and nc12@p9 are the number of causal variants specific for trait1, trait2 and the overlap, respectively. rho_beta, correlation of effect sizes within the shared polygenic component. rg, genetic correlation. fraction_concordant_with_shared, fraction of shared variants with concordant e…
trait1	trait2	dice (mean)	dice (std)	pi1 (mean)	pi1 (std)	pi2 (mean)	pi2 (std)	pi12 (mean)	pi12 (std)	nc1@p9 (mean)	nc1@p9 (std)	nc2@p9 (mean)	nc2@p9 (std)	nc12@p9 (mean)	nc12@p9 (std)	rho_zero (mean)	rho_zero (std)	rho_beta (mean)	rho_beta (std)	rg (mean)	rg (std)	fraction_concordant_within_shared (mean)	fraction_concordant_within_shared (std)	best_vs_min_AIC	best_vs_min_BIC	best_vs_max_AIC	best_vs_max_BIC
AD	AR	0.113939	0.03353	5.2652e-06	3.23275e-06	0.00019579	2.9312e-05	1.26681e-05	3.25134e-06	16.7913	10.3096	624.396	93.4795	40.4	10.3689	-0.00326299	0.00145426	0.667352	0.188679	0.131478	0.0240354	0.746309	0.0936984	10.5286	1.06646	16.1149	6.65276
AD	AR	0.113939	0.03353	5.2652e-06	3.23275e-06	0.00019579	2.9312e-05	1.26681e-05	3.25134e-06	16.7913	10.3096	624.396	93.4795	40.4	10.3689	0.000267733	0.00041778	0.667352	0.188679	0.131478	0.0240354	0.746309	0.0936984
AD	Asthma	0.0871778	0.0321607	8.46806e-06	3.28105e-06	0.000188884	1.19813e-05	9.46523e-06	3.59982e-06	27.0056	10.4637	602.372	38.2098	30.1857	11.4802	0.00627286	0.00185734	-0.742282	0.20372	-0.107173	0.0149198	0.213316	0.10463	8.09898	-1.36585	20.1614	10.6966
AD	Asthma	0.0871778	0.0321607	8.46806e-06	3.28105e-06	0.000188884	1.19813e-05	9.46523e-06	3.59982e-06	27.0056	10.4637	602.372	38.2098	30.1857	11.4802	0.00715099	0.000392435	-0.742282	0.20372	-0.107173	0.0149198	0.213316	0.10463
AD	AtD	0.158818	0.121608	1.28072e-05	3.60236e-06	4.19089e-05	1.50043e-05	5.12613e-06	4.07544e-06	40.8435	11.4883	133.652	47.8505	16.3478	12.9971	0.00478487	0.00164692	0.506656	0.266446	0.0635765	0.0285857	0.681184	0.107699	8.76102	-0.824253	31.1952	21.6099
AD	AtD	0.158818	0.121608	1.28072e-05	3.60236e-06	4.19089e-05	1.50043e-05	5.12613e-06	4.07544e-06	40.8435	11.4883	133.652	47.8505	16.3478	12.9971	0.00815955	0.000236228	0.506656	0.266446	0.0635765	0.0285857	0.681184	0.107699
AD	CeD	0.0644295	0.0308955	1.33942e-05	3.56169e-06	0.000116055	1.21575e-05	4.5391e-06	2.29564e-06	42.7156	11.3586	370.112	38.7718	14.4757	7.32107	0.00151091	0.00199072	0.0543908	0.323742	0.00591329	0.0209765	0.51636	0.117374	14.6967	5.15063	34.7337	25.1876
AD	CeD	0.0644295	0.0308955	1.33942e-05	3.56169e-06	0.000116055	1.21575e-05	4.5391e-06	2.29564e-06	42.7156	11.3586	370.112	38.7718	14.4757	7.32107	0.000891394	0.000416472	0.0543908	0.323742	0.00591329	0.0209765	0.51636	0.117374
AD	CD	0.0663108	0.0326317	1.32866e-05	3.73723e-06	0.000116438	1.19111e-05	4.64671e-06	2.39661e-06	42.3724	11.9185	371.334	37.9858	14.8189	7.64307	0.0015454	0.001854	0.0277046	0.291109	0.00608786	0.0199473	0.505142	0.108402	16.4726	6.92215	36.3467	26.7962
AD	CD	0.0663108	0.0326317	1.32866e-05	3.73723e-06	0.000116438	1.19111e-05	4.64671e-06	2.39661e-06	42.3724	11.9185	371.334	37.9858	14.8189	7.64307	0.00111873	0.000395351	0.0277046	0.291109	0.00608786	0.0199473	0.505142	0.108402
AD	Hypothyroidism	0.088747	0.0235676	1.33883e-05	2.36454e-06	7.94304e-05	8.35814e-06	4.54501e-06	1.43862e-06	42.6968	7.54081	253.313	26.6551	14.4946	4.58794	-0.00211818	0.00207536	-0.820918	0.139006	-0.0931329	0.0176628	0.181544	0.0727049	2.56481	-6.89998	47.9496	38.4848
AD	Hypothyroidism	0.088747	0.0235676	1.33883e-05	2.36454e-06	7.94304e-05	8.35814e-06	4.54501e-06	1.43862e-06	42.6968	7.54081	253.313	26.6551	14.4946	4.58794	-0.00183486	0.000352436	-0.820918	0.139006	-0.0931329	0.0176628	0.181544	0.0727049
AD	PSC	0.132007	0.0426375	1.61575e-05	2.42149e-06	6.98508e-06	6.26707e-07	1.77584e-06	6.55292e-07	51.528	7.72241	22.2762	1.99864	5.66335	2.0898	0.000467033	0.0016696	-0.507909	0.200014	-0.0645387	0.0125906	0.321135	0.0897556	7.39391	-1.89957	51.0924	41.799
AD	PSC	0.132007	0.0426375	1.61575e-05	2.42149e-06	6.98508e-06	6.26707e-07	1.77584e-06	6.55292e-07	51.528	7.72241	22.2762	1.99864	5.66335	2.0898	-0.0014981	0.000376838	-0.507909	0.200014	-0.0645387	0.0125906	0.321135	0.0897556
AD	RA	0.14448	0.0434887	1.56523e-05	2.49965e-06	1.12277e-05	7.52148e-07	2.28098e-06	7.19582e-07	49.917	7.97166	35.8063	2.39869	7.27431	2.29483	0.00810253	0.0017887	-0.570855	0.161831	-0.0778548	0.0106758	0.30036	0.0712022	9.83551	0.338965	129.609	120.113
AD	RA	0.14448	0.0434887	1.56523e-05	2.49965e-06	1.12277e-05	7.52148e-07	2.28098e-06	7.19582e-07	49.917	7.97166	35.8063	2.39869	7.27431	2.29483	0.0103512	0.000403509	-0.570855	0.161831	-0.0778548	0.0106758	0.30036	0.0712022
AD	SLE	0.134738	0.0469718	1.59893e-05	2.58585e-06	8.94991e-06	8.12297e-07	1.94397e-06	6.77094e-07	50.9918	8.24657	28.5423	2.59051	6.19953	2.15933	-0.00392735	0.00150119	-0.448886	0.18836	-0.054742	0.0108885	0.346396	0.0755753	10.8483	1.3448	80.0755	70.572
AD	SLE	0.134738	0.0469718	1.59893e-05	2.58585e-06	8.94991e-06	8.12297e-07	1.94397e-06	6.77094e-07	50.9918	8.24657	28.5423	2.59051	6.19953	2.15933	-7.67601e-05	0.000245452	-0.448886	0.18836	-0.054742	0.0108885	0.346396	0.0755753
AD	UC	0.0881868	0.0535517	1.16147e-05	4.68609e-06	0.000117062	6.71838e-06	6.31863e-06	3.97138e-06	37.0405	14.9445	373.325	21.4257	20.1509	12.6652	0.00136337	0.00249603	0.0121175	0.323908	0.00476901	0.0262078	0.506049	0.11407	14.2456	4.6945	28.5725	19.0214
AD	UC	0.0881868	0.0535517	1.16147e-05	4.68609e-06	0.000117062	6.71838e-06	6.31863e-06	3.97138e-06	37.0405	14.9445	373.325	21.4257	20.1509	12.6652	0.0018898	0.000464475	0.0121175	0.323908	0.00476901	0.0262078	0.506049	0.11407
AD	Vitiligo	0.122144	0.0626976	1.26636e-05	3.41349e-06	6.37613e-05	8.56369e-06	5.26967e-06	2.72313e-06	40.3857	10.886	203.342	27.3106	16.8056	8.68437	0.00857168	0.00199162	-0.548629	0.248047	-0.0671252	0.019357	0.30243	0.104678	7.37904	-2.16748	41.5518	32.0052
AD	Vitiligo	0.122144	0.0626976	1.26636e-05	3.41349e-06	6.37613e-05	8.56369e-06	5.26967e-06	2.72313e-06	40.3857	10.886	203.342	27.3106	16.8056	8.68437	0.00581371	0.000383789	-0.548629	0.248047	-0.0671252	0.019357	0.30243	0.104678
AD	HCM	0.00630079	0.00396899	1.02127e-09	1.23332e-09	0.0112064	0.0128913	1.79323e-05	2.66397e-06	0.00325696	0.00393322	35738.5	41112	57.1881	8.49572	-0.00444717	0.00138534	0.999976	2.44389e-05	0.0529055	0.0191076	0.99815	0.00116412	-1.96249	-11.5254	-1.92861	-11.4915
AD	HCM	0.00630079	0.00396899	1.02127e-09	1.23332e-09	0.0112064	0.0128913	1.79323e-05	2.66397e-06	0.00325696	0.00393322	35738.5	41112	57.1881	8.49572	-0.00195883	7.6769e-05	0.999976	2.44389e-05	0.0529055	0.0191076	0.99815	0.00116412

## Sheet: Table S4
Table S4. Shared Loci associated with Alzheimer's disease and Immune-mediated diseases based on the conditional/conjunctional FDR analysis
the below results are based on the conjFDR analysis between Alzheimer's disease and immune diseases. Gene mappping, CADD and RegulomeDB scores are based on FUMA analysis. Chr - Chromosome, SNP - single nucleotide polymorphism, Lead BP - Lead Base Pair, MinBP - Minimum Base Pair, MaxBP - Maximum Base Pair, CADD - Combined Annotation Dependent Depletion, RDB - Regulome DB score, A1 - Allele1, A2 - …
TRAIT1	TRAIT2	locus	Genomic locus	Chr	SNP	Region	cytoband	Lead BP	MinBP	MaxBP	Nearest Gene	Protein coded	Gene related	Distance	ANNOVAR	CADD	RDB	minChrState	commonChrState	A1	A2	Z1	Z2	conjfdr	P1	P2	GWAS_Significant	SNP_Novelty (based on P value)	concordance_effect	SNPs Previously reported trait	SNPs Previously reported from Genomic Risk Loci
AD	AR	1	1	1	rs4233366	1q23.3	chr1 1q23.3	161159147	161159147	161187665	ADAMTS4	Yes	Asthma,AD	0	UTR3	10.46	1f	5	5	T	C	-4.68142	5.442	0.000783091	2.789e-06	5.259e-08	0	1	Discordant	Asthma	Asthma,AR,Atopic
AD	AR	2	2	7	rs17171172	7p14.1	chr7 7p14.1	37872650	37767871	37872650	EPDR1	Yes	AD	0	intronic	1.01	7	1	15	T	C	-3.88281	-4.141	0.0192484	9.86e-05	3.462e-05	0	1	Concordant
AD	AR	3	3	9	rs10993704	9q22.2	chr9 9q22.2	93597359	93597359	93597359	SYK	Yes		0	intronic	1.56	4	4	15	T	C	3.7043	3.812	0.0475466	0.0002108	0.0001378	0	1	Concordant
AD	AR	4	4	19	rs76194	19p13.11	chr19 19p13.11	18630580	18519997	18637194	ELL	Yes	AD	0	intronic	3.465	7	1	7	T	G	-4.69027	4.336	0.0086818	2.679e-06	1.454e-05	0	1	Discordant		SLE,AD
AD	Asthma	5	1	1	rs4233366	1q23.3	chr1 1q23.3	161159147	161159147	161187665	ADAMTS4	Yes		0	UTR3	10.46	1f	5	5	T	C	-4.68142	4.979	0.00169172	2.789e-06	6.404e-07	0	1	Discordant	Asthma	Asthma,AR,Atopic
AD	Asthma	6	2	5	rs2028258	5q22.1	chr5 5q22.1	110482490	110481826	110553497	AC010468.3	No		8451	intergenic	4.468	7	13	15	A	G	-4.31333	-3.902	0.0242843	1.581e-05	9.532e-05	0	1	Concordant
AD	Asthma	7	3	5	rs739954	5q31.3	chr5 5q31.3	139701920	139701920	139714837	HBEGF	Yes	AD	10507	intergenic	2.538	1f	2	15	T	C	4.7	-4.179	0.00919499	2.402e-06	2.933e-05	0	1	Discordant		AD
AD	Asthma	8	4	7	rs4722762	7p15.1	chr7 7p15.1	28178262	28148940	28259233	JAZF1	Yes	asthma,SLE,RA,T1D,Crohns,AR,Atopic,AD	0	intronic	0.831	5	4	5	T	G	-4.46774	7.676	0.00432441	7.586e-06	1.64e-14	1	0	Discordant		Asthma,AR,RA
AD	Asthma	9	5	10	rs2343306	10q23.1	chr10 10q23.1	82230146	82157446	82284512	TSPAN14	Yes	IBD,Crohns,AD,UC,Crohns,RA,Asthma	0	intronic	6.914	5	2	5	T	C	3.80342	-4.054	0.0488486	0.0001393	5.032e-05	0	1	Discordant		IBD,CID,AD
AD	Asthma	10	6	11	rs11234568	11q14.2	chr11 11q14.2	85876222	85873779	85891661	RNU6-560P	No	AD	11845	intergenic	0.47	5	5	15	A	G	5.18812	-3.739	0.0411839	1.965e-07	0.0001845	0	1	Discordant		AD
AD	Asthma	11	7	17	rs28483960	17q21.33	chr17 17q21.33	47432879	47322746	47450775	ZNF652	Yes	Asthma,Atopic,SLE,AD	0	intronic	2.296	7	5	5	T	C	5.15	7.221	0.000186627	2.904e-07	5.148e-13	1	0	Concordant		AR,Asthma,Atopic,AD
AD	Asthma	12	8	22	rs9611460	22q13.2	chr22 22q13.2	41418297	41408754	41713111	Y_RNA	No	AR,Crohns, AD or EA	23203	intergenic	11.71	4	1	1	T	C	-4.06306	-4.229	0.0218666	4.902e-05	2.343e-05	0	1	Concordant		Crohns,AD PRS
AD	AtD	13	1	8	rs897150	8q24.13	chr8 8q24.13	126576702	126573730	126620703	RP11-136O12.2	No		23086	intergenic	2.948		5	15	A	G	-4.26606	-4.40927	0.00854887	1.904e-05	1.05e-05	0	1	Concordant
AD	AtD	14	2	11	rs7480572	11p15.3	chr11 11p15.3	12787048	12719794	12872156	TEAD1	Yes	AD or EA	0	intronic	7.03	5	4	5	T	C	-4.03774	-4.26266	0.0245314	5.703e-05	2.05e-05	0	1	Concordant		AD or EA
AD	AtD	15	3	17	rs2584662	17q21.33	chr17 17q21.33	47470487	47465743	47475549	RP11-81K2.1	No		0	intronic	3.616		5	5	A	C	4.56311	4.47548	0.0040713	5.358e-06	7.73e-06	0	1	Concordant		Asthma, AD or GP
AD	CeD	16	1	1	rs7522462	1q32.1	chr1 1q32.1	200881595	200870754	201024059	C1orf106	Yes	IBD	0	intronic	1.876	5	4	15	A	G	3.91743	3.78308	0.0287208	9.142e-05	0.0001549	0	1	Concordant		IBD,CID,Celiac
AD	CeD	17	2	6	rs2327832	6q23.3	chr6 6q23.3	137973068	137959235	138006504	RP11-95M15.1	No		21528	intergenic	4.522	6	5	15	A	G	3.6063	-7.69545	0.0389143	0.0003288	1.41e-14	1	0	Discordant		IBD,Celiac,SLE,Asthma,RA,IBD,UC
AD	CeD	18	3	17	rs2074404	17q21.31	chr17 17q21.31	44865439	43871982	44865603	WNT3	Yes	Celiac, AD	0	intronic	3.184	1f	5	14	T	G	4	4.05432	0.0111571	6.319e-05	5.028e-05	0	1	Concordant		AD,T1D
AD	CD	19	1	1	rs296530	1q32.1	chr1 1q32.1	200872484	200864267	200881595	C1orf106	Yes		0	intronic	4.979		4	15	T	C	-4.44231	-5.02353	0.00292345	8.93e-06	5.346e-07	0	1	Concordant		IBD,Celiac,CID
AD	CD	20	2	2	rs78572881	2p21	chr2 2p21	43762959	43451957	43855150	THADA	Yes	Crohns,IBD,UC pleiotropy	0	intronic	2.947	6	4	5	T	C	3.7277	6.04636	0.0324269	0.0001901	1.409e-09	1	0	Concordant		CID,IBD
AD	CD	21	3	2	rs744368	2q14.3	chr2 2q14.3	127862653	127840867	127890676	BIN1	Yes	AD	0	intronic	10.52	5	1	2	T	G	-8.86325	4.35938	0.0047274	8.942e-19	1.28e-05	1	0	Discordant		AD
AD	CD	22	4	4	rs13136820	4p14	chr4 4p14	40307564	40301264	40308368	AC195454.1	No		10937	intergenic	3.997	4	2	15	T	C	3.8018	3.92857	0.0260916	0.0001416	8.152e-05	0	1	Concordant	Vitiligo	Vitiligo
AD	CD	23	5	5	rs2963769	5q22.3	chr5 5q22.3	114617284	114552350	114632469	CCDC112	Yes	AD	0	intronic	0.897	6	5	15	T	C	3.67647	-3.81437	0.036369	0.000223	0.0001375	0	1	Discordant
AD	CD	24	6	5	rs6596004	5q23.3	chr5 5q23.3	130547165	130380598	130567793	LYRM7	Yes		6045	intergenic	2.938	5	1	15	T	G	3.63793	-5.55729	0.0418887	0.0002718	2.501e-08	1	0	Discordant
AD	CD	25	7	7	rs10275989	7p15.1	chr7 7p15.1	28159696	28144801	28186775	JAZF1	Yes	asthma,SLE,RA,T1D,Crohns,AR,Atopic,AD	0	intronic	0.326	7	5	15	T	C	3.94118	-4.36527	0.0171879	8.104e-05	1.208e-05	0	1	Discordant		SLE
AD	CD	26	8	7	rs12669163	7p12.2	chr7 7p12.2	50278585	50278585	50278585	AC020743.3	No		34670	intergenic	4.057	6	5	15	A	C	4.15517	-6.14062	0.00863221	3.333e-05	8.657e-10	1	0	Discordant
AD	CD	27	9	8	rs73223431	8p21.2	chr8 8p21.2	27219987	27195121	27238052	PTK2B	Yes	AD,IBD,Crohns	0	intronic	5.891	2b	2	7	T	C	6.63107	-3.66071	0.0432356	2.767e-11	0.0002448	1	0	Discordant		AD,IBD,Crohns
AD	CD	28	10	8	rs2923447	8p11.21	chr8 8p11.21	42439848	42351176	42457590	RP11-503E24.3	No		29511	intergenic	1.128		5	15	T	G	3.58929	-3.65432	0.047043	0.000319	0.0002524	0	1	Discordant
AD	CD	29	11	8	rs1551402	8q24.13	chr8 8q24.13	126532529	126528004	126544973	RP11-136O12.2	No		0	ncRNA_intronic	0.418		5	15	A	G	-3.90164	5.64398	0.0196478	9.663e-05	1.64e-08	1	0	Discordant
AD	CD	30	12	8	rs112641794	8q24.3	chr8 8q24.3	145041943	144979403	145097720	PLEC	Yes	AD	0	intronic	4.002	7	4	5	T	C	-3.87797	3.78363	0.0315392	0.0001078	0.000158	0	1	Discordant		AD
AD	CD	31	13	10	rs2790211	10q21.1	chr10 10q21.1	60003372	59901559	60065351	IPMK	Yes	IBD,Crohns	0	intronic	3.335		5	15	T	C	4	-4.86473	0.0147576	6.644e-05	1.169e-06	0	1	Discordant		IBD,Crohns
AD	CD	32	14	10	rs10748526	10q23.1	chr10 10q23.1	82273079	82222178	82338801	TSPAN14	Yes	IBD,Crohns,UC,Asthma,AD	0	intronic	7.414	1f	4	4	T	C	-4.70619	5.85932		2.814e-06	4.963e-10	1	0	Discordant	AD Japanses	CID,IBD,Crohns,AD
AD	CD	32	14	10	rs9665686	10q23.1	chr10 10q23.1	82302047	82222178	82338801	SH2D4B	Yes	AD in APOE	0	intronic	0.62	5	5	15	T	C	3.65704	3.42222	0.0474396	0.0002729	0.0002801	0	1	Concordant
AD	CD	33	15	14	rs45441198	14q32.33	chr14 14q32.33	104002611	103851272	104010198	TRMT61A	Yes		0	UTR3	6.544	5	4	5	T	C	4.01905	-4.80357	0.0132847	5.783e-05	1.56e-06	0	1	Discordant
AD	CD	34	16	16	rs3764310	16q22.2	chr16 16q22.2	72048332	72032231	72073122	DHODH	Yes		0	intronic	6.442	1f	1	5	T	C	-3.78302	4.62791	0.0276309	0.0001528	3.556e-06	0	1	Discordant
AD	CD	35	17	17	rs62060837	17q21.31	chr17 17q21.31	44152760	43463493	44865603	KANSL1	Yes	AD or EA,AD PRS	0	intronic	2.917	6	4	5	T	G	3.89583	-3.91705	0.0213716	9.895e-05	9.282e-05	0	1	Discordant		AD,AD or EA,T1D
AD	CD	36	18	19	rs271624	19p13.11	chr19 19p13.11	18627953	18519997	18637194	ELL	Yes	AD	0	intronic	3.702	4	2	5	A	G	-4.42857	4.33929	0.00513625	8.912e-06	1.418e-05	0	1	Discordant		SLE,AD
AD	CD	37	19	19	rs479486	19q13.33	chr19 19q13.33	49229323	49206108	49259529	RASIP1	Yes	AD,Atopic	0	intronic	1.268	6	5	5	A	G	4.43137	4.43293	0.00377605	9.423e-06	9.535e-06	0	1	Concordant		Ibd,Crohns,T1D,AD
AD	CD	38	20	20	rs73156368	20q13.2	chr20 20q13.2	54988072	54979828	55025377	CASS4	Yes	AD	0	intronic	4.596	5	1	5	T	C	-6.49735	4.22711	0.0076089	8.226e-11	2.364e-05	1	0	Discordant		AD
AD	CD	39	21	21	rs2094871	21q22.2	chr21 21q22.2	40460859	40458508	40467423	RPL23AP12	No	IBD,UC,Crohns,UC	38634	intergenic	2.31	4	2	15	A	G	4.44954	-4.49432	0.00303571	8.541e-06	7.169e-06	0	1	Discordant		CID,IBD
AD	CD	40	22	22	rs9611555	22q13.2	chr22 22q13.2	41713111	41408754	41854446	ZC3H7B	Yes	Vitiligo, Hypo	0	intronic	0.179	6	4	5	A	G	3.63208	3.8538	0.0427649	0.0002793	0.0001185	0	1	Concordant		Crohns,Asthma,Vitiligo
AD	Hypothyrodism	41	1	2	rs4505478	2q24.2	chr2 2q24.2	160535725	160417540	160670424	AC009961.3	No		0	ncRNA_intronic	1.251	6	5	15	A	G	3.94175	3.964	0.0333957	8.877e-05	7.376e-05	0	1	Concordant		Hypo
AD	Hypothyrodism	42	2	4	rs13136820	4p14	chr4 4p14	40307564	40301264	40308368	AC195454.1	No		10937	intergenic	3.997	4	2	15	T	C	3.8018	-4.248	0.042964	0.0001416	2.16e-05	0	1	Discordant	Vitiligo	Vitiligo
AD	Hypothyrodism	43	3	11	rs3740688	11p11.2	chr11 11p11.2	47380340	47380340	47461263	SPI1	Yes	AD	0	exonic	0.373	3a	1	15	T	G	6.97	-3.952	0.0345232	2.733e-12	7.753e-05	1	0	Discordant	AD	AD
AD	PSC	44	1	2	rs4670688	2p22.2	chr2 2p22.2	37541060	37490367	37561357	PRKD3	Yes	AD	0	intronic	3.669	6	2	5	G	A	3.53125	3.68011	0.0425935	0.0004129	0.000233137	0	1	Concordant		AD
AD	PSC	45	2	6	rs9381604	6p12.3	chr6 6p12.3	47699533	47633098	47708879	RP11-550C4.6	No		0	ncRNA_intronic	6.532	3a	5	15	G	A	3.7459	3.59575	0.0411131	0.0001776	0.000323454	0	1	Concordant		AD
AD	PSC	46	3	12	rs4275659	12q24.31	chr12 12q24.31	123447928	123447928	123895906	ABCB9	Yes	AD or EA	0	intronic	8.385	1d	5	5	T	C	-3.87273	3.77987	0.0207725	0.0001001	0.000156913	0	1	Discordant		AD or EA
AD	PSC	47	4	19	rs874460	19q13.32	chr19 19q13.32	47176752	47154484	47274332	DACT3-AS1	No		0	ncRNA_exonic	0.662	4	4	4	A	C	-4.83673	4.87261	0.000373847	1.276e-06	1.10133e-06	0	1	Discordant		PSC, T1D
AD	PSC	48	5	19	rs646327	19q13.33	chr19 19q13.33	49209851	49168942	49252574	FUT2	Yes	AD, Pediatric autoimmune diseases	643	downstream	0.319	6	4	5	G	A	4.15842	4.3361	0.00557172	3.432e-05	1.45031e-05	0	1	Concordant		AD, immune diseases
AD	PSC	49	6	21	rs9982724	21q22.2	chr21 21q22.2	40461378	40458508	40469520	RPL23AP12	No	Pediatric autoimmune diseases	38115	intergenic	1.652	7	5	15	A	G	4.46789	5.22366	0.0017238	7.79e-06	1.75423e-07	0	1	Concordant		immune diseases
AD	RA	50	1	1	rs2317231	1q23.1	chr1 1q23.1	157686337	157661848	157788521	RP11-367J7.4	No		6903	intergenic	1.641	7	5	15	T	G	-3.9505	4.2148	0.0252847	7.591e-05	2.5e-05	0	1	Discordant	RA	RA,SLE
AD	RA	51	2	1	rs55838263	1q32.1	chr1 1q32.1	200874728	200871876	201024059	C1orf106	Yes	IBD	0	intronic	0.67	4	3	5	A	G	-3.98198	3.66226	0.023972	7.064e-05	0.00025	0	1	Discordant	UC vs RA	IBD,Celiac
AD	RA	52	4	6	rs3736896	6p21.31	chr6 6p21.31	34735883	34569253	34830754	SNRPC	Yes		0	intronic	3.363		4	4	T	C	3.93443	3.4408	0.0441073	8.192e-05	0.00058	0	1	Concordant		AD PRS
AD	RA	53	5	6	rs17264332	6q23.3	chr6 6q23.3	138005515	137959235	138006504	RP11-95M15.1	No		9823	intergenic	5.889	6	5	15	A	G	3.73171	8.87332	0.0471772	0.0001851	7.1e-19	1	0	Concordant		CID,Celiac,SLE,Asthma,IBD,RA
AD	RA	54	6	7	rs4722762	7p15.1	chr7 7p15.1	28178262	28148940	28259233	JAZF1	Yes	asthma,SLE,RA,T1D,Crohns,AR,Atopic,AD	0	intronic	0.831	5	4	5	T	G	-4.46774	4.70813	0.0034735	7.586e-06	2.5e-06	0	1	Discordant		Asthma,AR,RA
AD	RA	55	7	10	rs10749609	10q23.1	chr10 10q23.1	82249752	82220597	82287527	TSPAN14	Yes	IBD,Crohns,UC,Asthma,AD	0	intronic	6.165	5	3	4	A	G	4.46774	3.8674	0.0114438	7.975e-06	0.00011	0	1	Concordant	IBD,pleiotropy	IBD,Asthma,Cid,AD
AD	RA	56	8	11	rs12790721	11q24.1	chr11 11q24.1	123343261	123343261	123385425	LINC01059 (GRAMD1B)	Yes		12142	intergenic	13.66	3a	5	15	T	C	3.75194	3.52095	0.043885	0.0001652	0.00043	0	1	Concordant
AD	SLE	57	1	2	rs268134	2p14	chr2 2p14	65608363	65556528	65667272	SPRED2	Yes	RA,SLE,IBD,Celiac,Crohns,AD	0	intronic	1.317		4	5	A	G	3.9823	-5.21301	0.0166805	6.831e-05	1.85796e-07	0	1	Discordant	SLE, AD or EA	SLE, IBD,AD or EA
AD	SLE	58	2	2	rs62168048	2q21.3	chr2 2q21.3	135081866	135035415	135152287	MGAT5	Yes		0	intronic	4.72	5	2	5	A	G	-4.11304	4.131	0.0128417	3.665e-05	3.61192e-05	0	1	Discordant
AD	SLE	59	3	4	rs16890310	4p15.33	chr4 4p15.33	14366794	14365353	14378658	AC006296.1	No		17952	intergenic	4.901	3a	7	15	A	G	-3.65789	4.12089	0.0466586	0.0002568	3.77418e-05	0	1	Discordant
AD	SLE	60	4	5	rs4958435	5q33.1	chr5 5q33.1	150438284	150434422	150445968	TNIP1	Yes	SLE,RA,AD	0	intronic	6.978	1f	2	4	T	G	4.78788	6.92335	0.000554071	1.563e-06	4.41095e-12	1	0	Concordant
AD	SLE	61	5	6	rs17264332	6q23.3	chr6 6q23.3	138005515	137959235	138006504	RP11-95M15.1	No		9823	intergenic	5.889	6	5	15	A	G	3.73171	-4.38374	0.0366211	0.0001851	1.16657e-05	0	1	Discordant	RA,Asthma,Celiac,IBD	CID,Celiac,SLE,Asthma,IBD,RA
AD	SLE	62	6	10	rs4948365	10q21.2	chr10 10q21.2	61561540	61531607	61574694	CCDC6	Yes		0	intronic	3.695	6	4	5	T	C	-3.71717	-3.78327	0.0423962	0.0001969	0.000154783	0	1	Concordant
AD	SLE	63	7	16	rs11861161	16p11.2	chr16 16p11.2	31329954	31260235	31369803	ITGAM	Yes	SLE	0	intronic	0.232	6	4	15	T	C	-4	-14.2644	0.0151614	6.08e-05	3.64939e-46	1	0	Concordant		SLE
AD	SLE	64	8	17	rs5026246	17q21.31	chr17 17q21.31	43572896	43463493	44568241	PLEKHM1	Yes	AD or EA	4780	intergenic	3.527	7	5	15	T	G	3.87261	4.12693	0.0242307	0.0001087	3.67638e-05	0	1	Concordant		T1D,AD
AD	SLE	65	9	19	rs602662	19q13.33	chr19 19q13.33	49206985	49168942	49250239	FUT2	Yes	Crohns,IBD,T1D,AD	0	exonic	22.5	5	4	5	A	G	3.86	-3.93856	0.0254148	0.0001137	8.19724e-05	0	1	Discordant		IBD,Crohns,T1D
AD	UC	66	1	1	rs148784768	1p36.13	chr1 1p36.13	20186336	20186336	20242739	OTUD3	Yes	UC,IBD,Crohns	22669	intergenic	0.065	7	5	14	A	G	3.84783	-5.14205	0.0374289	0.0001174	2.761e-07	0	1	Discordant
AD	UC	67	2	1	rs296530	1q32.1	chr1 1q32.1	200872484	200864267	200881595	C1orf106	Yes	IBD	0	intronic	4.979		4	15	T	C	-4.44231	-6.33333	0.00439989	8.93e-06	2.362e-10	1	0	Concordant		IBD,Celiac,Crohns,UC,CID
AD	UC	68	3	11	rs117197442	11q22.1	chr11 11q22.1	100135336	100135336	100142344	CNTN5	Yes		0	intronic	3.023	7	9	15	T	C	-3.8449	4.23243	0.0389782	0.0001235	2.319e-05	0	1	Discordant
AD	UC	69	4	16	rs11644964	16p12.2	chr16 16p12.2	23882332	23871206	23962293	PRKCB	Yes	IBD,RA,UC,SLE	0	intronic	2.495	6	4	15	A	G	-3.85437	-4.21951	0.0360432	0.0001122	2.397e-05	0	1	Concordant
AD	UC	70	5	19	rs112445263	19q13.32	chr19 19q13.32	47203356	47176752	47276454	PRKD2	Yes	T1D	0	intronic	1.391	7	4	4	A	C	-4.28049	-3.84685	0.0497318	1.818e-05	0.0001203	0	1	Concordant		T1D
AD	UC	71	6	21	rs9982724	21q22.2	chr21 21q22.2	40461378	40458508	40467423	RPL23AP12	No	IBD,UC,Crohns,UC	38115	intergenic	1.652	7	5	15	A	G	4.46789	-10.5086	0.00392081	7.79e-06	5.8e-26	1	0	Discordant		IBD,Crohns,UC,
AD	Vitiligo	72	1	1	rs6427397	1q23.1	chr1 1q23.1	157705725	157666644	157798000	FCRL2	Yes		9797	intergenic	0.931	6	5	15	T	C	-4.00971	5.848e-05	0.0196673	5.848e-05	8.31e-06	0	1	Discordant		RA,SLE
AD	Vitiligo	73	2	4	rs7668687	4p14	chr4 4p14	40319886	40316298	40337908	AC195454.1	No		0	ncRNA_intronic	4.961	7	5	5	T	C	4.38614	-1.161e-05	0.00478958	1.161e-05	4.32e-08	1	0	Discordant
AD	Vitiligo	74	3	5	rs62380789	5q31.3	chr5 5q31.3	141050575	141026812	141050575	ARAP3	Yes		0	intronic	4.14	5	4	5	A	C	3.94527	-8.106e-05	0.0256973	8.106e-05	3.08e-05	0	1	Discordant
AD	Vitiligo	75	4	7	rs9649710	7p12.2	chr7 7p12.2	50322832	50257634	50323456	AC020743.4	No		7613	intergenic	7.776	4	2	15	A	G	-4.11404	3.767e-05	0.0212209	3.767e-05	2.78e-05	0	1	Discordant		IBD,Crohns,CID
AD	Vitiligo	76	5	22	rs9611460	22q13.2	chr22 22q13.2	41418297	41408754	41713111	Y_RNA	No	AR,Crohns, AD or EA	23203	intergenic	11.71	4	1	1	T	C	-4.06306	-4.902e-05	0.0169736	4.902e-05	3.9e-08	1	0	Concordant		Crohns,AD PRS

## Sheet: Table S5
Table S5. Loci shared between one or more immune-mediated diseases and Alzheimer's disease
TRAIT1	TRAIT2	locus	Genomic locus	Chr	SNP	Lead BP	MinBP	MaxBP	Nearest Gene	Gene related	Distance	ANNOVAR	CADD	RegulomeDB	minChrState	commonChrState	A1	A2	Z1	Z2	conjfdr	P1	P2	GWAS_Significant	SNPs Previously reported trait	SNPs Previously reported from Genomic Risk Loci
AD	AR	1	1	1	rs4233366	161159147	161159147	161187665	ADAMTS4	Asthma,AD	0	UTR3	10.46	1f	5	5	T	C	-4.68142	5.442	0.000783091	2.789e-06	5.259e-08	0	Asthma	Asthma,AR,Atopic
AD	Asthma	5	1	1	rs4233366	161159147	161159147	161187665	ADAMTS4		0	UTR3	10.46	1f	5	5	T	C	-4.68142	4.979	0.00169172	2.789e-06	6.404e-07	0	Asthma	Asthma,AR,Atopic
AD	Asthma	8	4	7	rs4722762	28178262	28148940	28259233	JAZF1	asthma,SLE,RA,T1D,Crohns,AR,Atopic,AD	0	intronic	0.831	5	4	5	T	G	-4.46774	7.676	0.00432441	7.586e-06	1.64e-14	1		Asthma,AR,RA
AD	Asthma	13	9	22	rs9611460	41418297	41408754	41713111	Y_RNA	AR,Crohns, AD or EA	23203	intergenic	11.71	4	1	1	T	C	-4.06306	-4.229	0.0218666	4.902e-05	2.343e-05	0		Crohns,AD PRS
AD	CD	20	1	1	rs296530	200872484	200864267	200881595	C1orf106		0	intronic	4.979		4	15	T	C	-4.44231	-5.02353	0.00292345	8.93e-06	5.346e-07	0		IBD,Celiac,CID
AD	CD	23	4	4	rs13136820	40307564	40301264	40308368	AC195454.1		10937	intergenic	3.997	4	2	15	T	C	3.8018	3.92857	0.0260916	0.0001416	8.152e-05	0	Vitiligo	Vitiligo
AD	Hypothyrodism	44	2	4	rs13136820	40307564	40301264	40308368	AC195454.1		10937	intergenic	3.997	4	2	15	T	C	3.8018	-4.248	0.042964	0.0001416	2.16e-05	0	Vitiligo	Vitiligo
AD	RA	51	6	7	rs4722762	28178262	28148940	28259233	JAZF1	asthma,SLE,RA,T1D,Crohns,AR,Atopic,AD	0	intronic	0.831	5	4	5	T	G	-4.46774	4.70813	0.0034735	7.586e-06	2.5e-06	0		Asthma,AR,RA
AD	RA	47	5	6	rs17264332	138005515	137959235	138006504	RP11-95M15.1		9823	intergenic	5.889	6	5	15	A	G	3.73171	8.87332	0.0471772	0.0001851	7.1e-19	1		CID,Celiac,SLE,Asthma,IBD,RA
AD	SLE	58	5	6	rs17264332	138005515	137959235	138006504	RP11-95M15.1		9823	intergenic	5.889	6	5	15	A	G	3.73171	-4.38374	0.0366211	0.0001851	1.16657e-05	0	RA,Asthma,Celiac,IBD	CID,Celiac,SLE,Asthma,IBD,RA
AD	UC	75	2	1	rs296530	200872484	200864267	200881595	C1orf106	IBD	0	intronic	4.979		4	15	T	C	-4.44231	-6.33333	0.00439989	8.93e-06	2.362e-10	1		IBD,Celiac,Crohns,UC,CID
AD	Vitiligo	84	5	22	rs9611460	41418297	41408754	41713111	Y_RNA	AR,Crohns, AD or EA	23203	intergenic	11.71	4	1	1	T	C	-4.06306	-4.902e-05	0.0169736	4.902e-05	3.9e-08	1		Crohns,AD PRS

## Sheet: Table S6
Table S6. Summary of Significant bivariate local genetic correlation between Alzheimer’s disease (AD) and immune-mediated diseases based on LAVA defined genomic loci.
Trait1	Trait2	# univariate significant Loci	# Concordant Loci	CI0.975=1	# bivariate significant Loci	# Concordant Loci	CI0.975=1	# bivariate Bonferroni adjusted Loci	#Concordant Loci	CI0.975=1
AD	AR	747	65	409	115	64	104	6	3	6
AD	Asthma	786	53	431	108	52	98	3	0	3
AD	AtD	758	63	34	94	61	26	6	5	2
AD	CeD	757	42	451	73	38	65	2	2	2
AD	CD	251	5	100	17	5	13	2	1	2
AD	Hypothyroidism	782	58	445	116	58	105	4	3	4
AD	PSC	984	74	435	129	71	108	2	1	2
AD	RA	523	39	197	55	37	43	1	1	1
AD	SLE	850	60	467	117	59	100	5	2	5
AD	UC	233	12	100	21	12	16	3	1	3
AD	Vitiligo	884	73	431	141	70	118	5	3	4
Abbreviations: Allergic rhinitis (AR), atopic dermatitis (AtD), celiac disease (CeD), Crohn’s disease (CD), Primary sclerosing cholangitis (PSC), rheumatoid arthritis (RA), systemic lupus erythematosus (SLE), ulcerative colitis (UC), confidence interval (CI). N = number of positively correlated loci.

## Sheet: Table S7
Table S7. Summary of Significant bivariate local genetic correlation between Alzheimer’s disease (AD) and immune-mediated diseases based on conjFDR results loci.
Trait1	Trait2	# univariate significant Loci	# Concordant Loci	CI0.975=1	# bivariate significant Loci	# Concordant loci	CI0.975=1	# bivariate Bonferroni adjusted Loci	# Concordant Loci	CI0.975=1
AD	AR	4	2	3	2	1	2	1	0	1
AD	Asthma	5	0	2	1	0	1	1	0	1
AD	AtD	1	0	0	0	0	0	0	0	0
AD	CeD	1	0	0	0	0	0	0	0	0
AD	CD	12	8	0	0	0	0	0	0	0
AD	Hypothyroidism	2	1	1	1	1	1	1	1	1
AD	PSC	4	2	2	1	0	1	1	0	1
AD	RA	3	3	1	1	1	0	1	1	0
AD	SLE	8	2	2	4	1	2	2	1	2
AD	UC	2	1	0	0	0	0	0	0	0
AD	Vitiligo	3	2	0	1	0	0	1	0	0

## Sheet: LAVA_overall
Trait1	Trait2	LAVA univariate significant Loci	Concordant Loci	CI0.975=1	LAVA bivariate significant Loci	Concordant Loci	CI0.975=1	LAVA bivariate Bonferroni adjusted Loci	Concordant Loci	CI0.975=1
AD	AR	747	65	409	115	64	104	6	3	6
AD	Asthma	786	53	431	108	52	98	3	0	3
AD	AtD	758	63	34	94	61	26	6	5	2
AD	CeD	757	42	451	73	38	65	2	2	2
AD	CD	251	5	100	17	5	13	2	1	2
AD	Hypothyroidism	782	58	445	116	58	105	4	3	4
AD	PSC	984	74	435	129	71	108	2	1	2
AD	RA	523	39	197	55	37	43	1	1	1
AD	SLE	850	60	467	117	59	100	5	2	5
AD	UC	233	12	100	21	12	16	3	1	3
AD	Vitiligo	884	73	431	141	70	118	5	3	4

## Sheet: Table S8
Table S8. summary of the univariate local genetic correlation between the shared loci of AD and ID
phen1	phen2	chr	start	stop	n.snps	n.pcs	rho	rho.lower	rho.upper	r2	r2.lower	r2.upper	p	concordant	CI		LAVA_Univariate
AD	AR	1	10539	1376204	1725	222	0.654824	-0.1239	1	0.428795	0	1	0.0899565	0	1
AD	AR	1	2215496	2983519	1983	283	-0.0124172	-0.78022	0.74461	0.000154186	0	0.97696	0.966308	0	0
AD	AR	1	2983520	3582047	1852	287	-0.0573615	-1	0.84638	0.00329035	0	1	0.867359	0	1
AD	AR	1	4773404	5362404	2077	296	-0.189066	-0.83702	0.30307	0.0357459	0	0.73029	0.402765	0	0
AD	AR	1	5362405	6136814	2158	299	0.238816	-0.36194	1	0.0570333	0	1	0.383869	0	1
AD	AR	1	8580988	9475966	2133	322	-0.19229	-0.60225	0.18162	0.0369753	0	0.36352	0.299609	0	0
AD	AR	1	9475967	10753427	2714	287	-0.494513	-1	-0.0145	0.244543	0.00437	1	0.0452731	0	1
AD	AR	1	10753428	11709173	2203	280	0.0403328	-0.60041	0.70733	0.00162673	0	0.67091	0.878857	0	0
AD	AR	1	11709174	13481025	3049	311	0.045738	-0.7404	0.88048	0.00209197	0	0.99971	0.884706	0	0
AD	AR	1	13481026	14720131	3101	335	0.0064715	-0.64958	0.67117	4.19e-05	0	0.6431	0.981338	0	0
AD	AR	1	14720132	15755230	3296	358	0.652673	0.09604	1	0.425982	0.01362	1	0.0250901	1	1
AD	AR	1	15755231	16732168	2606	249	0.310917	-0.28974	1	0.0966695	0	1	0.287289	0	1
AD	AR	1	16732169	17557746	1259	202	0.279946	-0.27064	0.98035	0.07837	0	0.97436	0.287633	0	0
AD	AR	1	18427821	19238924	2605	340	0.36909	0.01945	0.82813	0.136228	0.00243	0.6858	0.0429965	1	0
AD	AR	1	20556203	21416121	2171	253	0.289227	-0.2097	0.99064	0.0836525	0	0.98661	0.233974	0	0
AD	AR	1	21416122	22145629	2081	263	-0.29982	-0.80117	0.11639	0.0898921	0	0.64233	0.147029	0	0
AD	AR	1	23907046	25885138	3833	362	0.743854	-0.09762	1	0.553319	0	1	0.0792147	0	1
AD	AR	1	29188427	30405182	2783	326	-0.340656	-1	0.16366	0.116046	0	1	0.170974	0	1
AD	AR	1	38474037	40200950	3839	352	-0.663782	-1	-0.08704	0.440607	0.01289	1	0.0291718	0	1
AD	AR	1	54771294	55727134	2916	333	-0.109966	-0.66561	0.35227	0.0120926	0	0.46278	0.617048	0	0
AD	AR	1	55727135	56799636	3523	294	-1	-1	-0.2754	1	0.08095	1	3.28e-05	0	1
AD	AR	1	58387484	59889045	3994	339	-0.36842	-1	0.40692	0.135733	0	1	0.304752	0	1
AD	AR	1	59889046	61377615	3348	324	0.22872	-0.23919	0.75176	0.0523127	0	0.56977	0.305734	0	0
AD	AR	1	67761891	68633860	2188	278	0.174497	-0.35498	0.81256	0.0304494	0	0.67414	0.492036	0	0
AD	AR	1	68633861	69438909	2132	235	-0.0937904	-0.86005	0.61602	0.00879664	0	0.88505	0.752217	0	0
AD	AR	1	70992906	72513119	3260	269	-0.0970776	-0.67879	0.44575	0.00942406	0	0.51917	0.690841	0	0
AD	AR	1	76097248	76977915	2636	233	1	0.22441	1	1	0.0574	1	0.018743	1	1
AD	AR	1	87667573	88656689	2243	319	0.397317	-0.08617	1	0.157861	0	1	0.108878	0	1
AD	AR	1	89753965	90941549	2518	309	-0.0862891	-0.57672	0.37737	0.00744581	0	0.35183	0.691912	0	0
AD	AR	1	90941550	91870059	2432	281	-0.31877	-1	0.32989	0.101614	0	1	0.304624	0	1
AD	AR	1	99425001	100269207	2470	265	0.112754	-0.36455	0.61269	0.0127134	0	0.39659	0.613802	0	0
AD	AR	1	109271450	110224230	2298	282	-0.453867	-1	0.08142	0.205995	0	1	0.0904767	0	1
AD	AR	1	110224231	111134062	2136	312	-0.11841	-1	0.75179	0.014021	0	1	0.733005	0	1
AD	AR	1	113418038	114664387	2376	284	0.274468	-0.39618	1	0.0753326	0	1	0.378229	0	1
AD	AR	1	114664388	116207297	4236	336	0.487308	-0.13262	1	0.237469	0	1	0.120352	0	1
AD	AR	1	116207298	117046311	2239	250	0.12215	-1	1	0.0149205	0	1	0.780561	0	1
AD	AR	1	154685546	156813845	3472	373	0.693365	-0.05499	1	0.480755	0	1	0.0766528	0	1
AD	AR	1	156813846	158081627	3586	340	0.499615	-0.01349	1	0.249615	0	1	0.056868	0	1
AD	AR	1	158900370	159882515	2528	266	0.206236	-0.64754	1	0.0425332	0	1	0.55636	0	1
AD	AR	1	159882516	161054076	2955	334	-0.343448	-1	0.25497	0.117957	0	1	0.237978	0	1
AD	AR	1	161054077	161945442	2046	244	-0.763777	-1	-0.31419	0.583355	0.09886	1	0.00173168	0	1
AD	AR	1	163141863	163854567	1999	195	0.0581862	-0.64916	0.83888	0.00338563	0	0.91644	0.842932	0	0
AD	AR	1	165553813	166458031	2252	282	0.111258	-0.69695	1	0.0123784	0	1	0.733421	0	1
AD	AR	1	167163955	168179086	2466	302	-0.505235	-1	-0.09314	0.255262	0.00965	1	0.0185678	0	1
AD	AR	1	171044256	172465153	3660	282	-0.45386	-1	0.12017	0.205989	0	1	0.114685	0	1
AD	AR	1	172465154	173582511	2132	284	0.332386	-0.00348	0.69525	0.110481	0	0.48337	0.0477049	0	0
AD	AR	1	193575517	194365688	2492	186	-0.0704483	-1	0.82031	0.00496297	0	1	0.841049	0	1
AD	AR	1	195161236	196179110	2547	244	-0.283885	-1	0.7202	0.0805909	0	1	0.488519	0	1
AD	AR	1	200134006	201067952	2512	262	-0.166979	-1	0.76654	0.0278821	0	1	0.656146	0	1
AD	AR	1	202583885	204092537	3602	367	-0.00350427	-1	1	1.23e-05	0	1	0.992463	0	1
AD	AR	1	204092538	205009623	2654	292	-0.0248506	-0.47989	0.41693	0.000617552	0	0.27888	0.90588	0	0
AD	AR	1	205009624	205917548	2530	284	0.243897	-0.49128	1	0.059486	0	1	0.442563	0	1
AD	AR	1	211082893	212347582	3892	288	0.32311	-0.47702	1	0.1044	0	1	0.364849	0	1
AD	AR	1	212347583	213958292	4115	342	0.0996083	-0.63755	0.94235	0.00992182	0	1	0.74271	0	0
AD	AR	1	215825792	216658126	2225	277	-0.559392	-1	-0.03674	0.31292	0.00587	1	0.041568	0	1
AD	AR	1	216658127	217352165	2059	274	-0.642415	-1	-0.11859	0.412697	0.0179	1	0.0199234	0	1
AD	AR	1	217352166	218563960	3827	301	0.245114	-0.56988	1	0.060081	0	1	0.485555	0	1
AD	AR	1	220073133	220978151	2555	239	0.21776	-0.53865	1	0.0474192	0	1	0.503149	0	1
AD	AR	1	220978152	221856864	2418	229	-0.11698	-0.75479	0.43122	0.0136843	0	0.59406	0.645599	0	0
AD	AR	1	230227248	231287764	3796	349	-0.495264	-1	0.01875	0.245287	0	1	0.0664063	0	1
AD	AR	1	231287765	232177704	2184	287	-0.511934	-1	0.14886	0.262076	0	1	0.116883	0	1
AD	AR	1	232177705	232954942	2429	306	-0.0337504	-0.9707	0.82323	0.00113909	0	1	0.917635	0	0
AD	AR	1	233639474	234365796	2487	263	-0.29496	-1	0.38625	0.0870014	0	1	0.343402	0	1
AD	AR	1	234365797	235097113	2144	309	-0.285692	-0.77742	0.12396	0.0816197	0	0.60438	0.166692	0	0
AD	AR	1	238704858	239332148	2409	218	0.0397097	-0.5473	0.65394	0.00157686	0	0.54768	0.876802	0	0
AD	AR	1	241033585	241813534	2293	304	-0.842625	-1	-0.13937	0.710017	0.0254	1	0.0249347	0	1
AD	AR	1	241813535	242417923	1900	250	-0.123054	-0.62714	0.3502	0.0151424	0	0.41128	0.583178	0	0
AD	AR	1	242417924	243048003	2034	249	0.239256	-0.17644	0.70559	0.0572437	0	0.49786	0.242285	0	0
AD	AR	1	243048004	244723196	3112	340	-0.0120881	-0.58245	0.53817	0.000146123	0	0.46172	0.96039	0	0
AD	AR	2	1875061	2680063	2469	299	0.49008	-0.01543	1	0.240178	0	1	0.059714	0	1
AD	AR	2	2680064	3314202	2156	296	0.0875487	-0.41632	0.63295	0.00766478	0	0.45436	0.702397	0	0
AD	AR	2	4766970	5568653	1837	221	0.754728	0.15298	1	0.569614	0.02667	1	0.0166995	1	1
AD	AR	2	5568654	6306606	2455	292	-0.617599	-1	-0.09026	0.381428	0.01065	1	0.0236563	0	1
AD	AR	2	6306607	7108208	2022	271	0.0924066	-0.26702	0.46738	0.00853897	0	0.22932	0.596741	0	0
AD	AR	2	7966710	8978798	2281	312	0.116068	-0.20417	0.46045	0.0134717	0	0.21367	0.479178	0	0
AD	AR	2	20064518	21084898	2711	330	-0.27759	-1	0.43663	0.0770562	0	1	0.402113	0	1
AD	AR	2	28819511	29627932	2315	274	0.83996	0.25487	1	0.705533	0.06709	1	0.00729828	1	1
AD	AR	2	29627933	30575619	2744	301	-0.427021	-0.92079	-0.04432	0.182347	0.00407	0.84785	0.0284583	0	0
AD	AR	2	30575620	31457418	2957	289	0.0765317	-0.42915	0.63735	0.00585711	0	0.4399	0.745133	0	0
AD	AR	2	44104111	45189468	2856	296	-0.0125476	-0.8057	0.75922	0.000157442	0	1	0.96749	0	0
AD	AR	2	45850048	46499326	2185	346	0.0514478	-0.85127	1	0.00264688	0	1	0.879634	0	1
AD	AR	2	52494112	53032976	2087	167	-0.348483	-1	0.59838	0.121441	0	1	0.403075	0	1
AD	AR	2	54688235	55663336	3174	277	-0.538267	-1	0.01887	0.289731	0	1	0.0670501	0	1
AD	AR	2	64696090	65938002	3172	342	-0.154852	-0.68792	0.32823	0.023979	0	0.4838	0.493086	0	0
AD	AR	2	65938003	67224027	3245	322	0.0657537	-1	1	0.00432354	0	1	0.878216	0	1
AD	AR	2	71385814	72160302	2269	278	0.335099	-0.24257	1	0.112291	0	1	0.225143	0	1
AD	AR	2	72160303	73544290	2320	275	-0.102389	-1	1	0.0104836	0	1	0.823263	0	1
AD	AR	2	79900056	80737811	2315	317	-0.494004	-1	0.2537	0.24404	0	1	0.178099	0	1
AD	AR	2	88547313	91860961	1397	163	-0.884195	-1	-0.11743	0.781801	0.02385	1	0.0271795	0	1
AD	AR	2	101556800	102494487	2282	274	-0.264028	-1	0.31583	0.0697106	0	1	0.328163	0	1
AD	AR	2	105120579	106546524	4188	361	0.000213613	-0.692	0.6732	4.56e-08	0	0.72459	0.99939	0	0
AD	AR	2	110097869	112644828	3043	331	0.348927	-0.0091	0.77238	0.12175	0	0.59658	0.0562588	0	0
AD	AR	2	121073753	122026817	2406	313	-0.211242	-0.96326	0.38775	0.0446233	0	0.95145	0.445965	0	0
AD	AR	2	126754028	127895644	3472	299	-0.0740682	-0.55595	0.3534	0.0054861	0	0.35391	0.702127	0	0
AD	AR	2	134359060	135160197	2264	271	-0.15372	-0.63819	0.27994	0.0236298	0	0.41417	0.471031	0	0
AD	AR	2	135160198	137061003	3285	206	0.202253	-0.27183	0.7357	0.0409061	0	0.54247	0.362562	0	0
AD	AR	2	142494981	143259780	2246	249	-0.261694	-1	0.61713	0.0684838	0	1	0.493771	0	1
AD	AR	2	143259781	144503688	2891	278	0.289272	-0.14995	0.88088	0.0836785	0	0.77906	0.183246	0	0
AD	AR	2	144503689	145977920	2239	314	0.256807	-0.39945	1	0.06595	0	1	0.385704	0	1
AD	AR	2	145977921	147252196	2806	291	-0.162946	-1	0.48725	0.0265514	0	1	0.564587	0	1
AD	AR	2	160200380	161432089	3537	264	0.673708	0.14787	1	0.453882	0.02466	1	0.01664	1	1
AD	AR	2	164702313	165917788	2548	267	0.348895	-0.15621	1	0.121728	0	1	0.156668	0	1
AD	AR	2	168437446	169224445	2195	273	0.127187	-0.31614	0.62763	0.0161766	0	0.41067	0.549658	0	0
AD	AR	2	169224446	170155561	2558	301	-0.189135	-0.96193	0.42025	0.035772	0	0.98676	0.501988	0	0
AD	AR	2	170865766	171566482	2310	291	0.378738	-0.05043	0.92444	0.143443	0	0.85459	0.0831152	0	0
AD	AR	2	174118390	174927563	2158	311	-0.232006	-0.76239	0.21583	0.0538268	0	0.58463	0.27752	0	0
AD	AR	2	176734751	178149981	3441	350	0.184228	-0.80229	1	0.03394	0	1	0.633983	0	1
AD	AR	2	182307878	183352290	2607	268	0.0124102	-0.55778	0.56637	0.000154013	0	0.45517	0.959493	0	0
AD	AR	2	191051955	193033982	4047	343	-0.226546	-1	0.38288	0.051323	0	1	0.423031	0	1
AD	AR	2	195300251	196446299	3223	222	-0.0545456	-1	0.88846	0.00297523	0	1	0.878735	0	1
AD	AR	2	196446300	198140350	4107	287	1	0.44148	1	1	0.19491	1	0.000700686	1	1
AD	AR	2	198140351	199654969	2479	255	0.291006	-0.12562	0.84846	0.0846842	0	0.71989	0.173945	0	0
AD	AR	2	199654970	201324132	3079	275	-0.430567	-1	0.13821	0.185388	0	1	0.134089	0	1
AD	AR	2	202504863	203639686	2258	291	-0.126333	-1	1	0.01596	0	1	0.757038	0	1
AD	AR	2	203639687	205038119	2904	276	0.342569	-0.147	1	0.117353	0	1	0.15903	0	1
AD	AR	2	210842458	212520453	4120	324	0.952897	0.28762	1	0.908013	0.08325	1	0.00745685	1	1
AD	AR	2	224123080	224938731	2158	249	0.0468377	-0.413	0.52084	0.00219377	0	0.32188	0.823715	0	0
AD	AR	2	224938732	226242842	3719	296	0.457963	-0.32148	1	0.20973	0	1	0.223491	0	1
AD	AR	2	227557842	228812485	4015	317	0.526375	0.08916	1	0.27707	0.01066	1	0.0198811	1	1
AD	AR	2	228812486	229764918	2503	267	-0.28598	-1	0.24835	0.0817846	0	1	0.268073	0	1
AD	AR	2	231847387	233352722	3927	326	0.624179	-0.0286	1	0.3896	0	1	0.0594629	0	1
AD	AR	2	233352723	234115092	2055	257	0.0430639	-0.66723	0.78004	0.0018545	0	0.89677	0.881705	0	0
AD	AR	2	234945578	235625789	2492	299	0.264616	-0.20444	0.85694	0.0700215	0	0.73641	0.255873	0	0
AD	AR	2	237194298	238185482	2719	290	-0.279516	-0.96044	0.27119	0.0781294	0	0.9338	0.280367	0	0
AD	AR	2	240325601	241113279	2732	327	-0.0810694	-0.50321	0.32068	0.00657224	0	0.27058	0.666943	0	0
AD	AR	2	241113280	241910366	2897	309	-0.11261	-0.5759	0.32039	0.012681	0	0.34177	0.589983	0	0
AD	AR	3	2140012	3128152	3342	377	-0.620598	-1	-0.1599	0.385141	0.02765	1	0.0118974	0	1
AD	AR	3	4109394	4835083	2198	315	0.00332306	-0.6222	0.62667	1.1e-05	0	0.58847	0.98993	0	0
AD	AR	3	4835084	5496182	1863	325	0.211543	-0.18885	0.69698	0.0447506	0	0.48606	0.288288	0	0
AD	AR	3	9970732	11226367	3663	364	-0.117346	-0.91822	0.52612	0.0137701	0	0.96021	0.678379	0	0
AD	AR	3	11226368	11997658	2039	275	0.0362852	-0.52343	0.59854	0.00131661	0	0.46372	0.882435	0	0
AD	AR	3	14312008	15150876	2466	322	0.249374	-0.13569	0.69101	0.0621875	0	0.4823	0.184136	0	0
AD	AR	3	16084006	17182494	3316	322	-0.0768071	-0.80063	0.57203	0.00589934	0	0.81727	0.779584	0	0
AD	AR	3	17182495	19030988	4167	303	-0.226482	-0.94138	0.3295	0.0512939	0	0.89865	0.385499	0	0
AD	AR	3	20754843	21790867	3813	314	0.52543	-0.24171	1	0.276076	0	1	0.174948	0	1
AD	AR	3	24270190	25516193	4119	358	0.0929439	-0.50935	0.73632	0.00863857	0	0.59544	0.721238	0	0
AD	AR	3	25516194	26905340	3610	297	-0.818228	-1	-0.28092	0.669497	0.07966	1	0.00576171	0	1
AD	AR	3	27614909	28649810	2443	254	0.0194104	-0.51551	0.56664	0.000376764	0	0.41355	0.935758	0	0
AD	AR	3	35913034	36840136	2781	268	0.315957	-0.53672	1	0.0998289	0	1	0.387498	0	1
AD	AR	3	54074845	54892586	2205	307	0.0992765	-0.47753	0.72446	0.00985583	0	0.57254	0.697249	0	0
AD	AR	3	54892587	55616625	2184	306	0.112374	-0.35132	0.60448	0.012628	0	0.37382	0.605555	0	0
AD	AR	3	56954879	58557718	3948	284	-0.486358	-1	0.33201	0.236544	0	1	0.213227	0	1
AD	AR	3	71223282	72334704	3053	375	-0.107892	-0.89958	0.55262	0.0116407	0	0.89113	0.711247	0	0
AD	AR	3	104878978	106174685	3950	302	0.0533325	-0.74038	0.9218	0.00284435	0	1	0.863824	0	0
AD	AR	3	112408514	113657665	3598	280	-0.466341	-1	0.33858	0.217474	0	1	0.221318	0	1
AD	AR	3	118903054	119759983	2330	251	0.196744	-0.29653	0.78997	0.0387082	0	0.63849	0.40576	0	0
AD	AR	3	125992651	127495173	4268	333	0.112918	-0.42572	0.69699	0.0127505	0	0.52339	0.641233	0	0
AD	AR	3	137372142	138693846	2472	273	0.100299	-0.58624	0.89965	0.01006	0	0.9387	0.733985	0	0
AD	AR	3	141034638	141898978	2197	264	-0.282767	-0.66374	0.06842	0.0799574	0	0.44055	0.107982	0	0
AD	AR	3	147358244	148638308	3280	308	0.105779	-0.59897	0.94224	0.0111893	0	1	0.72615	0	0
AD	AR	3	149998412	151131307	2603	305	-0.629943	-1	-0.23761	0.396828	0.05646	1	0.00240778	0	1
AD	AR	3	156795411	157633700	2176	201	0.437096	-0.221	1	0.191053	0	1	0.173544	0	1
AD	AR	3	168972663	170174578	2880	300	-0.923666	-1	-0.08427	0.853159	0.02249	1	0.0357982	0	1
AD	AR	3	170174579	171134849	2224	287	0.136964	-0.78429	1	0.0187592	0	1	0.714738	0	1
AD	AR	3	178110323	179372165	3174	284	0.796432	0.19128	1	0.634303	0.04102	1	0.0137862	1	1
AD	AR	3	181424324	183203155	3385	342	0.986844	0.36896	1	0.973862	0.13614	1	0.00259831	1	1
AD	AR	3	185709997	186602045	2223	329	0.00247428	-0.52402	0.51327	6.12e-06	0	0.37023	0.991606	0	0
AD	AR	3	186602046	187939199	4118	389	-0.08488	-0.59354	0.38488	0.00720461	0	0.37951	0.697925	0	0
AD	AR	3	187939200	189451805	3811	367	0.0440963	-0.53933	0.66076	0.00194449	0	0.54466	0.863986	0	0
AD	AR	3	195196790	195710290	976	201	0.0954261	-1	1	0.00910614	0	1	0.824141	0	1
AD	AR	3	196383153	197147990	2209	295	-0.219788	-0.90214	0.30468	0.0483066	0	0.82401	0.384043	0	0
AD	AR	4	1529268	2468935	2342	284	-0.178672	-0.64275	0.22794	0.0319236	0	0.42144	0.361075	0	0
AD	AR	4	3549230	4266178	2158	295	-0.0729767	-0.52252	0.34787	0.00532559	0	0.29899	0.713269	0	0
AD	AR	4	5051835	5972709	3538	331	0.943593	0.14199	1	0.890369	0.02922	1	0.0237866	1	1
AD	AR	4	5972710	7135819	3589	391	-0.654922	-1	0.05687	0.428923	0	1	0.06912	0	1
AD	AR	4	10370667	11050119	2198	251	0.100903	-0.315	0.55262	0.0101814	0	0.32218	0.609869	0	0
AD	AR	4	11050120	12209028	3896	334	0.0737885	-0.72727	1	0.00544475	0	1	0.823289	0	1
AD	AR	4	12209029	13127576	3046	277	-0.0732901	-0.80562	0.58331	0.00537143	0	0.78099	0.796152	0	0
AD	AR	4	13127577	14395886	3982	338	0.327997	-0.09966	0.85268	0.107582	0	0.72706	0.125521	0	0
AD	AR	4	14395887	14967147	1900	198	-0.216182	-1	0.50169	0.0467346	0	1	0.504035	0	1
AD	AR	4	17290237	18753263	4281	295	0.351777	-0.44692	1	0.123747	0	1	0.337164	0	1
AD	AR	4	23858351	24764724	2298	314	-0.435035	-1	0.13709	0.189256	0	1	0.12463	0	1
AD	AR	4	24764725	25832018	3035	323	-0.520066	-1	0.35412	0.270469	0	1	0.19657	0	1
AD	AR	4	32746821	33640822	2052	164	0.495576	0.12192	0.97305	0.245595	0.0155	0.94683	0.0128433	1	0
AD	AR	4	35993839	36671801	2207	196	0.33992	-0.28812	1	0.115545	0	1	0.243874	0	1
AD	AR	4	37880861	38984838	3630	332	0.165076	-0.09864	0.42835	0.0272499	0	0.18349	0.209915	0	0
AD	AR	4	38984839	39820061	2068	234	-0.48705	-0.95759	-0.12229	0.237217	0.01593	0.91697	0.0113815	0	0
AD	AR	4	39820062	40590541	2142	300	0.212487	-0.23326	0.72393	0.0451509	0	0.52799	0.32785	0	0
AD	AR	4	41360938	42189251	2192	207	0.654259	-0.19754	1	0.428055	0	1	0.118981	0	1
AD	AR	4	54659779	55681701	2384	304	0.360777	-0.18227	1	0.13016	0	1	0.18813	0	1
AD	AR	4	55681702	57103100	4219	319	-0.102476	-0.75812	0.48669	0.0105013	0	0.66996	0.702201	0	0
AD	AR	4	57103101	58011085	2812	271	-0.218078	-1	0.87163	0.0475582	0	1	0.602781	0	1
AD	AR	4	67616363	68742859	3080	260	-0.219067	-1	0.73074	0.0479903	0	1	0.570057	0	1
AD	AR	4	82655624	84003062	3577	286	0.812835	-0.03075	1	0.660701	0	1	0.0543103	0	1
AD	AR	4	90236972	91309863	3199	236	-0.486763	-1	0.12525	0.236938	0	1	0.117285	0	1
AD	AR	4	94757266	96183801	3804	290	1	0.23361	1	1	0.05804	1	0.00588535	1	1
AD	AR	4	113916003	115306149	3443	316	0.0996216	-0.62981	0.95556	0.00992447	0	1	0.745869	0	0
AD	AR	4	115306150	116204703	2635	193	0.386828	-0.45419	1	0.149636	0	1	0.315207	0	1
AD	AR	4	122655435	123768693	2594	241	-0.340688	-0.75034	-0.00391	0.116068	0.00165	0.56301	0.0476353	0	0
AD	AR	4	125486536	126476842	2967	264	0.357116	-0.09906	1	0.127532	0	1	0.123734	0	1
AD	AR	4	147161043	148462208	2899	270	0.619349	0.05653	1	0.383594	0.0086	1	0.0355404	1	1
AD	AR	4	148462209	149998528	3498	328	0.430545	-0.18893	1	0.185369	0	1	0.147637	0	1
AD	AR	4	157597310	159176073	3785	286	-0.0325639	-0.78491	0.68811	0.0010604	0	0.84378	0.912492	0	0
AD	AR	4	174470207	175295842	2112	293	-0.423543	-1	0.22627	0.179389	0	1	0.176489	0	1
AD	AR	4	177129679	178314527	3718	309	-0.688289	-1	0.02454	0.473742	0	1	0.0548342	0	1
AD	AR	4	179932392	180540877	2304	210	0.375636	-0.25397	1	0.141102	0	1	0.218651	0	1
AD	AR	4	183603893	184338584	2061	288	-0.766944	-1	-0.19342	0.588203	0.03873	1	0.0120478	0	1
AD	AR	4	185483263	186232882	2322	279	0.735228	0.20145	1	0.54056	0.04291	1	0.00958588	1	1
AD	AR	4	189899574	191043880	2592	270	-0.202598	-0.81176	0.32837	0.0410459	0	0.67432	0.407111	0	0
AD	AR	5	598321	1206609	1492	225	0.66833	-0.00595	1	0.446664	0	1	0.0526825	0	1
AD	AR	5	2106886	2960068	3309	338	0.218317	-0.30453	0.87548	0.0476624	0	0.7743	0.383525	0	0
AD	AR	5	2960069	3677595	3019	306	-0.635681	-1	-0.15065	0.40409	0.02431	1	0.0111629	0	1
AD	AR	5	4636543	5828694	3556	348	-0.191985	-1	0.46889	0.0368583	0	1	0.510901	0	1
AD	AR	5	8079416	9203855	3699	262	0.319973	-0.27117	1	0.102383	0	1	0.275828	0	1
AD	AR	5	9203856	10549029	3621	363	0.149852	-0.20388	0.52407	0.0224555	0	0.27612	0.391848	0	0
AD	AR	5	10549030	11850850	3660	339	0.364621	-0.04534	0.89795	0.132949	0	0.80631	0.0802028	0	0
AD	AR	5	13608148	14910295	3327	331	0.35597	0.05279	0.71014	0.126715	0.00413	0.5043	0.0254775	1	0
AD	AR	5	16592320	17803477	3205	361	0.0542582	-0.69694	0.90871	0.00294395	0	1	0.858253	0	0
AD	AR	5	31679465	32727914	2876	341	0.352136	-0.18115	1	0.124	0	1	0.178299	0	1
AD	AR	5	33971057	35157146	3093	268	-0.28879	-1	0.47534	0.0833997	0	1	0.400491	0	1
AD	AR	5	52139774	52837225	2191	231	-0.298071	-1	0.28165	0.0888466	0	1	0.280977	0	1
AD	AR	5	55221399	55968966	2273	325	-0.171755	-0.91479	0.33835	0.0294998	0	0.90624	0.470371	0	0
AD	AR	5	57895013	58721458	2557	287	-0.121589	-0.6193	0.32579	0.0147839	0	0.39527	0.580767	0	0
AD	AR	5	58721459	59868567	2183	240	0.631596	0.10044	1	0.398914	0.01289	1	0.024422	1	1
AD	AR	5	67096192	68006993	2346	308	0.0729278	-1	1	0.00531847	0	1	0.854953	0	1
AD	AR	5	75239303	75959515	2032	266	-0.153992	-0.82937	0.42087	0.0237136	0	0.71346	0.559841	0	0
AD	AR	5	100594082	101575367	2953	181	-0.596407	-1	-0.11838	0.355701	0.01659	1	0.021074	0	1
AD	AR	5	106389389	107265911	2274	293	0.604362	0.08798	1	0.365253	0.01203	1	0.0245297	1	1
AD	AR	5	109606906	110819517	2863	252	-0.283259	-0.95998	0.08525	0.0802356	0	0.92975	0.135663	0	0
AD	AR	5	124109486	125131720	3198	330	0.060232	-0.66864	0.88145	0.00362789	0	1	0.841052	0	0
AD	AR	5	126992837	128067414	2555	250	0.591382	-0.07566	1	0.349733	0	1	0.0882913	0	1
AD	AR	5	135344944	136949853	3912	331	0.331544	-0.31141	1	0.109921	0	1	0.271928	0	1
AD	AR	5	141253831	142532956	3416	340	0.537451	0.10828	1	0.288853	0.01306	1	0.0163204	1	1
AD	AR	5	142532957	143605908	2724	289	0.183858	-0.29264	0.74043	0.0338036	0	0.55573	0.416021	0	0
AD	AR	5	147180172	148662214	3857	324	0.281765	-0.28704	1	0.0793913	0	1	0.306742	0	1
AD	AR	5	148662215	149850203	2969	349	0.180441	-0.53275	1	0.0325588	0	1	0.546696	0	1
AD	AR	5	151892618	152878627	2538	250	0.268776	-0.82998	1	0.0722407	0	1	0.528822	0	1
AD	AR	5	153734495	154599750	2271	290	0.51287	-0.06914	1	0.263036	0	1	0.0789715	0	1
AD	AR	5	156345452	157191081	2684	238	-0.0673772	-1	0.83634	0.00453969	0	1	0.847931	0	1
AD	AR	5	158484776	159663733	3075	307	0.157459	-0.5147	1	0.0247935	0	1	0.591465	0	1
AD	AR	5	159663734	160519049	2545	321	-0.545204	-1	0.03444	0.297247	0	1	0.0590921	0	1
AD	AR	5	161478178	162386027	2038	234	-0.355424	-1	0.37159	0.126326	0	1	0.295849	0	1
AD	AR	5	166863414	168342743	3520	381	0.433857	-0.15942	1	0.188232	0	1	0.13659	0	1
AD	AR	5	173606996	174662885	3123	351	-0.232872	-0.8952	0.27345	0.0542296	0	0.82022	0.336459	0	0
AD	AR	5	174662886	176180301	2945	352	-0.388546	-1	0.08649	0.150968	0	1	0.102261	0	1
AD	AR	5	176180302	177659902	2713	294	-0.0450267	-0.43248	0.32564	0.0020274	0	0.20151	0.800312	0	0
AD	AR	5	178595253	179794710	3674	377	-0.184348	-1	0.80642	0.0339841	0	1	0.63707	0	1
AD	AR	5	179794711	180902886	2690	294	-0.361612	-1	0.31203	0.130763	0	1	0.255462	0	1
AD	AR	6	63979	1380679	3587	370	0.212607	-0.4124	1	0.0452018	0	1	0.449162	0	1
AD	AR	6	2746532	3964072	3578	358	-0.0955086	-0.73984	0.4854	0.00912189	0	0.58784	0.706318	0	0
AD	AR	6	7808324	9020710	3583	281	-0.558383	-1	0.22278	0.311791	0	1	0.152626	0	1
AD	AR	6	9020711	10416550	3809	321	-0.913251	-1	-0.44066	0.834027	0.19418	1	0.000304002	0	1
AD	AR	6	16566883	17391994	2092	293	0.8106	0.30177	1	0.657072	0.09143	1	0.00267237	1	1
AD	AR	6	20418021	21295864	2537	257	-0.443689	-1	0.10457	0.19686	0	1	0.0990783	0	1
AD	AR	6	23192338	23939306	2564	289	0.28664	-0.58429	1	0.0821624	0	1	0.438972	0	1
AD	AR	6	24950380	25684629	2922	241	0.0866477	-0.57138	0.8205	0.00750783	0	0.80014	0.755735	0	0
AD	AR	6	30715007	31106493	2750	134	0.181375	-0.32685	0.89009	0.0328968	0	0.8381	0.458676	0	0
AD	AR	6	31106494	31250556	1962	51	0.274626	-0.34007	1	0.0754196	0	1	0.344086	0	1
AD	AR	6	31250557	31320268	1191	37	0.472946	-0.01634	1	0.223678	0	1	0.0624691	0	1
AD	AR	6	31320269	31427209	1598	48	0.0526726	-0.42377	0.54686	0.0027744	0	0.34755	0.80992	0	0
AD	AR	6	31427210	32208901	2879	204	0.27016	0.02484	0.52326	0.0729865	0.00156	0.2738	0.0307498	1	0
AD	AR	6	32208902	32454577	2654	59	0.236067	-0.05727	0.5467	0.0557275	0	0.29888	0.113235	0	0
AD	AR	6	32454578	32539567	50	26	-0.0484914	-0.40761	0.31086	0.00235142	0	0.1825	0.779363	0	0
AD	AR	6	32539568	32586784	408	41	0.407494	0.20042	0.61276	0.166051	0.04017	0.37547	0.000325163	1	0
AD	AR	6	32586785	32629239	447	89	0.181583	-0.00882	0.37073	0.0329724	0	0.13744	0.064775	0	0
AD	AR	6	32629240	32682213	739	33	0.474406	0.23469	0.72664	0.225061	0.05508	0.52801	0.000707199	1	0
AD	AR	6	32682214	32897998	2067	88	0.220991	-0.12429	0.60328	0.0488371	0	0.36401	0.197177	0	0
AD	AR	6	32897999	33194975	2255	137	0.293264	-0.15244	0.8925	0.086004	0	0.79921	0.184064	0	0
AD	AR	6	33194976	33864262	2593	229	-0.245443	-0.6345	0.11805	0.0602423	0	0.40286	0.178129	0	0
AD	AR	6	39785908	40778401	3292	303	-0.236378	-0.67867	0.13188	0.0558746	0	0.46059	0.203932	0	0
AD	AR	6	45408422	46430701	2381	305	-0.439558	-1	0.11349	0.193212	0	1	0.112425	0	1
AD	AR	6	51826424	52598879	2340	284	-0.76764	-1	-0.03537	0.589272	0.01047	1	0.0438831	0	1
AD	AR	6	52598880	53425492	2243	245	0.635799	-0.04963	1	0.40424	0	1	0.0680173	0	1
AD	AR	6	65759862	66445495	2141	176	0.20954	-0.91657	1	0.0439072	0	1	0.625646	0	1
AD	AR	6	67559695	68547494	3813	220	-0.0660637	-1	0.93103	0.00436441	0	1	0.859775	0	1
AD	AR	6	68547495	69294227	2815	224	-0.0115786	-0.95536	0.99312	0.000134064	0	1	0.973936	0	0
AD	AR	6	70363349	71610787	3550	299	0.102881	-0.6133	0.99114	0.0105846	0	1	0.735415	0	0
AD	AR	6	73170169	74401506	3125	280	-0.531704	-1	0.04696	0.282709	0	1	0.0749868	0	1
AD	AR	6	79859904	80693927	2346	255	-0.327336	-1	0.69681	0.107149	0	1	0.454794	0	1
AD	AR	6	83571954	85038134	2757	277	-1	-1	-0.28122	1	0.08167	1	0.00142955	0	1
AD	AR	6	89974268	91097024	2383	301	-0.160474	-0.72471	0.3346	0.0257518	0	0.53533	0.497284	0	0
AD	AR	6	104951345	106053915	2239	274	-0.057615	-1	0.83715	0.00331949	0	1	0.866403	0	1
AD	AR	6	106053916	107309327	3732	349	-0.170922	-0.71819	0.29369	0.0292144	0	0.52837	0.436567	0	0
AD	AR	6	107309328	109043244	3769	320	0.1768	-0.40291	0.87186	0.0312583	0	0.83892	0.503606	0	0
AD	AR	6	109043245	110647842	3932	273	0.0475158	-0.63786	0.79648	0.00225775	0	0.81684	0.865458	0	0
AD	AR	6	111363444	112342873	2335	228	-0.116692	-1	0.7399	0.0136171	0	1	0.739033	0	1
AD	AR	6	144791456	145778282	2680	209	-0.097699	-0.72449	0.46597	0.00954509	0	0.58176	0.705694	0	0
AD	AR	6	145778283	147015882	2353	206	0.187984	-0.53378	1	0.035338	0	1	0.563293	0	1
AD	AR	6	152376500	153082361	2143	263	0.0744498	-0.56931	0.7613	0.00554278	0	0.68275	0.782838	0	0
AD	AR	6	153082362	153791461	2042	213	-0.291791	-0.88254	0.1809	0.0851421	0	0.77888	0.212648	0	0
AD	AR	6	156762741	158220143	3278	357	0.334926	-0.19909	1	0.112175	0	1	0.20702	0	1
AD	AR	6	159604053	160583918	2848	291	-0.251949	-1	0.81049	0.0634785	0	1	0.562868	0	1
AD	AR	6	161371015	162254229	2731	317	-0.316277	-1	0.41617	0.100031	0	1	0.343119	0	1
AD	AR	6	165835954	166853325	3259	325	0.113896	-0.45573	0.76532	0.0129722	0	0.63102	0.659299	0	0
AD	AR	6	166853326	167714865	2896	295	-0.369747	-1	0.17329	0.136713	0	1	0.159686	0	1
AD	AR	7	15064	617319	1089	197	-0.372719	-1	0.56814	0.13892	0	1	0.373551	0	1
AD	AR	7	4139432	4938442	2920	335	-0.675412	-1	-0.14608	0.456181	0.02275	1	0.0149371	0	1
AD	AR	7	7926501	8718351	2690	302	-0.217174	-0.52742	0.06845	0.0471647	0	0.27817	0.140562	0	0
AD	AR	7	8718352	9225106	1952	256	-0.369844	-1	0.18183	0.136784	0	1	0.172404	0	1
AD	AR	7	20122180	21390644	3773	353	-0.27359	-0.58844	0.02103	0.0748513	0	0.34627	0.0689002	0	0
AD	AR	7	23106681	24151099	3007	274	0.0476418	-0.66958	0.8163	0.00226974	0	0.93799	0.867053	0	0
AD	AR	7	24151100	24894119	2479	254	0.258287	-0.57048	1	0.0667119	0	1	0.477296	0	1
AD	AR	7	24894120	25671575	2381	308	0.127617	-0.50634	0.88038	0.016286	0	0.85978	0.648603	0	0
AD	AR	7	31730555	32460228	2362	253	-0.348881	-1	0.467	0.121718	0	1	0.346169	0	1
AD	AR	7	33159278	34114532	2371	267	-0.18299	-1	0.81547	0.0334854	0	1	0.637249	0	1
AD	AR	7	36507691	37981936	4316	353	0.355061	-0.18186	1	0.126068	0	1	0.176966	0	1
AD	AR	7	40261241	41415925	2238	277	0.106542	-0.31469	0.55757	0.0113513	0	0.32374	0.602186	0	0
AD	AR	7	47253455	48363585	3311	346	0.233697	-0.32366	0.93103	0.0546142	0	0.87562	0.37709	0	0
AD	AR	7	48984626	49632426	2308	232	-0.159553	-0.71299	0.33331	0.0254572	0	0.51021	0.497957	0	0
AD	AR	7	49632427	50894508	3576	294	-0.037407	-0.64848	0.54046	0.00139928	0	0.51219	0.883219	0	0
AD	AR	7	51951648	52635123	2966	195	-0.0463857	-0.85527	0.73239	0.00215164	0	0.96202	0.880724	0	0
AD	AR	7	54550501	55161394	2292	206	-0.135291	-0.69658	0.38409	0.0183038	0	0.51668	0.566078	0	0
AD	AR	7	73128831	75243899	2047	294	-0.281474	-1	0.31562	0.0792277	0	1	0.327787	0	1
AD	AR	7	75243900	76451928	2875	271	-0.438103	-1	0.3666	0.191934	0	1	0.247541	0	1
AD	AR	7	78685010	80055721	3234	277	-0.39993	-1	0.21992	0.159944	0	1	0.18075	0	1
AD	AR	7	80055722	81533566	3656	341	-0.180725	-0.6446	0.21734	0.0326615	0	0.41585	0.360186	0	0
AD	AR	7	92530166	93691725	2499	283	0.0612685	-0.69067	0.87213	0.00375383	0	1	0.837857	0	0
AD	AR	7	97420208	98173564	1884	209	-0.304682	-1	0.29361	0.092831	0	1	0.286093	0	1
AD	AR	7	98173565	99465540	2723	245	0.221825	-0.13302	0.61049	0.0492063	0	0.37269	0.210364	0	0
AD	AR	7	104109232	105312563	2720	303	-0.62382	-1	0.21476	0.389151	0	1	0.137049	0	1
AD	AR	7	105312564	106399739	2979	349	0.349931	-0.11915	1	0.122452	0	1	0.142423	0	1
AD	AR	7	106399740	107658603	2671	302	-0.0832935	-1	0.7753	0.0069378	0	1	0.807947	0	1
AD	AR	7	110479480	111795299	2458	298	1	0.22113	1	1	0.05775	1	0.0120325	1	1
AD	AR	7	115321302	116835336	3118	318	0.558041	0.0583	1	0.31141	0.00768	1	0.032419	1	1
AD	AR	7	126640873	127903738	2868	278	0.946621	0.37123	1	0.896092	0.13781	1	0.0028024	1	1
AD	AR	7	130418705	131856481	3493	368	-0.225641	-0.64005	0.14898	0.0509138	0	0.40967	0.232325	0	0
AD	AR	7	131856482	133807216	4401	348	-0.464448	-1	0.36374	0.215712	0	1	0.221847	0	1
AD	AR	7	134943222	136113467	3497	316	-0.773284	-1	-0.1146	0.597968	0.02112	1	0.023763	0	1
AD	AR	7	136113468	137657459	3739	335	0.329003	-0.39269	1	0.108243	0	1	0.32407	0	1
AD	AR	7	137657460	138755107	2832	338	0.0947718	-0.41209	0.65281	0.00898169	0	0.47031	0.676663	0	0
AD	AR	7	138755108	140217630	3493	353	-0.081192	-0.78396	0.55631	0.00659213	0	0.8083	0.757524	0	0
AD	AR	7	142098980	144324464	3885	325	-0.582897	-1	0.10632	0.339769	0	1	0.0861059	0	1
AD	AR	7	146574328	147352171	2378	221	-0.0225731	-1	1	0.000509544	0	1	0.954752	0	1
AD	AR	7	148622914	149842999	2948	302	0.420895	-0.14181	1	0.177152	0	1	0.132587	0	1
AD	AR	7	149843000	150897818	2930	304	0.086676	-0.22687	0.41317	0.00751273	0	0.17538	0.580124	0	0
AD	AR	7	150897819	152253294	2914	363	-0.0562942	-0.79475	0.61387	0.00316904	0	0.79118	0.843446	0	0
AD	AR	7	153241229	154407487	2812	334	-0.0490599	-0.8688	0.73866	0.00240688	0	1	0.875539	0	0
AD	AR	7	156344387	157199331	2953	271	-0.327796	-1	0.18914	0.10745	0	1	0.189239	0	1
AD	AR	7	157199332	158031247	2972	340	0.0986331	-0.51507	0.7972	0.0097285	0	0.67486	0.720105	0	0
AD	AR	8	11740	660414	1911	251	0.352669	-0.21691	1	0.124375	0	1	0.204644	0	1
AD	AR	8	1161825	1628039	2027	279	-0.363942	-0.92693	0.04605	0.132453	0	0.85921	0.0867726	0	0
AD	AR	8	1628040	2070902	1781	329	-0.172491	-1	0.60522	0.0297532	0	1	0.602865	0	1
AD	AR	8	2396123	2970491	2612	312	0.788609	0.00618	1	0.621904	0.00991	1	0.0481504	1	1
AD	AR	8	6019164	6663427	3226	337	0.34999	-0.10532	0.96928	0.122493	0	0.9395	0.137323	0	0
AD	AR	8	6663428	8064600	1383	244	-0.07881	-0.76142	0.56549	0.00621102	0	0.70111	0.775	0	0
AD	AR	8	12296850	12947935	1570	183	0.828473	0.21305	1	0.686367	0.04854	1	0.0129232	1	1
AD	AR	8	16988031	17492672	2097	278	-0.060408	-0.87594	0.6785	0.00364913	0	1	0.843809	0	0
AD	AR	8	18668610	19488888	3017	339	0.339707	-0.26434	1	0.115401	0	1	0.247111	0	1
AD	AR	8	19488889	20135628	2291	300	0.508534	-0.21028	1	0.258607	0	1	0.156536	0	1
AD	AR	8	22895019	23788494	3067	316	-0.391648	-1	0.13386	0.153388	0	1	0.134615	0	1
AD	AR	8	25859278	26679135	3029	306	0.468942	-0.07895	1	0.219907	0	1	0.0820028	0	1
AD	AR	8	26679136	27406511	2706	248	-0.236367	-1	0.28808	0.0558693	0	1	0.339203	0	1
AD	AR	8	27406512	28344176	2561	293	-0.0337663	-0.44727	0.36645	0.00114017	0	0.24473	0.853779	0	0
AD	AR	8	28344177	29744540	3193	332	0.607083	0.01025	1	0.36855	0.00577	1	0.0506571	1	1
AD	AR	8	32454963	33982537	3415	308	0.446767	-0.56095	1	0.1996	0	1	0.322047	0	1
AD	AR	8	54119374	55275354	2951	241	-0.711132	-1	-0.06383	0.505709	0.01224	1	0.0325681	0	1
AD	AR	8	58675118	59555977	2583	272	-0.140022	-1	0.67199	0.019606	0	1	0.672403	0	1
AD	AR	8	59555978	60476248	2158	254	1	0.32353	1	1	0.10666	1	0.000379214	1	1
AD	AR	8	70004666	70872088	2082	284	0.0633283	-0.78896	0.98136	0.00401047	0	1	0.84794	0	0
AD	AR	8	72013185	72917489	2449	328	-0.00866566	-0.67583	0.64472	7.51e-05	0	0.66014	0.975284	0	0
AD	AR	8	73838028	75011699	3095	320	-0.220428	-1	0.70789	0.0485884	0	1	0.568508	0	1
AD	AR	8	77377990	78633659	3154	266	0.254567	-0.4705	1	0.0648044	0	1	0.424719	0	1
AD	AR	8	85116735	86251870	2498	210	0.863057	0.32778	1	0.744867	0.10871	1	0.00356846	1	1
AD	AR	8	86251871	87563145	2015	184	0.380059	-0.12152	1	0.144445	0	1	0.128471	0	1
AD	AR	8	94999067	96175630	3432	283	-0.321724	-1	0.31825	0.103506	0	1	0.289251	0	1
AD	AR	8	96175631	96900513	2225	294	-0.273596	-1	0.53506	0.0748546	0	1	0.433887	0	1
AD	AR	8	98132520	99388944	3154	322	0.0523111	-0.37197	0.5009	0.00273645	0	0.28465	0.796675	0	0
AD	AR	8	101448440	102548680	2648	341	0.876398	0.34648	1	0.768074	0.1201	1	0.00164102	1	1
AD	AR	8	105370131	106500950	2815	317	-0.459433	-1	0.32277	0.211078	0	1	0.225051	0	1
AD	AR	8	107787164	108647463	2707	229	-1	-1	-0.3574	1	0.12796	1	0.00232046	0	1
AD	AR	8	116094204	118300068	4137	357	-0.770921	-1	-0.19708	0.59432	0.04143	1	0.0103601	0	1
AD	AR	8	118300069	119423298	2651	312	0.412747	-0.1049	1	0.17036	0	1	0.115157	0	1
AD	AR	8	121554391	122622804	3015	297	-0.489309	-1	0.12834	0.239424	0	1	0.109895	0	1
AD	AR	8	122622805	124001019	2892	319	0.166627	-0.4254	0.83282	0.0277645	0	0.72292	0.530835	0	0
AD	AR	8	125453323	126766827	3496	346	0.195559	-0.28399	0.8329	0.0382433	0	0.71024	0.406965	0	0
AD	AR	8	129291119	130383563	2970	266	1	0.24702	1	1	0.06652	1	0.00552302	1	1
AD	AR	8	133461552	134509448	3076	336	0.697678	0.2233	1	0.486754	0.05028	1	0.00541432	1	1
AD	AR	8	134509449	135313673	2973	316	-0.326515	-0.87025	0.09732	0.106612	0	0.75734	0.123652	0	0
AD	AR	8	141527882	142611889	2969	325	0.206222	-0.27141	0.80286	0.0425274	0	0.6542	0.373826	0	0
AD	AR	8	143611462	144934288	3917	323	0.0137459	-0.55081	0.62788	0.00018895	0	0.54687	0.955406	0	0
AD	AR	8	144934289	146303787	2072	265	0.843271	0.28221	1	0.711105	0.07981	1	0.00518313	1	1
AD	AR	9	653662	1103598	1904	271	-0.591342	-1	-0.07458	0.349685	0.01145	1	0.0264662	0	1
AD	AR	9	2441121	3079045	1928	301	-0.291544	-0.96635	0.21893	0.0849978	0	0.93383	0.243423	0	0
AD	AR	9	4025356	4596614	2048	325	-0.575323	-1	-0.18467	0.330996	0.03437	1	0.00549313	0	1
AD	AR	9	4596615	5437591	2365	283	0.105438	-0.37946	0.63237	0.0111173	0	0.42516	0.646161	0	0
AD	AR	9	14244748	14902924	2051	331	-0.0546656	-0.95047	0.79459	0.00298832	0	1	0.868156	0	0
AD	AR	9	16658378	17392382	2681	204	-0.198448	-1	0.5164	0.0393814	0	1	0.524021	0	1
AD	AR	9	18754197	19463292	2286	261	-0.335429	-1	0.34049	0.112513	0	1	0.293111	0	1
AD	AR	9	21674033	23091193	3650	330	0.880424	0.11272	1	0.775147	0.02007	1	0.0260629	1	1
AD	AR	9	27366480	28067454	2172	273	0.292212	-0.51907	1	0.0853878	0	1	0.417068	0	1
AD	AR	9	28067455	28766060	2290	288	0.365822	-0.54046	1	0.133826	0	1	0.347549	0	1
AD	AR	9	37687113	38822977	2811	312	0.483991	0.044	1	0.234248	0.00482	1	0.0414784	1	1
AD	AR	9	70939678	72288878	2906	295	-0.30666	-1	0.63225	0.0940404	0	1	0.448969	0	1
AD	AR	9	73915495	74950318	2392	299	-0.753262	-1	-0.09786	0.567403	0.01737	1	0.0295523	0	1
AD	AR	9	77862309	78630915	2686	295	0.103433	-0.55336	0.85397	0.0106983	0	0.83689	0.715201	0	0
AD	AR	9	78630916	79451035	2494	335	-0.3097	-0.7452	0.06089	0.0959141	0	0.55532	0.103784	0	0
AD	AR	9	85135752	86769886	4034	349	0.0241089	-1	1	0.000581239	0	1	0.953639	0	1
AD	AR	9	86769887	87815449	3172	295	0.449274	-0.3233	1	0.201847	0	1	0.214819	0	1
AD	AR	9	90135155	90890979	2290	240	-0.70505	-1	-0.15718	0.497095	0.02734	1	0.0148109	0	1
AD	AR	9	91643256	92500277	2351	266	-0.236684	-0.70913	0.1713	0.0560191	0	0.50287	0.244029	0	0
AD	AR	9	92500278	93441050	2611	252	0.589359	0.16448	1	0.347344	0.02793	1	0.00776205	1	1
AD	AR	9	93441051	94175374	2201	268	0.592122	0.0849	1	0.350609	0.01064	1	0.030717	1	1
AD	AR	9	100310518	101596750	3467	333	-0.134954	-1	0.78767	0.0182125	0	1	0.718317	0	1
AD	AR	9	107061020	108203095	3604	313	-0.302756	-0.88524	0.12812	0.0916614	0	0.78889	0.155525	0	0
AD	AR	9	110630151	111368107	2277	252	0.0181483	-1	1	0.000329359	0	1	0.960092	0	1
AD	AR	9	112865521	113646149	2593	298	-0.380873	-1	0.10051	0.145064	0	1	0.117991	0	1
AD	AR	9	114443476	115390112	2640	244	0.521793	0.01864	1	0.272267	0.0045	1	0.042707	1	1
AD	AR	9	116159541	117054909	2521	322	-0.0277331	-0.90367	0.76325	0.000769124	0	1	0.930957	0	0
AD	AR	9	117054910	117989017	2786	291	-0.489332	-1	0.0062	0.239446	0	1	0.0539277	0	1
AD	AR	9	117989018	119001227	2680	246	0.386112	-0.09284	1	0.149082	0	1	0.105316	0	1
AD	AR	9	119001228	119890464	2577	306	-0.298765	-0.97187	0.19791	0.0892604	0	0.94642	0.222179	0	0
AD	AR	9	121008530	122677719	3854	349	-0.0809127	-1	0.78135	0.00654687	0	1	0.813098	0	1
AD	AR	9	124119884	125137578	2532	310	-0.214206	-1	0.66925	0.0458843	0	1	0.558468	0	1
AD	AR	9	126092932	127184582	2846	306	0.18164	-0.36827	0.84495	0.0329929	0	0.73857	0.478088	0	0
AD	AR	9	129617772	130902727	2538	273	0.0918703	-0.66677	0.94208	0.00844015	0	1	0.766753	0	0
AD	AR	9	132193799	132999452	2707	277	0.560468	0.11627	1	0.314124	0.01417	1	0.0182825	1	1
AD	AR	9	134141937	135135887	2335	304	0.127482	-0.36598	0.6626	0.0162517	0	0.45242	0.579813	0	0
AD	AR	9	136042491	136770926	2777	310	-0.230562	-1	0.43194	0.0531588	0	1	0.441726	0	1
AD	AR	9	136770927	137593527	2407	300	0.248513	-0.13745	0.69152	0.0617586	0	0.4782	0.201735	0	0
AD	AR	9	137593528	138202112	2433	348	0.0903738	-0.44651	0.69128	0.00816743	0	0.50754	0.708273	0	0
AD	AR	9	138202113	138995791	2491	334	0.246529	-0.35538	1	0.0607766	0	1	0.37837	0	1
AD	AR	9	140097760	141146682	1878	312	0.203715	-0.16647	0.59867	0.0414999	0	0.35841	0.259235	0	0
AD	AR	10	2637066	3225336	2286	285	0.0251784	-0.39108	0.43398	0.000633951	0	0.23104	0.897011	0	0
AD	AR	10	3880323	4813182	2897	333	-0.0665789	-0.66685	0.50438	0.00443274	0	0.53684	0.791207	0	0
AD	AR	10	5396243	6234718	3120	341	0.0616378	-0.2629	0.39308	0.00379922	0	0.16318	0.698282	0	0
AD	AR	10	6234719	6897037	2066	309	-0.370354	-1	0.09308	0.137162	0	1	0.119458	0	1
AD	AR	10	6897038	7659872	2681	334	0.268862	-0.37458	1	0.0722866	0	1	0.360105	0	1
AD	AR	10	7659873	8771920	3830	351	0.498751	0.03378	1	0.248752	0.00429	1	0.0388685	1	1
AD	AR	10	11856925	12581571	2252	294	-0.0383014	-0.68833	0.58635	0.001467	0	0.63758	0.88283	0	0
AD	AR	10	20616433	21477692	2535	258	-0.988798	-1	-0.30023	0.977722	0.09239	1	0.00773739	0	1
AD	AR	10	23365686	24489447	2659	263	0.0657239	-0.51222	0.69144	0.00431963	0	0.56313	0.803476	0	0
AD	AR	10	29393750	30000223	2157	275	-0.0842599	-0.60683	0.4125	0.00709973	0	0.40165	0.713517	0	0
AD	AR	10	30000224	30919469	2782	294	0.432	-0.25011	1	0.186624	0	1	0.179583	0	1
AD	AR	10	30919470	32457293	3584	300	0.0421681	-0.50482	0.60374	0.00177815	0	0.45393	0.85908	0	0
AD	AR	10	46327145	49197320	1332	222	-0.0747194	-0.48787	0.32279	0.00558299	0	0.25338	0.684232	0	0
AD	AR	10	49197321	50145673	2149	255	-0.0130122	-0.68907	0.66753	0.000169318	0	0.71662	0.962935	0	0
AD	AR	10	53919162	55104428	3289	302	-0.964799	-1	-0.48414	0.930837	0.23439	1	0.00025491	0	1
AD	AR	10	71050505	71672997	2309	334	0.859848	0.27332	1	0.739339	0.07684	1	0.00527052	1	1
AD	AR	10	71672998	72659223	3361	334	0.4599	-0.17478	1	0.211508	0	1	0.147858	0	1
AD	AR	10	72659224	73514214	3073	359	-0.200647	-0.99073	0.41949	0.0402591	0	1	0.48004	0	0
AD	AR	10	75694024	77144961	2681	233	0.0637511	-0.7495	0.95011	0.00406421	0	1	0.845071	0	0
AD	AR	10	81190574	81763230	1391	85	0.440037	-0.28381	1	0.193632	0	1	0.209773	0	1
AD	AR	10	82378049	83596350	3784	284	-0.691411	-1	0.02275	0.478049	0	1	0.0626005	0	1
AD	AR	10	83596351	84679429	2831	285	0.15464	-0.42923	0.83689	0.0239134	0	0.72223	0.562836	0	0
AD	AR	10	85463485	86459980	3168	293	0.00886691	-1	1	7.86e-05	0	1	0.982603	0	1
AD	AR	10	98005995	99367800	3473	343	-0.0547178	-0.97281	0.78102	0.00299403	0	1	0.868877	0	0
AD	AR	10	99367801	100337830	2382	301	0.0255717	-0.38191	0.45604	0.000653913	0	0.24655	0.896644	0	0
AD	AR	10	102509299	104206837	3055	324	-0.367218	-1	0.22242	0.134849	0	1	0.20659	0	1
AD	AR	10	107877788	108725997	2612	236	-0.0951582	-0.86136	0.58089	0.00905508	0	0.89207	0.746291	0	0
AD	AR	10	109579150	110358382	2698	229	0.00279893	-1	1	7.83e-06	0	1	0.994152	0	1
AD	AR	10	118416050	119528730	2492	319	0.207729	-0.27849	0.79258	0.0431514	0	0.63195	0.380564	0	0
AD	AR	10	123856185	124894142	3132	330	-0.574442	-1	0.1555	0.329984	0	1	0.113757	0	1
AD	AR	10	127997709	129134738	2842	342	-0.191686	-0.76575	0.30138	0.0367434	0	0.59719	0.410821	0	0
AD	AR	10	132576794	133111170	2560	330	0.296622	-0.32695	1	0.0879847	0	1	0.315008	0	1
AD	AR	10	134856055	135524372	1891	221	0.157032	-0.47511	0.9201	0.0246592	0	0.90965	0.576024	0	0
AD	AR	11	1061400	1857845	2761	279	-0.137982	-0.70705	0.33481	0.0190389	0	0.5081	0.547707	0	0
AD	AR	11	1857846	2477449	1979	271	-0.563377	-1	-0.18414	0.317394	0.03411	1	0.00550591	0	1
AD	AR	11	2477450	3362508	2285	346	-0.58667	-1	0.00683	0.344182	0	1	0.0504508	0	1
AD	AR	11	5533058	6180840	2598	260	-0.103207	-0.99731	0.67841	0.0106517	0	1	0.750713	0	0
AD	AR	11	6180841	7191230	2781	330	-0.724045	-1	-0.14549	0.524241	0.02432	1	0.0172136	0	1
AD	AR	11	11081300	11632650	2199	319	-0.24051	-1	0.42637	0.0578453	0	1	0.429118	0	1
AD	AR	11	11632651	12470449	2742	335	-0.250114	-0.86418	0.24773	0.0625571	0	0.74992	0.291429	0	0
AD	AR	11	17583949	18740267	2828	305	0.712506	0.12072	1	0.507665	0.01894	1	0.0190899	1	1
AD	AR	11	18740268	19780784	2615	307	-0.362781	-1	0.65422	0.13161	0	1	0.411598	0	1
AD	AR	11	20686337	21442722	2183	308	-0.384083	-1	0.62628	0.14752	0	1	0.391583	0	1
AD	AR	11	23164545	24091272	3333	238	0.391384	-0.49619	1	0.153181	0	1	0.323664	0	1
AD	AR	11	24892440	25662918	2896	173	-0.406625	-1	0.26083	0.165344	0	1	0.202771	0	1
AD	AR	11	35500368	36331189	2118	292	0.519177	-0.04659	1	0.269545	0	1	0.0740947	0	1
AD	AR	11	46316006	48066366	2934	218	0.074342	-0.63076	0.84523	0.00552673	0	0.93589	0.792651	0	0
AD	AR	11	57675987	58452708	2238	163	0.30212	-0.45625	1	0.0912766	0	1	0.368253	0	1
AD	AR	11	59256233	60515105	3116	279	0.214411	-0.16773	0.68295	0.0459721	0	0.46693	0.26099	0	0
AD	AR	11	60515106	61717117	2385	303	-0.68376	-1	-0.07908	0.467527	0.01181	1	0.0296158	0	1
AD	AR	11	61717118	62800368	2413	301	0.345607	-0.31273	1	0.119444	0	1	0.273126	0	1
AD	AR	11	62800369	64594822	3478	319	-0.0868605	-0.59252	0.39416	0.00754474	0	0.3795	0.701966	0	0
AD	AR	11	68000950	68887344	2141	232	0.291304	-0.32193	1	0.084858	0	1	0.315695	0	1
AD	AR	11	68887345	69713996	2299	296	0.0787025	-0.31709	0.49796	0.00619409	0	0.25888	0.685868	0	0
AD	AR	11	76518907	77719870	2709	255	0.691449	0.19421	1	0.478102	0.03839	1	0.00873089	1	1
AD	AR	11	78912253	79802286	2575	324	0.00111502	-0.6184	0.5997	1.24e-06	0	0.55499	0.996544	0	0
AD	AR	11	82833182	83677773	2310	236	0.0704711	-0.50947	0.7164	0.00496618	0	0.60026	0.775248	0	0
AD	AR	11	83677774	84613229	2383	264	0.342238	-0.1583	1	0.117127	0	1	0.173188	0	1
AD	AR	11	85869060	86629333	2396	264	-0.131155	-0.45168	0.1691	0.0172016	0	0.20421	0.388169	0	0
AD	AR	11	95327211	96150134	2350	294	-0.0641462	-0.74105	0.56436	0.00411474	0	0.67446	0.812007	0	0
AD	AR	11	98145571	98929380	2785	228	-0.605181	-1	0.07267	0.366245	0	1	0.0780313	0	1
AD	AR	11	101881253	102671665	2281	305	0.0777301	-0.59467	0.84338	0.00604196	0	0.86971	0.78485	0	0
AD	AR	11	105932283	107054024	2825	282	-0.0220479	-0.6175	0.57868	0.000486108	0	0.61853	0.928592	0	0
AD	AR	11	107846825	109891837	3834	311	0.371674	-0.43734	1	0.138142	0	1	0.3147	0	1
AD	AR	11	109891838	111117780	3140	290	0.651664	-0.05337	1	0.424666	0	1	0.0789769	0	1
AD	AR	11	120064529	121208186	2781	329	0.0636098	-0.39101	0.5255	0.00404621	0	0.31982	0.765678	0	0
AD	AR	11	121208187	122589224	2949	326	0.281406	-0.1502	0.82946	0.0791896	0	0.68899	0.210605	0	0
AD	AR	11	126304241	127306871	3078	335	0.252236	-0.67894	1	0.0636229	0	1	0.512768	0	1
AD	AR	11	127306872	128262550	2671	297	0.0642134	-1	1	0.00412337	0	1	0.87215	0	1
AD	AR	11	128262551	129451784	3028	355	-0.213927	-1	0.5257	0.0457647	0	1	0.503986	0	1
AD	AR	11	129451785	130500783	3027	319	-0.544956	-1	0.01919	0.296977	0	1	0.0613425	0	1
AD	AR	11	133521643	134351064	2270	339	0.429225	-0.0291	1	0.184234	0	1	0.0682785	0	1
AD	AR	12	1078398	1942426	2563	297	-0.123109	-0.86435	0.51834	0.0151558	0	0.86045	0.659404	0	0
AD	AR	12	1942427	3069506	2714	338	0.442211	-0.54963	1	0.19555	0	1	0.322993	0	1
AD	AR	12	3069507	3871114	2531	331	-0.51175	-1	0.1687	0.261888	0	1	0.119367	0	1
AD	AR	12	6023701	6948954	2245	312	0.269892	-0.20522	0.85931	0.0728417	0	0.73993	0.247519	0	0
AD	AR	12	6948955	8123317	2773	306	0.524139	0.10198	1	0.274721	0.01237	1	0.0168898	1	1
AD	AR	12	8123318	8760628	1107	153	0.245505	-0.46404	1	0.0602727	0	1	0.440036	0	1
AD	AR	12	11742150	12721874	2415	308	-0.273816	-0.7073	0.08235	0.0749752	0	0.50028	0.130837	0	0
AD	AR	12	12721875	13559527	1975	304	-0.0962005	-0.62741	0.39981	0.00925453	0	0.43332	0.676593	0	0
AD	AR	12	13559528	14656849	3381	316	0.493665	-0.16276	1	0.243705	0	1	0.136076	0	1
AD	AR	12	20074931	20866285	2348	289	0.120227	-0.35742	0.6574	0.0144545	0	0.45164	0.59389	0	0
AD	AR	12	22928056	23923798	2345	326	0.489268	-0.2614	1	0.239383	0	1	0.177641	0	1
AD	AR	12	25058715	25990813	3145	292	0.569025	0.15519	1	0.32379	0.02523	1	0.00796879	1	1
AD	AR	12	25990814	26958056	3052	286	-0.160797	-1	0.4846	0.0258557	0	1	0.584203	0	1
AD	AR	12	26958057	27797262	2376	214	0.107576	-0.70938	1	0.0115727	0	1	0.747395	0	1
AD	AR	12	29647194	30358377	2692	285	0.566469	-0.25534	1	0.320887	0	1	0.15206	0	1
AD	AR	12	46037745	47499603	3157	291	-0.272707	-1	0.56451	0.0743689	0	1	0.441157	0	1
AD	AR	12	48960266	50344346	2557	265	0.313366	-0.32228	1	0.0981983	0	1	0.290476	0	1
AD	AR	12	51769420	53039987	3627	340	-1	-1	-0.18396	1	0.04344	1	0.0121907	0	1
AD	AR	12	53039988	54371448	3314	303	0.896912	0.24935	1	0.804451	0.06523	1	0.0105575	1	1
AD	AR	12	54371449	55416802	2453	304	0.0405233	-0.55353	0.66565	0.00164213	0	0.54548	0.875419	0	0
AD	AR	12	56987106	58748139	3114	291	-0.190897	-0.83074	0.34866	0.0364417	0	0.70243	0.449056	0	0
AD	AR	12	66114644	67183620	2473	297	-0.264473	-0.719	0.12281	0.069946	0	0.51696	0.177059	0	0
AD	AR	12	68006683	68839661	2153	268	-0.114358	-0.6467	0.38897	0.0130777	0	0.44788	0.620812	0	0
AD	AR	12	73154516	74080747	2606	192	0.286268	-0.35093	1	0.0819491	0	1	0.351512	0	1
AD	AR	12	75563969	76524573	2241	276	-0.335001	-1	0.38655	0.112225	0	1	0.313955	0	1
AD	AR	12	77800464	79315178	3984	354	-0.200683	-0.9003	0.36536	0.0402737	0	0.8511	0.445204	0	0
AD	AR	12	95147846	96017782	2960	249	-0.0505023	-0.76908	0.62214	0.00255048	0	0.74222	0.859004	0	0
AD	AR	12	97814022	99244337	3476	338	-0.167061	-1	0.54951	0.0279093	0	1	0.584174	0	1
AD	AR	12	101825062	102966633	3105	286	0.21671	-0.22051	0.80475	0.0469633	0	0.65691	0.302803	0	0
AD	AR	12	111592382	113947983	4194	306	0.109451	-0.50222	0.81863	0.0119795	0	0.74102	0.683591	0	0
AD	AR	12	114685671	115439451	2300	284	-0.405115	-1	0.06426	0.164119	0	1	0.0904055	0	1
AD	AR	12	116197676	117091843	2441	314	0.420892	-0.27589	1	0.17715	0	1	0.204995	0	1
AD	AR	12	121817510	123396634	3209	263	0.180765	-0.22068	0.62429	0.0326759	0	0.3933	0.362578	0	0
AD	AR	12	127545378	128372588	2488	316	0.279827	-0.15178	0.79285	0.0783032	0	0.62867	0.194282	0	0
AD	AR	12	128372589	129170296	2434	328	0.182719	-0.62877	1	0.0333861	0	1	0.588279	0	1
AD	AR	12	130629841	131404042	2677	328	-0.396665	-1	0.33435	0.157343	0	1	0.258435	0	1
AD	AR	13	20491182	21540733	3019	296	-0.117538	-0.78004	0.46325	0.0138152	0	0.65257	0.654731	0	0
AD	AR	13	22795189	23729049	3506	354	-0.304755	-1	0.23094	0.0928757	0	1	0.247068	0	1
AD	AR	13	26681710	27392005	2287	232	-0.186974	-1	0.53997	0.0349594	0	1	0.55164	0	1
AD	AR	13	37499811	38290689	2449	210	0.292739	-0.50504	1	0.0856961	0	1	0.412906	0	1
AD	AR	13	42950158	43931931	2490	299	-0.211966	-1	0.4539	0.0449296	0	1	0.471768	0	1
AD	AR	13	46493237	47433528	2067	233	-0.351538	-1	0.38364	0.123579	0	1	0.311984	0	1
AD	AR	13	51554237	53336571	3871	317	0.401002	-0.12893	1	0.160803	0	1	0.140667	0	1
AD	AR	13	54684857	55576912	2439	212	0.225584	-0.38056	1	0.0508881	0	1	0.425082	0	1
AD	AR	13	61268156	62135827	2948	226	-0.199811	-1	0.7183	0.0399244	0	1	0.591088	0	1
AD	AR	13	74437636	75882384	3945	337	-0.509637	-1	0.05012	0.259729	0	1	0.068329	0	1
AD	AR	13	79489046	80778339	2900	292	0.32528	-0.35588	1	0.105807	0	1	0.292576	0	1
AD	AR	13	94925137	96132647	3978	349	-0.116154	-0.80273	0.4813	0.0134917	0	0.69595	0.663473	0	0
AD	AR	13	98527336	99402294	2452	316	-0.0376031	-0.4815	0.39772	0.001414	0	0.27597	0.853445	0	0
AD	AR	13	101573737	103050417	4231	368	-0.120014	-0.97186	0.57764	0.0144033	0	1	0.696664	0	0
AD	AR	13	103050418	104378435	4166	337	-0.340347	-1	0.23986	0.115836	0	1	0.22949	0	1
AD	AR	13	106313848	107037864	2165	287	0.175903	-0.32222	0.76195	0.0309417	0	0.58747	0.452816	0	0
AD	AR	13	107037865	108521978	3988	388	0.109485	-0.82018	1	0.0119869	0	1	0.764124	0	1
AD	AR	13	108521979	109156765	2109	255	-0.406602	-1	0.12669	0.165325	0	1	0.134869	0	1
AD	AR	13	110995433	111621244	2241	316	0.461837	-0.03516	1	0.213294	0	1	0.0691204	0	1
AD	AR	13	111621245	112319064	2563	306	1	0.47794	1	1	0.22842	1	3.15e-05	1	1
AD	AR	13	114302562	115109851	1756	196	-0.297127	-1	0.23373	0.0882847	0	1	0.254113	0	1
AD	AR	14	20876081	21982654	2932	380	0.0828083	-0.47003	0.69515	0.00685722	0	0.55125	0.741923	0	0
AD	AR	14	22760701	23985936	3134	373	0.341415	-0.11549	0.99098	0.116564	0	0.98204	0.143629	0	0
AD	AR	14	23985937	24906056	2017	287	0.249645	-0.37215	1	0.0623224	0	1	0.390956	0	1
AD	AR	14	24906057	25585041	2168	209	-0.290941	-1	0.55014	0.0846469	0	1	0.428262	0	1
AD	AR	14	26395691	27720240	2876	293	-0.338506	-1	0.28673	0.114586	0	1	0.249094	0	1
AD	AR	14	30831155	32382245	3399	261	0.227843	-0.4098	1	0.0519126	0	1	0.436582	0	1
AD	AR	14	32382246	33591113	2992	351	-0.0719634	-0.85415	0.62802	0.00517873	0	0.90198	0.810183	0	0
AD	AR	14	33591114	34695195	3117	390	-0.450896	-1	0.1973	0.203308	0	1	0.152511	0	1
AD	AR	14	34695196	35379988	1904	199	-0.123251	-0.82815	0.50079	0.0151909	0	0.76008	0.64914	0	0
AD	AR	14	35379989	36422077	2367	212	-0.079571	-0.75559	0.56209	0.00633155	0	0.67103	0.771214	0	0
AD	AR	14	46748239	48177483	3585	251	0.797634	0.10174	1	0.63622	0.01656	1	0.0283296	1	1
AD	AR	14	51418372	52206122	2455	273	-0.347806	-1	0.30843	0.120969	0	1	0.254744	0	1
AD	AR	14	52206123	52760553	2053	236	0.377555	-0.49894	1	0.142548	0	1	0.326246	0	1
AD	AR	14	52760554	54359598	3831	318	0.677476	0.23296	1	0.458974	0.05437	1	0.00410124	1	1
AD	AR	14	54359599	55292832	2010	266	-0.10715	-0.53909	0.30737	0.011481	0	0.29923	0.59085	0	0
AD	AR	14	58447799	59447537	2265	292	0.997258	0.21478	1	0.994524	0.04968	1	0.01583	1	1
AD	AR	14	60099483	61652816	2808	242	0.318123	-0.3207	1	0.101202	0	1	0.275208	0	1
AD	AR	14	61652817	62717985	2920	304	0.0888062	-0.51187	0.76282	0.00788653	0	0.71581	0.737777	0	0
AD	AR	14	62717986	64033237	3943	302	0.0549342	-0.80665	0.98726	0.00301776	0	1	0.869336	0	0
AD	AR	14	68976913	69794542	2247	284	-0.381591	-1	0.19339	0.145612	0	1	0.184339	0	1
AD	AR	14	72665320	73373373	2150	266	-0.210384	-1	0.62619	0.0442615	0	1	0.557349	0	1
AD	AR	14	73373374	74245428	2279	185	-0.964385	-1	-0.20706	0.930038	0.05189	1	0.0194724	0	1
AD	AR	14	76694202	77425453	2011	297	-0.057119	-0.53967	0.40845	0.00326258	0	0.33593	0.79088	0	0
AD	AR	14	78374054	79199451	2492	276	0.598455	-0.03883	1	0.358149	0	1	0.0671547	0	1
AD	AR	14	85562937	86653343	2996	267	-0.0575802	-0.87665	0.70683	0.00331548	0	1	0.853723	0	0
AD	AR	14	86653344	87350275	2168	221	0.184842	-0.52567	1	0.0341666	0	1	0.552436	0	1
AD	AR	14	88208596	89482883	3613	280	0.44114	-0.15624	1	0.194604	0	1	0.144524	0	1
AD	AR	14	90662837	92101228	3942	336	0.362585	-0.05149	0.98524	0.131468	0	0.97457	0.0912932	0	0
AD	AR	14	92101229	93386328	3814	343	-0.373322	-1	0.03124	0.139369	0	1	0.0659503	0	1
AD	AR	14	98885323	99474533	2323	260	-0.16668	-0.67505	0.28723	0.0277822	0	0.4591	0.441894	0	0
AD	AR	14	100786190	102004377	3047	372	-0.131312	-0.98596	0.56352	0.0172427	0	1	0.663098	0	0
AD	AR	14	105091341	106347143	1972	239	-0.405708	-1	0.06405	0.164599	0	1	0.0789141	0	1
AD	AR	15	22799927	24099946	1858	285	0.271468	-0.18173	0.81168	0.073695	0	0.65882	0.214891	0	0
AD	AR	15	26392948	27563172	2887	345	0.131732	-0.35133	0.67155	0.0173534	0	0.47494	0.561054	0	0
AD	AR	15	27563173	29141035	2296	251	-0.23504	-0.6827	0.17591	0.0552436	0	0.46608	0.238181	0	0
AD	AR	15	30604120	32177320	2958	320	0.596506	-0.28333	1	0.355819	0	1	0.157458	0	1
AD	AR	15	32177321	33484267	2644	322	0.251488	-0.21737	0.79772	0.0632463	0	0.64035	0.262367	0	0
AD	AR	15	33484268	34410072	3062	330	-0.432182	-1	0.08351	0.186781	0	1	0.110214	0	1
AD	AR	15	35118928	36583327	3560	328	-0.374933	-1	0.37015	0.140575	0	1	0.283168	0	1
AD	AR	15	37962916	39238840	3337	345	0.0331755	-0.6124	0.7162	0.00110062	0	0.73127	0.905004	0	0
AD	AR	15	39238841	40604780	3364	315	0.0978209	-0.33657	0.57223	0.00956892	0	0.34725	0.636474	0	0
AD	AR	15	46022643	46884071	2038	200	-0.693424	-1	-0.04444	0.480836	0.01063	1	0.0402976	0	1
AD	AR	15	51605478	53263126	4395	302	0.839985	0.12087	1	0.705575	0.02202	1	0.0255242	1	1
AD	AR	15	53263127	54332799	3596	291	-0.051294	-0.9681	0.80866	0.00263108	0	1	0.877023	0	0
AD	AR	15	54332800	55136717	2931	251	0.822742	0.26214	1	0.676905	0.06931	1	0.00680314	1	1
AD	AR	15	57641165	58712954	3510	357	-0.123348	-0.71525	0.42019	0.0152147	0	0.5415	0.614342	0	0
AD	AR	15	61130596	62106138	2877	356	-0.00800551	-0.73764	0.68491	6.41e-05	0	0.76621	0.977215	0	0
AD	AR	15	62106139	63218978	3025	346	0.0941538	-0.3223	0.54045	0.00886493	0	0.3004	0.637495	0	0
AD	AR	15	63218979	64339945	3159	283	-0.385654	-1	0.26299	0.148729	0	1	0.218878	0	1
AD	AR	15	70767984	72058129	2869	329	0.170538	-0.53827	1	0.0290832	0	1	0.582373	0	1
AD	AR	15	74458114	76401952	3683	322	0.46439	-0.13624	1	0.215658	0	1	0.120246	0	1
AD	AR	15	79998207	81077025	3465	336	-0.387423	-1	0.20602	0.150096	0	1	0.179257	0	1
AD	AR	15	81077026	82191077	2296	298	0.210192	-0.15069	0.61615	0.0441809	0	0.37964	0.245162	0	0
AD	AR	15	82191078	84209760	3298	303	0.709987	0.15676	1	0.504081	0.02698	1	0.0179917	1	1
AD	AR	15	87158588	88035757	2844	293	-0.385638	-1	0.63809	0.148716	0	1	0.385861	0	1
AD	AR	15	89385188	90632718	2915	342	0.246339	-0.22886	0.8433	0.0606827	0	0.71841	0.286231	0	0
AD	AR	15	90632719	91593623	2591	260	0.149865	-0.30072	0.62642	0.0224594	0	0.39744	0.47935	0	0
AD	AR	15	96864279	98025684	2803	346	-0.570967	-1	-0.1679	0.326003	0.02871	1	0.00622948	0	1
AD	AR	16	6446082	7051429	3114	331	-0.460083	-1	0.09541	0.211677	0	1	0.110523	0	1
AD	AR	16	8341013	9104469	3095	334	1	0.36621	1	1	0.1342	1	0.00121453	1	1
AD	AR	16	10351809	11022542	2124	290	0.31757	-0.1169	0.87288	0.100851	0	0.76211	0.153475	0	0
AD	AR	16	13893408	15921108	3046	321	0.358827	-0.10388	0.98713	0.128757	0	0.97442	0.129004	0	0
AD	AR	16	15921109	17343277	2703	297	0.513185	-0.10084	1	0.263359	0	1	0.0890693	0	1
AD	AR	16	17343278	19104257	3063	296	0.85176	0.17988	1	0.725494	0.03762	1	0.0179242	1	1
AD	AR	16	19104258	20351261	3525	327	0.647277	0.0422	1	0.418967	0.0082	1	0.0408575	1	1
AD	AR	16	20351262	22667048	3104	315	0.695131	0.13442	1	0.483207	0.02054	1	0.018751	1	1
AD	AR	16	22667049	24014705	3469	325	-0.153192	-0.89675	0.42366	0.0234677	0	0.86142	0.560696	0	0
AD	AR	16	26154123	27443061	4180	386	-0.18073	-0.92556	0.40752	0.0326633	0	0.88117	0.508282	0	0
AD	AR	16	29043178	31384210	2419	273	-0.340472	-1	0.35248	0.115921	0	1	0.297228	0	1
AD	AR	16	54866096	55907389	3250	313	0.29844	-0.18059	0.92223	0.0890663	0	0.85051	0.206325	0	0
AD	AR	16	58508979	59885499	3854	313	0.276297	-0.44927	1	0.0763401	0	1	0.400114	0	1
AD	AR	16	66738844	68435728	2788	241	0.550481	-0.14262	1	0.30303	0	1	0.104633	0	1
AD	AR	16	73140782	74135275	2613	365	-0.613613	-1	-0.06164	0.376521	0.00964	1	0.0305072	0	1
AD	AR	16	77739133	78280636	2586	295	-0.740096	-1	-0.01011	0.547742	0.0093	1	0.0503841	0	1
AD	AR	16	78973581	79662634	2729	375	-0.479499	-0.9105	-0.1417	0.229919	0.02027	0.82902	0.00621275	0	0
AD	AR	16	82310205	83077869	3545	359	-0.570742	-1	0.09865	0.325747	0	1	0.0970753	0	1
AD	AR	16	84440155	85146805	3184	362	0.468748	-0.39869	1	0.219725	0	1	0.249796	0	1
AD	AR	16	85146806	86058597	2621	393	-0.629914	-1	0.07907	0.396791	0	1	0.0807134	0	1
AD	AR	16	86058598	86748867	2957	376	0.580991	0.1679	1	0.337551	0.02819	1	0.00637268	1	1
AD	AR	16	88387229	89106304	2498	336	0.824029	0.31246	1	0.679024	0.09783	1	0.00254078	1	1
AD	AR	17	815654	1480056	2260	339	0.155621	-0.30573	0.67666	0.0242179	0	0.47361	0.476142	0	0
AD	AR	17	2699136	3430440	2013	277	0.208817	-0.32875	0.86129	0.0436047	0	0.75459	0.410852	0	0
AD	AR	17	6305079	7264458	2572	334	-0.408575	-0.8049	-0.06767	0.166933	0.0059	0.64786	0.0187063	0	0
AD	AR	17	9619357	10572617	2748	335	0.0599798	-0.23393	0.35915	0.00359758	0	0.13516	0.682069	0	0
AD	AR	17	10572618	11778164	3054	344	-0.261102	-1	0.33491	0.0681745	0	1	0.349185	0	1
AD	AR	17	11778165	12676353	2133	279	-0.647408	-1	-0.09558	0.419138	0.01321	1	0.0222502	0	1
AD	AR	17	13648447	14508610	2713	309	0.0941608	-0.39368	0.61666	0.00886626	0	0.41903	0.682288	0	0
AD	AR	17	17326541	18900978	2647	241	0.0149087	-0.77671	0.85559	0.00022227	0	1	0.961964	0	0
AD	AR	17	18900979	20402494	2052	217	0.167846	-0.41271	0.83397	0.0281721	0	0.7342	0.522784	0	0
AD	AR	17	20402495	21432873	1478	238	0.264033	-0.19947	0.86685	0.0697133	0	0.75603	0.244784	0	0
AD	AR	17	34474612	36116884	2551	324	-0.0998055	-0.73129	0.46215	0.00996114	0	0.58402	0.693946	0	0
AD	AR	17	36116885	37361178	2294	318	0.280763	-0.12763	0.75317	0.0788279	0	0.56726	0.172566	0	0
AD	AR	17	40233546	42348003	3732	326	-0.179995	-0.99789	0.44807	0.0323984	0	1	0.518621	0	0
AD	AR	17	42348004	43460500	2465	263	0.362166	-0.0797	0.93294	0.131164	0	0.87098	0.103163	0	0
AD	AR	17	43460501	44865832	2629	142	0.102195	-0.69211	0.97372	0.0104438	0	1	0.752416	0	0
AD	AR	17	47516225	48722590	2714	382	0.0455735	-0.46712	0.58098	0.00207695	0	0.38872	0.84229	0	0
AD	AR	17	56245228	58652809	3638	279	-0.27473	-1	0.48967	0.0754765	0	1	0.408774	0	1
AD	AR	17	66757557	68176219	2935	299	-0.186058	-1	0.48171	0.0346178	0	1	0.527683	0	1
AD	AR	17	69245591	70495119	3076	351	0.0561639	-0.56883	0.71996	0.00315438	0	0.65632	0.832814	0	0
AD	AR	17	70495120	71466953	2767	372	0.11905	-0.35449	0.63641	0.0141728	0	0.41863	0.593993	0	0
AD	AR	17	73741322	74908266	3059	310	0.0256392	-0.86849	0.93915	0.000657369	0	1	0.938823	0	0
AD	AR	17	74908267	75619256	2397	333	0.142555	-0.55467	0.99774	0.020322	0	1	0.630549	0	0
AD	AR	17	76596288	77412786	2659	356	1	0.47534	1	1	0.22594	1	0.000375537	1	1
AD	AR	17	77412787	78438332	2856	346	-0.148346	-1	0.6003	0.0220066	0	1	0.633312	0	1
AD	AR	17	80459150	81192460	2067	227	0.268185	-0.42134	1	0.0719232	0	1	0.392688	0	1
AD	AR	18	10719	848350	2361	292	0.539025	-0.02928	1	0.290548	0	1	0.0605274	0	1
AD	AR	18	1940212	2839842	2903	307	-0.0162139	-0.9655	0.86613	0.000262892	0	1	0.962378	0	0
AD	AR	18	2839843	3722828	2482	335	-0.245822	-0.62391	0.08524	0.0604286	0	0.38926	0.147917	0	0
AD	AR	18	3722829	4603961	2410	327	-0.23941	-0.81846	0.17453	0.057317	0	0.6717	0.244247	0	0
AD	AR	18	4603962	5575812	2781	308	-0.167527	-0.81913	0.38329	0.0280652	0	0.70009	0.503362	0	0
AD	AR	18	7862480	8788524	2871	321	0.0165654	-0.45365	0.48014	0.000274412	0	0.29498	0.938681	0	0
AD	AR	18	8788525	9816164	3469	342	-0.27152	-0.67972	0.07604	0.0737232	0	0.46202	0.126163	0	0
AD	AR	18	9816165	10675548	2650	354	-0.00932751	-0.3854	0.36493	8.7e-05	0	0.19047	0.958513	0	0
AD	AR	18	10675549	11872226	3512	342	0.0694666	-0.69265	0.90016	0.00482561	0	1	0.824491	0	0
AD	AR	18	11872227	12735558	2626	261	0.379156	-0.13342	1	0.143759	0	1	0.130613	0	1
AD	AR	18	12735559	13641479	2489	309	0.197288	-0.32255	0.80313	0.0389224	0	0.66002	0.418269	0	0
AD	AR	18	22746154	24088163	3402	325	-0.274513	-0.66662	0.06085	0.0753576	0	0.44439	0.113114	0	0
AD	AR	18	24088164	25305260	3211	328	-0.29449	-1	0.28379	0.0867243	0	1	0.281486	0	1
AD	AR	18	25305261	26861067	3446	283	-0.451777	-1	0.13655	0.204102	0	1	0.12027	0	1
AD	AR	18	30401129	32458907	4341	328	0.155019	-0.70932	1	0.0240308	0	1	0.651837	0	1
AD	AR	18	32458908	34153297	3804	345	-0.398702	-1	0.37181	0.158963	0	1	0.268637	0	1
AD	AR	18	46558307	47455925	2539	234	-0.191555	-0.96949	0.44231	0.0366932	0	0.99285	0.498894	0	0
AD	AR	18	47455926	48228379	2328	272	-0.362151	-1	0.21782	0.131154	0	1	0.194449	0	1
AD	AR	18	53762997	54957867	2956	281	0.585259	0.13776	1	0.342528	0.01952	1	0.0116531	1	1
AD	AR	18	58527237	59449422	2358	274	0.478797	-0.23923	1	0.229246	0	1	0.17438	0	1
AD	AR	18	60780195	62074993	3495	312	-0.309834	-0.83818	0.11351	0.0959972	0	0.70254	0.150672	0	0
AD	AR	18	64253144	65294195	3081	227	-0.242862	-1	0.8219	0.0589819	0	1	0.558397	0	1
AD	AR	18	65294196	66407960	3710	286	0.352766	-0.26879	1	0.124444	0	1	0.247645	0	1
AD	AR	18	70540350	71491860	3168	303	0.273763	-0.55803	1	0.0749465	0	1	0.447811	0	1
AD	AR	18	74471746	75240760	2985	326	-0.00872046	-0.59887	0.60269	7.6e-05	0	0.50771	0.972771	0	0
AD	AR	18	77148138	78017072	2733	293	-0.0145467	-0.48363	0.45034	0.000211607	0	0.30982	0.945633	0	0
AD	AR	19	64705	762046	1767	317	-0.292632	-0.82473	0.15087	0.0856333	0	0.68143	0.18386	0	0
AD	AR	19	762047	1515920	1981	330	0.103839	-0.19632	0.40949	0.0107825	0	0.16913	0.483775	0	0
AD	AR	19	1515921	2253174	1751	304	-0.150077	-0.60942	0.27146	0.0225231	0	0.38022	0.455373	0	0
AD	AR	19	2253175	3085446	2490	328	0.208999	-0.25279	0.75884	0.0436806	0	0.58211	0.337276	0	0
AD	AR	19	3085447	3893909	2254	324	-0.256581	-0.78038	0.16033	0.065834	0	0.61008	0.224691	0	0
AD	AR	19	7249360	8199016	2704	323	-0.578007	-1	-0.06892	0.334092	0.00846	1	0.0276319	0	1
AD	AR	19	8199017	9105577	2310	295	0.0705991	-0.61085	0.80517	0.00498423	0	0.81445	0.799507	0	0
AD	AR	19	13213187	13968319	1831	290	0.159403	-0.22961	0.56846	0.0254092	0	0.32699	0.396884	0	0
AD	AR	19	14891101	15650185	2250	280	0.0137391	-0.46548	0.48172	0.000188763	0	0.31496	0.948768	0	0
AD	AR	19	16079007	17045963	2308	253	0.777182	0.08505	1	0.604012	0.01556	1	0.037431	1	1
AD	AR	19	17750519	18504867	1938	278	0.0230225	-0.75481	0.80012	0.000530038	0	0.95243	0.93879	0	0
AD	AR	19	18504868	19749166	2720	296	-0.356013	-0.80675	0.00834	0.126745	0	0.65085	0.058482	0	0
AD	AR	19	19749167	20485499	2171	193	0.286863	-0.2237	0.922	0.0822903	0	0.85009	0.246129	0	0
AD	AR	19	20485500	21155862	2112	105	0.706252	0.01561	1	0.498793	0.00839	1	0.0468112	1	1
AD	AR	19	30375793	31763008	2912	351	0.17508	-0.5924	1	0.030653	0	1	0.590607	0	1
AD	AR	19	31763009	33028099	3030	333	-0.16476	-1	0.87166	0.0271458	0	1	0.68389	0	1
AD	AR	19	33028100	33785835	2542	231	0.124768	-0.30781	0.58516	0.0155672	0	0.35099	0.545988	0	0
AD	AR	19	33785836	34633274	2582	303	-0.262595	-0.73478	0.12948	0.0689561	0	0.5399	0.185379	0	0
AD	AR	19	35649344	36638122	2617	323	-0.144663	-0.77684	0.4232	0.0209274	0	0.6345	0.578336	0	0
AD	AR	19	38472871	39370419	2502	264	0.0676519	-0.40775	0.56129	0.00457678	0	0.34243	0.756592	0	0
AD	AR	19	39370420	40171413	2247	269	-0.0470196	-0.44887	0.34968	0.00221084	0	0.23008	0.802976	0	0
AD	AR	19	40171414	41004105	2168	243	0.0977642	-0.48869	0.74158	0.00955784	0	0.61988	0.707282	0	0
AD	AR	19	43960959	45040932	3073	290	0.0602199	-0.1505	0.27881	0.00362644	0	0.07865	0.57414	0	0
AD	AR	19	45040933	45893307	2167	318	-0.173854	-0.34204	-0.01871	0.0302252	0.00077	0.11699	0.0303626	0	0
AD	AR	19	45893308	46765060	2273	284	-0.0396802	-0.47837	0.35616	0.00157452	0	0.28948	0.82224	0	0
AD	AR	19	46765061	47752727	2330	323	0.317715	-0.01662	0.73395	0.100943	0	0.53868	0.05751	0	0
AD	AR	19	47752728	48573065	2248	273	-0.191941	-0.62376	0.19999	0.0368413	0	0.38913	0.320588	0	0
AD	AR	19	49415190	50451925	2505	325	-0.135822	-0.80492	0.43846	0.0184476	0	0.69649	0.609227	0	0
AD	AR	19	50451926	51259178	1948	296	0.156014	-0.24132	0.58615	0.0243404	0	0.3462	0.424889	0	0
AD	AR	19	51259179	51903804	1780	303	0.0501403	-0.25763	0.36257	0.00251405	0	0.13844	0.73696	0	0
AD	AR	19	51903805	52678748	2873	304	-0.0562163	-0.65692	0.47884	0.00316028	0	0.50109	0.819541	0	0
AD	AR	19	52678749	53431217	2681	290	0.530857	-0.02957	1	0.28181	0	1	0.064081	0	1
AD	AR	19	54042241	54602370	1467	284	-0.225451	-0.78752	0.24663	0.0508283	0	0.62089	0.317905	0	0
AD	AR	19	54602371	55182973	1860	289	0.0417219	-0.39578	0.50087	0.00174072	0	0.28813	0.842914	0	0
AD	AR	19	55714086	56411086	2132	347	-0.206527	-0.59231	0.14399	0.0426535	0	0.35113	0.242689	0	0
AD	AR	20	60795	884241	2552	361	-0.453988	-0.9337	-0.08461	0.206105	0.00878	0.87179	0.0165872	0	0
AD	AR	20	884242	1771285	2562	339	0.217674	-0.32509	0.88185	0.0473818	0	0.78844	0.39272	0	0
AD	AR	20	3736552	4591847	2585	303	-0.123286	-0.74325	0.41446	0.0151995	0	0.58123	0.627246	0	0
AD	AR	20	4591848	5379450	2294	285	0.263036	-0.20292	0.86153	0.0691878	0	0.74231	0.257434	0	0
AD	AR	20	5379451	6128358	2323	289	-0.189078	-0.96435	0.42395	0.0357503	0	0.97053	0.501313	0	0
AD	AR	20	6128359	7231796	2828	303	0.307244	-0.15211	0.90863	0.0943991	0	0.82561	0.179348	0	0
AD	AR	20	7959829	9279550	3445	343	-0.457981	-1	0.09457	0.209747	0	1	0.105219	0	1
AD	AR	20	10279604	11257012	2776	323	-0.0385575	-0.57822	0.49205	0.00148668	0	0.41544	0.869164	0	0
AD	AR	20	15238520	15962576	2236	285	0.176585	-0.54556	1	0.0311824	0	1	0.577814	0	1
AD	AR	20	15962577	16661516	2631	271	0.00832266	-0.79613	0.79594	6.93e-05	0	1	0.978623	0	0
AD	AR	20	16661517	17359290	2299	280	0.580939	0.07251	1	0.33749	0.00892	1	0.0271929	1	1
AD	AR	20	17359291	18058524	2191	277	-0.127595	-0.75142	0.42461	0.0162805	0	0.60295	0.614917	0	0
AD	AR	20	21682378	22780956	2443	261	0.33698	-0.31571	1	0.113556	0	1	0.271151	0	1
AD	AR	20	22780957	23808562	3129	306	-1	-1	-0.13116	1	0.02709	1	0.0198766	0	1
AD	AR	20	30569660	32484506	3586	335	0.170236	-0.27648	0.67481	0.0289802	0	0.46027	0.434857	0	0
AD	AR	20	35990262	37253657	2778	331	0.025429	-0.53473	0.64154	0.000646636	0	0.52583	0.919574	0	0
AD	AR	20	41351515	42185671	2234	313	0.0218873	-0.55722	0.61436	0.000479053	0	0.49092	0.931771	0	0
AD	AR	20	42185672	43008890	2239	298	-0.2185	-1	0.48075	0.0477422	0	1	0.479258	0	1
AD	AR	20	45673604	46486132	2009	276	0.315821	-0.2159	1	0.0997427	0	1	0.217495	0	1
AD	AR	20	46486133	47203836	2075	273	0.105284	-0.34748	0.5992	0.0110848	0	0.37191	0.624288	0	0
AD	AR	20	49236419	50653620	4072	365	0.440678	-0.23056	1	0.194197	0	1	0.176074	0	1
AD	AR	20	51533751	52411532	2114	338	0.407359	-0.04736	1	0.165941	0	1	0.0776399	0	1
AD	AR	20	52411533	53120334	2355	264	0.391073	0.01873	0.84451	0.152938	0.00236	0.7132	0.0392748	1	0
AD	AR	20	53120335	53879803	2109	212	-0.171471	-1	0.74491	0.0294023	0	1	0.639669	0	1
AD	AR	20	53879804	54743694	2348	246	0.175866	-0.62778	1	0.0309288	0	1	0.606563	0	1
AD	AR	20	56951774	57924037	2327	339	-0.133512	-0.8317	0.4688	0.0178253	0	0.72228	0.620437	0	0
AD	AR	20	58780895	59560457	2390	287	-0.63066	-1	0.01984	0.397732	0	1	0.0559512	0	1
AD	AR	21	18222038	19479024	3470	327	0.435359	-0.15682	1	0.189537	0	1	0.138224	0	1
AD	AR	21	20407308	21632916	3990	300	-0.396141	-1	0.11489	0.156927	0	1	0.118673	0	1
AD	AR	21	21632917	22201890	2158	249	0.114386	-0.27788	0.54159	0.0130842	0	0.29855	0.556511	0	0
AD	AR	21	22201891	23266941	3269	280	-0.26583	-1	0.47474	0.0706656	0	1	0.418946	0	1
AD	AR	21	23266942	24055941	2100	277	0.0565111	-0.66651	0.83288	0.0031935	0	0.91107	0.851196	0	0
AD	AR	21	26467827	27774350	3396	303	-0.150892	-0.75435	0.36191	0.0227684	0	0.59691	0.536457	0	0
AD	AR	21	27774351	28616539	2692	265	-0.273222	-0.73463	0.13513	0.07465	0	0.53968	0.174868	0	0
AD	AR	21	29449871	30847296	3470	205	-0.440821	-1	0.32965	0.194323	0	1	0.225946	0	1
AD	AR	21	33270273	34383794	2754	302	-0.22947	-0.85841	0.27847	0.0526564	0	0.73982	0.350666	0	0
AD	AR	21	38046450	39252059	3427	313	0.579446	-0.03485	1	0.335757	0	1	0.0650993	0	1
AD	AR	21	42187153	43081434	2674	353	-0.446774	-1	-0.03737	0.199607	0.00442	1	0.030813	0	1
AD	AR	21	43081435	43812791	2953	359	0.132708	-0.53829	0.96111	0.0176114	0	0.99615	0.648516	0	0
AD	AR	21	44815009	46045433	3372	352	0.033775	-0.45653	0.54973	0.00114075	0	0.39389	0.879069	0	0
AD	AR	22	16050213	17587474	1038	154	0.247519	-0.79588	1	0.0612657	0	1	0.559991	0	1
AD	AR	22	17587475	18535225	3048	343	-0.336817	-0.86516	0.08232	0.113445	0	0.74851	0.115094	0	0
AD	AR	22	19635655	20969184	2575	315	-0.131937	-0.88198	0.49956	0.0174075	0	0.82121	0.637993	0	0
AD	AR	22	20969185	22404422	2447	248	0.191678	-0.26448	0.72788	0.0367404	0	0.53439	0.385967	0	0
AD	AR	22	25282437	26166934	2225	282	0.377609	-0.17679	1	0.142589	0	1	0.174671	0	1
AD	AR	22	27192924	27952441	2729	365	0.280111	-0.18212	0.92423	0.0784619	0	0.85934	0.22021	0	0
AD	AR	22	32662294	33501725	2886	299	0.197433	-0.26941	0.71761	0.0389797	0	0.51712	0.369557	0	0
AD	AR	22	33501726	34361897	2779	309	0.603636	-0.01746	1	0.364376	0	1	0.0576153	0	1
AD	AR	22	35368342	36135968	2318	279	-0.127572	-0.87792	0.50114	0.0162747	0	0.85823	0.648924	0	0
AD	AR	22	36135969	37364004	3258	335	-0.0185846	-1	0.92404	0.000345386	0	1	0.957589	0	1
AD	AR	22	37364005	38718589	3428	359	0.458553	-0.05412	1	0.210271	0	1	0.0814531	0	1
AD	AR	22	38718590	40378783	3496	352	-0.529997	-1	-0.01611	0.280897	0.00521	1	0.0437452	0	1
AD	AR	22	42867928	43574017	2040	246	-0.0230355	-0.62831	0.59167	0.000530635	0	0.58419	0.927905	0	0
AD	AR	22	48269178	48977538	2555	337	0.0165562	-0.74115	0.75179	0.000274107	0	0.86099	0.955233	0	0
AD	AR	22	49559208	50347996	2982	302	0.0154623	-0.49525	0.52528	0.000239084	0	0.367	0.945833	0	0
AD	AR	22	50347997	51244236	2731	309	-0.392632	-1	0.22156	0.15416	0	1	0.191881	0	1
AD	ASTHMA	1	2215496	2983519	1983	283	-0.139953	-1	0.84364	0.0195869	0	1	0.719839	0	1
AD	ASTHMA	1	2983520	3582047	1852	287	0.391452	-0.16326	1	0.153235	0	1	0.160585	0	1
AD	ASTHMA	1	3582048	4281476	2051	240	0.111672	-0.45796	0.74778	0.0124706	0	0.59767	0.672595	0	0
AD	ASTHMA	1	4773404	5362404	2077	296	-0.177539	-0.95215	0.41234	0.0315199	0	0.95808	0.511022	0	0
AD	ASTHMA	1	5362405	6136814	2158	299	-0.414164	-1	0.16463	0.171532	0	1	0.151682	0	1
AD	ASTHMA	1	8580988	9475966	2133	322	-0.159356	-0.45727	0.12151	0.0253942	0	0.20941	0.262848	0	0
AD	ASTHMA	1	9475967	10753427	2714	287	0.270914	-0.32531	1	0.0733946	0	1	0.328399	0	1
AD	ASTHMA	1	10753428	11709173	2203	280	0.334363	-0.28548	1	0.111798	0	1	0.254089	0	1
AD	ASTHMA	1	11709174	13481025	3054	311	0.0448745	-0.58328	0.69629	0.00201372	0	0.65114	0.862188	0	0
AD	ASTHMA	1	13481026	14720131	3101	335	-0.0828691	-1	0.79843	0.0068673	0	1	0.808647	0	1
AD	ASTHMA	1	15755231	16732168	2606	249	-0.615509	-1	0.1769	0.378851	0	1	0.117038	0	1
AD	ASTHMA	1	16732169	17557746	1259	202	-0.0334978	-0.81582	0.73053	0.0011221	0	0.98046	0.913436	0	0
AD	ASTHMA	1	18427821	19238924	2609	340	0.512523	0.06204	1	0.26268	0.00756	1	0.0307411	1	1
AD	ASTHMA	1	20556203	21416121	2172	254	-0.375587	-1	0.23481	0.141066	0	1	0.213624	0	1
AD	ASTHMA	1	21416122	22145629	2081	263	0.394786	-0.23353	1	0.155856	0	1	0.196124	0	1
AD	ASTHMA	1	23907046	25885138	3833	362	0.396264	-0.09279	1	0.157025	0	1	0.102174	0	1
AD	ASTHMA	1	29188427	30405182	2790	325	0.156827	-0.34802	0.77869	0.0245948	0	0.62423	0.512242	0	0
AD	ASTHMA	1	30405183	31639217	3694	326	0.35268	-0.06475	0.88284	0.124383	0	0.7794	0.0962692	0	0
AD	ASTHMA	1	34371023	35201626	2449	314	0.276388	-0.30587	1	0.0763901	0	1	0.319872	0	1
AD	ASTHMA	1	38474037	40200950	3839	352	0.0327543	-0.50766	0.58939	0.00107284	0	0.42789	0.891716	0	0
AD	ASTHMA	1	54771294	55727134	2917	333	0.205985	-0.11765	0.56194	0.0424297	0	0.31577	0.20862	0	0
AD	ASTHMA	1	56799637	57529670	2112	272	-0.296053	-0.93743	0.19739	0.0876473	0	0.8849	0.229447	0	0
AD	ASTHMA	1	57529671	58387483	2473	278	0.157825	-0.45575	0.91487	0.0249089	0	0.90507	0.571738	0	0
AD	ASTHMA	1	59889046	61377615	3349	324	0.157157	-0.41875	0.86605	0.0246984	0	0.78864	0.557475	0	0
AD	ASTHMA	1	67761891	68633860	2188	278	0.0733272	-0.42234	0.5862	0.00537688	0	0.37833	0.746191	0	0
AD	ASTHMA	1	68633861	69438909	2133	235	-1	-1	-0.49913	1	0.24913	1	5.29e-05	0	1
AD	ASTHMA	1	70992906	72513119	3263	270	0.186292	-0.30677	0.79579	0.0347046	0	0.63837	0.440841	0	0
AD	ASTHMA	1	72513120	73992170	3580	220	0.386938	-0.30589	1	0.149721	0	1	0.230933	0	1
AD	ASTHMA	1	73992171	75132092	2195	244	0.133013	-0.6693	1	0.0176924	0	1	0.692931	0	1
AD	ASTHMA	1	82123369	83461215	3578	312	0.670479	0.03689	1	0.449542	0.00934	1	0.040314	1	1
AD	ASTHMA	1	87667573	88656689	2244	319	0.616268	0.1126	1	0.379786	0.0154	1	0.0202247	1	1
AD	ASTHMA	1	89753965	90941549	2519	309	-0.124705	-0.68889	0.39	0.0155514	0	0.5064	0.601102	0	0
AD	ASTHMA	1	90941550	91870059	2432	281	1	0.30728	1	1	0.09579	1	0.00268769	1	1
AD	ASTHMA	1	91870060	92904465	2654	273	-0.265949	-0.68282	0.09902	0.070729	0	0.46624	0.154264	0	0
AD	ASTHMA	1	99425001	100269207	2471	265	-0.579894	-1	-0.18183	0.336277	0.03348	1	0.0048227	0	1
AD	ASTHMA	1	109271450	110224230	2301	282	1	0.29995	1	1	0.09278	1	0.00546433	1	1
AD	ASTHMA	1	110224231	111134062	2136	312	-0.277536	-1	0.37863	0.0770262	0	1	0.368782	0	1
AD	ASTHMA	1	116207298	117046311	2239	250	-0.0264207	-1	1	0.000698054	0	1	0.944082	0	1
AD	ASTHMA	1	117046312	118118667	2203	303	0.580581	0.04356	1	0.337074	0.00699	1	0.0358057	1	1
AD	ASTHMA	1	149716038	151146407	2390	205	0.0597892	-0.41489	0.54469	0.00357475	0	0.33687	0.785673	0	0
AD	ASTHMA	1	151146408	152535630	2480	281	0.0631637	-0.28044	0.43459	0.00398965	0	0.20524	0.696668	0	0
AD	ASTHMA	1	152535631	153410809	2188	220	0.029746	-0.53066	0.61426	0.000884823	0	0.53779	0.898484	0	0
AD	ASTHMA	1	154685546	156813845	3472	373	-0.144105	-1	0.69482	0.0207661	0	1	0.675942	0	1
AD	ASTHMA	1	156813846	158081627	3586	340	-0.205335	-1	0.56734	0.0421625	0	1	0.535507	0	1
AD	ASTHMA	1	158900370	159882515	2529	266	-0.745044	-1	-0.18342	0.555091	0.03557	1	0.0130412	0	1
AD	ASTHMA	1	159882516	161054076	2958	334	-0.00161897	-0.5092	0.5071	2.62e-06	0	0.36499	0.994384	0	0
AD	ASTHMA	1	161054077	161945442	2048	245	-0.329063	-0.73897	0.01416	0.108283	0	0.54608	0.061897	0	0
AD	ASTHMA	1	164726580	165553812	2600	309	-0.928664	-1	-0.23196	0.862417	0.05856	1	0.012869	0	1
AD	ASTHMA	1	165553813	166458031	2254	282	0.488883	-0.12007	1	0.239007	0	1	0.108778	0	1
AD	ASTHMA	1	167163955	168179086	2467	302	-0.520344	-1	-0.1032	0.270758	0.01135	1	0.0153384	0	1
AD	ASTHMA	1	170193208	171044255	2107	230	0.174328	-0.41865	0.88046	0.0303903	0	0.82466	0.521162	0	0
AD	ASTHMA	1	172465154	173582511	2132	284	0.147521	-0.11105	0.42051	0.0217626	0	0.17683	0.257999	0	0
AD	ASTHMA	1	173582512	175385220	3600	200	0.305183	-0.56497	1	0.0931368	0	1	0.423412	0	1
AD	ASTHMA	1	186179448	187072605	2212	209	-0.0296718	-0.6584	0.60055	0.000880418	0	0.57651	0.912693	0	0
AD	ASTHMA	1	193575517	194365688	2492	186	-0.262289	-1	0.98036	0.0687955	0	1	0.575096	0	1
AD	ASTHMA	1	195161236	196179110	2548	244	0.478597	-0.26183	1	0.229055	0	1	0.165086	0	1
AD	ASTHMA	1	200134006	201067952	2512	262	0.662895	0.05896	1	0.43943	0.00955	1	0.0347266	1	1
AD	ASTHMA	1	202583885	204092537	3624	367	0.0703276	-0.50162	0.71027	0.00494598	0	0.62213	0.769711	0	0
AD	ASTHMA	1	204092538	205009623	2654	292	0.178239	-0.24586	0.65642	0.031769	0	0.4358	0.381748	0	0
AD	ASTHMA	1	205917549	208162951	3957	352	-0.0751832	-0.48721	0.32778	0.00565251	0	0.25615	0.686821	0	0
AD	ASTHMA	1	211082893	212347582	3892	288	-1	-1	-0.33855	1	0.11487	1	0.000487848	0	1
AD	ASTHMA	1	212347583	213958292	4115	342	0.105218	-0.51651	0.8014	0.0110709	0	0.73573	0.701603	0	0
AD	ASTHMA	1	213958293	214783872	2324	290	-0.0225671	-0.8042	0.74517	0.000509276	0	0.93202	0.942094	0	0
AD	ASTHMA	1	215825792	216658126	2225	277	-0.0351345	-0.73966	0.66601	0.00123443	0	0.81571	0.898619	0	0
AD	ASTHMA	1	216658127	217352165	2061	274	-0.394002	-1	0.20596	0.155238	0	1	0.183768	0	1
AD	ASTHMA	1	217352166	218563960	3827	301	-0.193411	-1	0.72401	0.0374077	0	1	0.618101	0	1
AD	ASTHMA	1	229075157	230227247	2378	331	-0.199156	-0.97152	0.37956	0.0396633	0	0.99036	0.462089	0	0
AD	ASTHMA	1	230227248	231287764	3799	349	0.331927	-0.34472	1	0.110176	0	1	0.293424	0	1
AD	ASTHMA	1	231287765	232177704	2186	287	0.188678	-0.54328	1	0.0355996	0	1	0.558874	0	1
AD	ASTHMA	1	232177705	232954942	2429	306	0.00726207	-0.4191	0.4446	5.27e-05	0	0.25222	0.970787	0	0
AD	ASTHMA	1	232954943	233639473	2165	243	0.35785	-0.20517	1	0.128057	0	1	0.197205	0	1
AD	ASTHMA	1	234365797	235097113	2144	309	0.247512	-0.12376	0.66615	0.0612623	0	0.44383	0.188579	0	0
AD	ASTHMA	1	235097114	236199671	2294	266	0.104741	-0.35988	0.62526	0.0109706	0	0.40459	0.632714	0	0
AD	ASTHMA	1	241813535	242417923	1900	250	-0.0920428	-0.5363	0.3313	0.00847187	0	0.29821	0.64879	0	0
AD	ASTHMA	1	242417924	243048003	2034	249	0.323721	-0.34891	1	0.104796	0	1	0.305035	0	1
AD	ASTHMA	1	243048004	244723196	3112	340	-0.0994445	-0.51842	0.29865	0.00988922	0	0.27634	0.604535	0	0
AD	ASTHMA	1	247531113	248341594	2692	278	0.606619	0.18398	1	0.367987	0.03408	1	0.00710458	1	1
AD	ASTHMA	2	10181	789195	2226	254	0.213179	-0.71324	1	0.0454455	0	1	0.57075	0	1
AD	ASTHMA	2	1875061	2680063	2469	299	0.357115	-0.07243	0.92228	0.127531	0	0.8506	0.10531	0	0
AD	ASTHMA	2	2680064	3314202	2156	296	0.0790192	-0.64924	0.87675	0.00624403	0	0.95482	0.795922	0	0
AD	ASTHMA	2	4016105	4766969	2096	233	0.104818	-0.77496	1	0.0109869	0	1	0.763448	0	1
AD	ASTHMA	2	5568654	6306606	2455	292	0.00769801	-1	1	5.93e-05	0	1	0.983149	0	1
AD	ASTHMA	2	7966710	8978798	2281	312	0.223647	-0.03752	0.49434	0.050018	0	0.24437	0.0851013	0	0
AD	ASTHMA	2	8978799	9960670	2153	264	0.0235205	-0.55877	0.63629	0.000553216	0	0.56312	0.923884	0	0
AD	ASTHMA	2	13625451	14692120	3252	261	0.392844	-0.11865	1	0.154327	0	1	0.128001	0	1
AD	ASTHMA	2	20064518	21084898	2714	331	-0.141284	-0.84082	0.45677	0.0199612	0	0.76487	0.5964	0	0
AD	ASTHMA	2	25895395	26894102	2257	281	-0.500443	-1	0.0756	0.250443	0	1	0.0802974	0	1
AD	ASTHMA	2	28819511	29627932	2316	274	-0.147827	-0.63214	0.2842	0.0218529	0	0.411	0.482907	0	0
AD	ASTHMA	2	29627933	30575619	2746	301	-0.220393	-0.88043	0.30353	0.0485729	0	0.79799	0.37692	0	0
AD	ASTHMA	2	30575620	31457418	2957	289	0.331657	-0.32583	1	0.109997	0	1	0.282498	0	1
AD	ASTHMA	2	33735319	34239776	2117	206	-0.0219456	-1	1	0.000481611	0	1	0.952296	0	1
AD	ASTHMA	2	36120744	36867389	2379	275	0.309222	-0.15706	0.99921	0.0956182	0	1	0.187775	0	0
AD	ASTHMA	2	38887394	40087418	2483	278	-0.0112024	-0.74353	0.72654	0.000125494	0	0.82334	0.969892	0	0
AD	ASTHMA	2	45850048	46499326	2185	346	0.0958248	-0.51277	0.75804	0.0091824	0	0.62849	0.721382	0	0
AD	ASTHMA	2	52494112	53032976	2088	168	0.233477	-0.65938	1	0.0545116	0	1	0.536304	0	1
AD	ASTHMA	2	65938003	67224027	3245	322	0.275688	-0.43509	1	0.0760039	0	1	0.390016	0	1
AD	ASTHMA	2	71385814	72160302	2280	278	0.453978	0.15029	0.81865	0.206096	0.02259	0.67018	0.00494903	1	0
AD	ASTHMA	2	72160303	73544290	2321	275	-1.72e-05	-1	1	2.96e-10	0	1	0.999968	0	1
AD	ASTHMA	2	73544291	75148103	3012	302	-0.102627	-0.85819	0.55732	0.0105323	0	0.81857	0.717783	0	0
AD	ASTHMA	2	75942398	76649030	2257	219	0.0392465	-0.73504	0.8654	0.00154029	0	1	0.899047	0	0
AD	ASTHMA	2	86867033	88547312	1106	183	0.220628	-0.46723	1	0.0486767	0	1	0.465666	0	1
AD	ASTHMA	2	101556800	102494487	2288	274	-0.157131	-0.52749	0.18587	0.0246902	0	0.28008	0.361875	0	0
AD	ASTHMA	2	110097869	112644828	3043	331	-0.02911	-0.37972	0.31186	0.000847391	0	0.16364	0.860111	0	0
AD	ASTHMA	2	118663654	119635489	2637	272	0.422282	-0.40962	1	0.178322	0	1	0.274331	0	1
AD	ASTHMA	2	121073753	122026817	2407	313	-0.0703621	-0.7161	0.5194	0.00495082	0	0.60934	0.786162	0	0
AD	ASTHMA	2	126754028	127895644	3472	299	-0.0482634	-0.50642	0.3897	0.00232936	0	0.32595	0.796413	0	0
AD	ASTHMA	2	127895645	129486897	4545	342	-0.49405	-1	0.02653	0.244085	0	1	0.0639752	0	1
AD	ASTHMA	2	129486898	130485398	2841	263	-0.194162	-0.63989	0.20628	0.037699	0	0.4126	0.323632	0	0
AD	ASTHMA	2	133352951	134359059	2374	314	-0.0180946	-0.85203	0.76294	0.000327415	0	1	0.953827	0	0
AD	ASTHMA	2	135160198	137061003	3285	206	0.338298	-0.02143	0.80398	0.114446	0	0.64639	0.0658993	0	0
AD	ASTHMA	2	142494981	143259780	2246	249	-0.371158	-1	0.47812	0.137758	0	1	0.334172	0	1
AD	ASTHMA	2	144503689	145977920	2240	314	-0.225607	-1	0.41678	0.0508987	0	1	0.448241	0	1
AD	ASTHMA	2	160200380	161432089	3539	265	0.0968507	-0.50638	0.76419	0.00938005	0	0.67034	0.716879	0	0
AD	ASTHMA	2	161432090	163607635	4455	334	-0.493805	-1	0.14356	0.243843	0	1	0.127108	0	1
AD	ASTHMA	2	164702313	165917788	2548	267	-0.122578	-0.89621	0.55052	0.0150254	0	0.9069	0.675493	0	0
AD	ASTHMA	2	168437446	169224445	2197	273	-0.156404	-0.5646	0.23074	0.0244623	0	0.32138	0.403314	0	0
AD	ASTHMA	2	169224446	170155561	2558	301	0.301875	-0.26476	1	0.0911285	0	1	0.265682	0	1
AD	ASTHMA	2	170865766	171566482	2310	291	-0.094656	-0.63619	0.42893	0.00895976	0	0.44362	0.690225	0	0
AD	ASTHMA	2	174118390	174927563	2158	311	-0.132288	-0.48712	0.20143	0.0175002	0	0.2377	0.431588	0	0
AD	ASTHMA	2	182307878	183352290	2608	268	0.653597	0.1096	1	0.427189	0.01479	1	0.0194872	1	1
AD	ASTHMA	2	189882703	191051954	2544	216	-0.412799	-1	0.22049	0.170403	0	1	0.17197	0	1
AD	ASTHMA	2	191051955	193033982	4062	343	0.739363	0.13611	1	0.546658	0.02524	1	0.0177983	1	1
AD	ASTHMA	2	196446300	198140350	4108	287	0.522062	-0.02651	1	0.272548	0	1	0.0612448	0	1
AD	ASTHMA	2	202504863	203639686	2259	291	0.228348	-0.3667	1	0.052143	0	1	0.407343	0	1
AD	ASTHMA	2	203639687	205038119	2907	276	-0.0521868	-0.45658	0.33855	0.00272346	0	0.23613	0.777625	0	0
AD	ASTHMA	2	215002485	215899570	2352	251	0.072821	-0.87652	1	0.0053029	0	1	0.839766	0	1
AD	ASTHMA	2	224123080	224938731	2158	249	0.464425	0.1097	0.90205	0.21569	0.01339	0.81369	0.0114988	1	0
AD	ASTHMA	2	226242843	227557841	2907	300	0.140037	-0.58775	1	0.0196103	0	1	0.656722	0	1
AD	ASTHMA	2	227557842	228812485	4020	317	-0.426199	-1	0.19419	0.181645	0	1	0.16096	0	1
AD	ASTHMA	2	228812486	229764918	2504	267	0.179755	-0.40863	0.988	0.0323118	0	1	0.514801	0	0
AD	ASTHMA	2	231847387	233352722	3967	325	0.528365	-0.14474	1	0.279169	0	1	0.119332	0	1
AD	ASTHMA	2	234945578	235625789	2492	299	-0.333902	-0.89776	0.09838	0.11149	0	0.80597	0.126848	0	0
AD	ASTHMA	2	237194298	238185482	2742	290	0.0315694	-0.40622	0.4793	0.000996629	0	0.275	0.876996	0	0
AD	ASTHMA	2	240325601	241113279	2732	327	0.395125	-0.27788	1	0.156124	0	1	0.211839	0	1
AD	ASTHMA	2	241113280	241910366	2897	309	-0.369646	-0.99464	0.11607	0.136638	0	0.9893	0.114572	0	0
AD	ASTHMA	3	2140012	3128152	3342	377	-0.0881151	-0.79209	0.54214	0.00776427	0	0.72572	0.746504	0	0
AD	ASTHMA	3	4109394	4835083	2198	315	-0.228814	-0.6375	0.14308	0.052356	0	0.40645	0.215863	0	0
AD	ASTHMA	3	4835084	5496182	1864	325	0.163979	-0.19231	0.54737	0.0268891	0	0.30011	0.35131	0	0
AD	ASTHMA	3	6421146	7529554	3433	305	-0.573805	-1	0.01682	0.329252	0	1	0.0640368	0	1
AD	ASTHMA	3	7529555	8664892	4002	337	-0.196578	-1	0.41034	0.038643	0	1	0.482442	0	1
AD	ASTHMA	3	9970732	11226367	3663	364	0.933721	0.11283	1	0.871834	0.02226	1	0.0307473	1	1
AD	ASTHMA	3	11226368	11997658	2040	276	0.0334078	-0.58376	0.66563	0.00111608	0	0.59273	0.899551	0	0
AD	ASTHMA	3	14312008	15150876	2466	322	0.293241	-0.20485	0.92084	0.0859902	0	0.84859	0.235704	0	0
AD	ASTHMA	3	16084006	17182494	3316	322	-0.437425	-1	0.03673	0.19134	0	1	0.0757076	0	1
AD	ASTHMA	3	17182495	19030988	4179	302	-0.135074	-0.77578	0.40875	0.0182451	0	0.63389	0.587567	0	0
AD	ASTHMA	3	20754843	21790867	3813	314	-0.0931942	-0.99976	0.73059	0.00868516	0	1	0.775803	0	0
AD	ASTHMA	3	22648002	23426044	2339	192	-0.315442	-1	0.54801	0.0995039	0	1	0.402151	0	1
AD	ASTHMA	3	25516194	26905340	3611	297	0.258267	-0.50379	1	0.0667019	0	1	0.447916	0	1
AD	ASTHMA	3	27614909	28649810	2444	255	-0.546677	-1	-0.01217	0.298856	0.00486	1	0.0467396	0	1
AD	ASTHMA	3	28649811	29877022	4114	344	-0.00730403	-0.72543	0.70231	5.33e-05	0	0.77198	0.979987	0	0
AD	ASTHMA	3	32378806	33020868	1856	214	-0.536623	-1	-0.09971	0.287964	0.01141	1	0.0188479	0	1
AD	ASTHMA	3	33991870	35009559	2620	260	-0.763861	-1	-0.10592	0.583483	0.01658	1	0.0281389	0	1
AD	ASTHMA	3	38729768	39605996	2745	226	-0.561421	-1	0.06202	0.315193	0	1	0.0785417	0	1
AD	ASTHMA	3	45844192	47588461	3840	272	0.0442665	-0.69251	0.80364	0.00195952	0	0.89839	0.881209	0	0
AD	ASTHMA	3	54074845	54892586	2206	308	0.204662	-0.62298	1	0.0418867	0	1	0.562592	0	1
AD	ASTHMA	3	58557719	59998583	3721	351	-0.127799	-1	0.69181	0.0163325	0	1	0.696141	0	1
AD	ASTHMA	3	66702085	67454740	2392	240	0.0717561	-0.7889	1	0.00514894	0	1	0.834841	0	1
AD	ASTHMA	3	67454741	68319770	2234	244	0.0151528	-0.91538	1	0.000229608	0	1	0.964532	0	1
AD	ASTHMA	3	71223282	72334704	3054	375	0.412807	0.11696	0.80506	0.170409	0.01385	0.64812	0.00751237	1	0
AD	ASTHMA	3	72334705	73606612	2952	353	-0.225914	-1	0.36982	0.0510373	0	1	0.418548	0	1
AD	ASTHMA	3	80385709	81431496	2567	193	0.149934	-0.90951	1	0.0224801	0	1	0.710819	0	1
AD	ASTHMA	3	87411259	88375763	2541	191	-0.0311895	-1	1	0.000972783	0	1	0.941419	0	1
AD	ASTHMA	3	104878978	106174685	3978	301	-0.730831	-1	-0.02403	0.534114	0.00998	1	0.0487526	0	1
AD	ASTHMA	3	112408514	113657665	3598	280	0.145522	-0.43277	0.81998	0.0211768	0	0.71762	0.582879	0	0
AD	ASTHMA	3	118903054	119759983	2330	251	0.261975	-0.20334	0.82626	0.068631	0	0.68467	0.25211	0	0
AD	ASTHMA	3	119759984	120574477	2286	255	0.203465	-0.53562	1	0.0413982	0	1	0.516232	0	1
AD	ASTHMA	3	125992651	127495173	4268	333	-0.461622	-1	-0.02784	0.213095	0.00388	1	0.0448589	0	1
AD	ASTHMA	3	137372142	138693846	2473	273	0.102987	-0.68099	1	0.0106063	0	1	0.752175	0	1
AD	ASTHMA	3	141034638	141898978	2197	264	-0.311426	-0.84109	0.11035	0.0969863	0	0.70926	0.135815	0	0
AD	ASTHMA	3	148638309	149998411	3799	342	0.58451	-0.00168	1	0.341652	0	1	0.0498664	0	1
AD	ASTHMA	3	149998412	151131307	2603	305	-0.840665	-1	-0.37689	0.706718	0.14205	1	0.000667324	0	1
AD	ASTHMA	3	151131308	151904021	2285	240	0.102098	-0.55695	0.87359	0.010424	0	0.89562	0.723757	0	0
AD	ASTHMA	3	156795411	157633700	2176	201	-0.226454	-1	0.41361	0.0512812	0	1	0.428877	0	1
AD	ASTHMA	3	167118894	168972662	4034	335	-0.604515	-1	-0.13787	0.365438	0.02084	1	0.0138025	0	1
AD	ASTHMA	3	168972663	170174578	2894	300	0.206109	-0.32907	0.96874	0.042481	0	0.96884	0.426773	0	0
AD	ASTHMA	3	172004761	173415591	3333	341	-0.890722	-1	-0.24668	0.793386	0.06127	1	0.00857295	0	1
AD	ASTHMA	3	175671425	176931163	3494	299	-0.0200513	-0.53572	0.48694	0.000402056	0	0.37814	0.927657	0	0
AD	ASTHMA	3	178110323	179372165	3176	284	0.57806	-0.12103	1	0.334154	0	1	0.10115	0	1
AD	ASTHMA	3	181424324	183203155	3385	342	0.157335	-0.34687	0.76479	0.0247544	0	0.62524	0.502333	0	0
AD	ASTHMA	3	185709997	186602045	2223	329	0.147011	-0.1886	0.51426	0.0216124	0	0.26565	0.381095	0	0
AD	ASTHMA	3	186602046	187939199	4118	389	0.0702514	-0.30802	0.4666	0.00493525	0	0.23123	0.686296	0	0
AD	ASTHMA	3	187939200	189451805	3811	367	0.0961292	-0.23639	0.46235	0.00924082	0	0.21791	0.553315	0	0
AD	ASTHMA	3	196383153	197147990	2209	295	-0.0253003	-0.5043	0.44327	0.000640106	0	0.3248	0.90477	0	0
AD	ASTHMA	4	1529268	2468935	2346	284	-0.0387708	-0.37233	0.2938	0.00150317	0	0.15355	0.810456	0	0
AD	ASTHMA	4	3549230	4266178	2158	295	-0.196147	-0.64056	0.20024	0.0384738	0	0.41157	0.31412	0	0
AD	ASTHMA	4	4266179	5051834	2657	323	0.231184	-0.77417	1	0.0534459	0	1	0.56142	0	1
AD	ASTHMA	4	7726035	8309826	2243	318	0.0389866	-0.70071	0.83596	0.00151996	0	0.88858	0.895866	0	0
AD	ASTHMA	4	8882617	9482867	313	17	0.244262	-1	1	0.0596638	0	1	0.625728	0	1
AD	ASTHMA	4	10370667	11050119	2198	251	0.376065	-0.2157	1	0.141425	0	1	0.200345	0	1
AD	ASTHMA	4	11050120	12209028	3896	334	0.372369	-0.52236	1	0.138659	0	1	0.354154	0	1
AD	ASTHMA	4	14967148	15910801	2553	278	0.278228	-0.307	1	0.0774108	0	1	0.307568	0	1
AD	ASTHMA	4	17290237	18753263	4318	294	0.726391	0.11488	1	0.527644	0.01765	1	0.023172	1	1
AD	ASTHMA	4	21416381	22835185	4503	319	0.216987	-0.54477	1	0.0470833	0	1	0.509424	0	1
AD	ASTHMA	4	24764725	25832018	3051	323	0.178456	-0.46993	0.99687	0.0318465	0	1	0.535845	0	0
AD	ASTHMA	4	32746821	33640822	2053	164	0.386071	-0.21396	1	0.149051	0	1	0.184698	0	1
AD	ASTHMA	4	35993839	36671801	2207	196	-0.226579	-0.89642	0.31959	0.0513381	0	0.81278	0.39028	0	0
AD	ASTHMA	4	37880861	38984838	3632	332	0.235836	0.00688	0.47735	0.0556185	0.00072	0.22786	0.0446073	1	0
AD	ASTHMA	4	38984839	39820061	2068	234	-0.0530577	-0.50017	0.3921	0.00281512	0	0.28326	0.801541	0	0
AD	ASTHMA	4	39820062	40590541	2144	300	0.254112	-0.10898	0.66412	0.0645731	0	0.44233	0.172387	0	0
AD	ASTHMA	4	54659779	55681701	2385	304	-0.363893	-1	0.16387	0.132418	0	1	0.170199	0	1
AD	ASTHMA	4	57103101	58011085	2812	271	0.185719	-0.52493	1	0.0344914	0	1	0.558063	0	1
AD	ASTHMA	4	79880102	81206182	3111	267	0.545938	-0.20597	1	0.298048	0	1	0.128825	0	1
AD	ASTHMA	4	88502718	89244554	2223	228	0.341557	-0.3815	1	0.116661	0	1	0.29246	0	1
AD	ASTHMA	4	108131207	109122458	2232	240	-0.65926	-1	-0.04228	0.434624	0.00888	1	0.0412202	0	1
AD	ASTHMA	4	113916003	115306149	3444	316	-0.43185	-1	0.15168	0.186494	0	1	0.142609	0	1
AD	ASTHMA	4	115306150	116204703	2635	193	0.622412	-0.10505	1	0.387397	0	1	0.0907912	0	1
AD	ASTHMA	4	122655435	123768693	2595	242	-0.198501	-0.54901	0.1174	0.0394025	0	0.30162	0.203108	0	0
AD	ASTHMA	4	125486536	126476842	2968	264	0.282486	-0.30204	1	0.0797986	0	1	0.302704	0	1
AD	ASTHMA	4	144401043	146174871	3550	275	-0.101292	-0.93713	0.63518	0.0102601	0	1	0.744652	0	0
AD	ASTHMA	4	148462209	149998528	3498	328	-0.504072	-1	0.26258	0.254089	0	1	0.173629	0	1
AD	ASTHMA	4	163937104	164781847	2209	239	0.629936	-0.13624	1	0.396819	0	1	0.10754	0	1
AD	ASTHMA	4	174470207	175295842	2113	293	-0.58459	-1	-0.10347	0.341746	0.01415	1	0.0174358	0	1
AD	ASTHMA	4	177129679	178314527	3719	309	0.246926	-0.52799	1	0.0609726	0	1	0.46174	0	1
AD	ASTHMA	4	179932392	180540877	2304	210	-0.254981	-1	0.74419	0.0650153	0	1	0.519418	0	1
AD	ASTHMA	4	183603893	184338584	2064	288	-0.158801	-0.6951	0.3318	0.0252177	0	0.49141	0.489343	0	0
AD	ASTHMA	4	185483263	186232882	2323	279	-0.70966	-1	-0.27255	0.503617	0.07428	1	0.00285515	0	1
AD	ASTHMA	4	187985394	189153279	3843	356	0.199721	-0.45896	1	0.0398885	0	1	0.498309	0	1
AD	ASTHMA	4	189153280	189899573	3689	311	0.343585	-0.76961	1	0.118051	0	1	0.445101	0	1
AD	ASTHMA	4	189899574	191043880	2602	269	-0.1658	-1	0.60053	0.0274898	0	1	0.608455	0	1
AD	ASTHMA	5	598321	1206609	1492	225	-0.285002	-0.92506	0.18751	0.0812261	0	0.86754	0.22112	0	0
AD	ASTHMA	5	2106886	2960068	3311	338	0.460728	-0.10809	1	0.21227	0	1	0.112039	0	1
AD	ASTHMA	5	3677596	4636542	2375	283	-0.55463	-1	-0.0116	0.307614	0.00417	1	0.0460395	0	1
AD	ASTHMA	5	4636543	5828694	3557	348	0.595076	-0.00465	1	0.354116	0	1	0.0498769	0	1
AD	ASTHMA	5	5828695	6936733	3953	353	0.575633	-0.06376	1	0.331354	0	1	0.0791229	0	1
AD	ASTHMA	5	13608148	14910295	3327	331	0.139101	-0.19594	0.48284	0.0193491	0	0.23502	0.397377	0	0
AD	ASTHMA	5	16592320	17803477	3205	361	-0.159307	-1	1	0.0253787	0	1	0.713876	0	1
AD	ASTHMA	5	22149043	23246745	2741	225	0.894543	0.20137	1	0.800208	0.04524	1	0.0169531	1	1
AD	ASTHMA	5	31679465	32727914	2877	341	-0.363602	-1	0.3839	0.132206	0	1	0.305789	0	1
AD	ASTHMA	5	33971057	35157146	3096	268	-0.318673	-0.86659	0.10863	0.101552	0	0.75419	0.143379	0	0
AD	ASTHMA	5	55221399	55968966	2273	325	0.622489	-0.15006	1	0.387493	0	1	0.10593	0	1
AD	ASTHMA	5	57895013	58721458	2572	286	0.140511	-0.53744	0.95569	0.0197434	0	1	0.635879	0	0
AD	ASTHMA	5	58721459	59868567	2183	240	-0.0411208	-0.70089	0.60541	0.00169092	0	0.65261	0.880696	0	0
AD	ASTHMA	5	64438519	65606870	2446	238	0.502881	0.02064	1	0.252889	0.00449	1	0.0434207	1	1
AD	ASTHMA	5	67096192	68006993	2346	308	-0.0848915	-1	0.73824	0.00720657	0	1	0.794501	0	1
AD	ASTHMA	5	74245355	75239302	2482	200	0.538414	-0.20229	1	0.289889	0	1	0.13969	0	1
AD	ASTHMA	5	75239303	75959515	2033	266	-0.134777	-0.74643	0.39936	0.0181647	0	0.57692	0.584552	0	0
AD	ASTHMA	5	87943483	89584466	2522	336	-0.298613	-1	0.25374	0.08917	0	1	0.264872	0	1
AD	ASTHMA	5	102903986	103788460	2197	291	0.0754949	-0.37232	0.5399	0.00569948	0	0.31667	0.724714	0	0
AD	ASTHMA	5	109606906	110819517	2863	252	-0.0894385	-0.59093	0.31622	0.00799925	0	0.38513	0.622072	0	0
AD	ASTHMA	5	117348498	118605251	3959	307	-0.790959	-1	-0.09676	0.625617	0.01968	1	0.0332575	0	1
AD	ASTHMA	5	120960738	122005291	2250	262	-0.0539748	-0.66756	0.52705	0.00291327	0	0.55852	0.82962	0	0
AD	ASTHMA	5	124109486	125131720	3198	330	0.235011	-0.48403	1	0.0552303	0	1	0.457891	0	1
AD	ASTHMA	5	125131721	126054697	3008	250	0.0827838	-0.97571	1	0.00685316	0	1	0.831484	0	1
AD	ASTHMA	5	126992837	128067414	2555	250	0.176506	-0.77292	1	0.0311544	0	1	0.6447	0	1
AD	ASTHMA	5	128734906	130573817	3903	263	0.481707	-0.00388	1	0.232042	0	1	0.0489587	0	1
AD	ASTHMA	5	135344944	136949853	3912	331	-0.437125	-1	0.01858	0.191078	0	1	0.0615444	0	1
AD	ASTHMA	5	136949854	139408116	3925	345	0.259038	-0.13761	0.74585	0.0671009	0	0.5575	0.195672	0	0
AD	ASTHMA	5	141253831	142532956	3416	340	-0.225834	-0.75012	0.2076	0.0510011	0	0.5652	0.283205	0	0
AD	ASTHMA	5	147180172	148662214	3859	324	0.227043	-0.35537	0.99017	0.0515483	0	1	0.400678	0	0
AD	ASTHMA	5	153734495	154599750	2272	291	-0.295497	-1	0.40793	0.0873185	0	1	0.359547	0	1
AD	ASTHMA	5	154599751	155459556	2600	247	0.62008	-0.10589	1	0.384499	0	1	0.0981965	0	1
AD	ASTHMA	5	156345452	157191081	2684	238	-0.726872	-1	-0.00567	0.528343	0.00826	1	0.0549407	0	1
AD	ASTHMA	5	158484776	159663733	3076	307	0.41905	-0.18837	1	0.175603	0	1	0.154076	0	1
AD	ASTHMA	5	159663734	160519049	2545	321	-0.0588916	-0.60482	0.48015	0.00346822	0	0.43699	0.803719	0	0
AD	ASTHMA	5	161478178	162386027	2038	234	-0.270289	-0.96373	0.22831	0.0730563	0	0.93064	0.288871	0	0
AD	ASTHMA	5	166863414	168342743	3521	381	-0.150003	-1	0.53886	0.0225008	0	1	0.617814	0	1
AD	ASTHMA	5	169506967	170898340	3479	361	0.26275	-0.37307	1	0.0690374	0	1	0.38266	0	1
AD	ASTHMA	5	172285683	173606995	3691	355	0.0499358	-0.48514	0.63007	0.00249358	0	0.47153	0.836719	0	0
AD	ASTHMA	5	179794711	180902886	2690	294	-0.0321867	-0.77834	0.7117	0.00103598	0	0.85216	0.913165	0	0
AD	ASTHMA	6	63979	1380679	3588	370	-0.0692426	-0.76188	0.57426	0.00479454	0	0.79516	0.791099	0	0
AD	ASTHMA	6	9020711	10416550	3809	321	-1	-1	-0.31852	1	0.10224	1	0.00174429	0	1
AD	ASTHMA	6	16566883	17391994	2093	293	0.582044	0.1889	1	0.338776	0.03656	1	0.00508955	1	1
AD	ASTHMA	6	18208677	18775022	2129	176	-0.231107	-1	0.46923	0.0534104	0	1	0.455589	0	1
AD	ASTHMA	6	20418021	21295864	2538	257	-0.200972	-0.87319	0.34708	0.0403898	0	0.79682	0.440893	0	0
AD	ASTHMA	6	23192338	23939306	2565	289	-0.472734	-1	0.21818	0.223478	0	1	0.154634	0	1
AD	ASTHMA	6	24950380	25684629	2922	241	-0.0537181	-0.88258	0.69002	0.00288563	0	0.98578	0.859584	0	0
AD	ASTHMA	6	30715007	31106493	2751	134	-0.143913	-0.70632	0.3036	0.0207111	0	0.52609	0.477115	0	0
AD	ASTHMA	6	31250557	31320268	1191	37	-0.457968	-1	-0.05326	0.209735	0.00642	1	0.0338423	0	1
AD	ASTHMA	6	31320269	31427209	1598	48	-0.707272	-1	-0.37182	0.500233	0.13825	1	0.000306447	0	1
AD	ASTHMA	6	31427210	32208901	2879	204	-0.337795	-0.54997	-0.1442	0.114106	0.02079	0.30246	0.00105537	0	0
AD	ASTHMA	6	32208902	32454577	2654	59	-0.787011	-1	-0.58748	0.619386	0.34513	1	8.15e-10	0	1
AD	ASTHMA	6	32454578	32539567	50	26	-0.248793	-0.3683	-0.12801	0.0618977	0.01639	0.13565	6.92e-05	0	0
AD	ASTHMA	6	32539568	32586784	408	41	-0.277435	-0.44983	-0.1059	0.0769704	0.01121	0.20234	0.00163948	0	0
AD	ASTHMA	6	32586785	32629239	447	89	-0.210258	-0.35985	-0.05696	0.0442086	0.00334	0.12949	0.0075076	0	0
AD	ASTHMA	6	32629240	32682213	739	32	-0.624756	-0.81265	-0.43362	0.39032	0.18803	0.6604	4.06e-08	0	0
AD	ASTHMA	6	32682214	32897998	2067	88	-0.532679	-0.89576	-0.26804	0.283747	0.07185	0.80238	0.000344854	0	0
AD	ASTHMA	6	32897999	33194975	2255	137	-0.384219	-0.92692	-0.0496	0.147624	0.00386	0.85918	0.0280995	0	0
AD	ASTHMA	6	33194976	33864262	2593	229	-0.306767	-0.63325	-0.02061	0.0941059	0.00176	0.40101	0.0427465	0	0
AD	ASTHMA	6	37570052	38688720	3287	309	0.988493	0.39901	1	0.977118	0.15921	1	0.00154753	1	1
AD	ASTHMA	6	38688721	39785907	3673	320	-0.077723	-0.77809	0.56714	0.00604086	0	0.73294	0.779734	0	0
AD	ASTHMA	6	39785908	40778401	3292	303	0.0439201	-0.46453	0.56546	0.00192897	0	0.41288	0.844376	0	0
AD	ASTHMA	6	40778402	42103738	3652	358	-0.323363	-0.80379	0.06927	0.104564	0	0.64607	0.106965	0	0
AD	ASTHMA	6	45408422	46430701	2383	305	-0.171007	-1	0.65842	0.0292434	0	1	0.618858	0	1
AD	ASTHMA	6	51826424	52598879	2340	284	0.286436	-0.38942	1	0.0820457	0	1	0.371811	0	1
AD	ASTHMA	6	52598880	53425492	2243	245	-0.661833	-1	0.05991	0.438023	0	1	0.0750933	0	1
AD	ASTHMA	6	54452768	55469137	3689	212	0.108718	-1	1	0.0118196	0	1	0.79186	0	1
AD	ASTHMA	6	56200986	57316157	1931	234	-0.420313	-1	0.24342	0.176663	0	1	0.193921	0	1
AD	ASTHMA	6	67559695	68547494	3813	220	-0.171058	-1	0.97687	0.0292608	0	1	0.684892	0	1
AD	ASTHMA	6	70363349	71610787	3550	299	-0.12116	-0.54161	0.27628	0.0146798	0	0.29785	0.53309	0	0
AD	ASTHMA	6	73170169	74401506	3126	280	0.640872	-0.02163	1	0.410717	0	1	0.0603941	0	1
AD	ASTHMA	6	85837204	86818669	2524	199	-0.316746	-1	0.37554	0.100328	0	1	0.335564	0	1
AD	ASTHMA	6	89974268	91097024	2383	301	-0.0985719	-0.44975	0.23491	0.00971641	0	0.20783	0.545188	0	0
AD	ASTHMA	6	104951345	106053915	2256	274	-0.349461	-1	0.40744	0.122123	0	1	0.309414	0	1
AD	ASTHMA	6	106053916	107309327	3741	349	-0.448609	-1	-0.04509	0.20125	0.00449	1	0.0284821	0	1
AD	ASTHMA	6	107309328	109043244	3770	320	-0.016059	-0.60675	0.58363	0.00025789	0	0.54372	0.948894	0	0
AD	ASTHMA	6	109043245	110647842	3932	273	-0.274357	-1	0.19444	0.0752719	0	1	0.227154	0	1
AD	ASTHMA	6	116132148	117674076	3929	277	0.299595	-0.19693	0.92031	0.0897573	0	0.84824	0.20624	0	0
AD	ASTHMA	6	137553213	138825721	3700	338	0.355324	0.02063	0.75806	0.126255	0.0023	0.57466	0.0434273	1	0
AD	ASTHMA	6	138825722	139716713	2305	253	-0.0218302	-0.77079	0.67391	0.000476557	0	0.81325	0.940777	0	0
AD	ASTHMA	6	141449454	143083347	3727	306	-0.0854555	-0.79883	0.56221	0.00730265	0	0.74633	0.760369	0	0
AD	ASTHMA	6	145778283	147015882	2365	205	-0.104364	-0.89519	0.58244	0.0108918	0	0.94803	0.724653	0	0
AD	ASTHMA	6	152376500	153082361	2144	263	-0.117705	-0.98398	0.6016	0.0138544	0	1	0.70269	0	0
AD	ASTHMA	6	153082362	153791461	2042	213	-0.464092	-1	0.10547	0.215381	0	1	0.108046	0	1
AD	ASTHMA	6	159604053	160583918	2849	291	-0.238574	-1	0.40614	0.0569176	0	1	0.419611	0	1
AD	ASTHMA	6	161371015	162254229	2731	317	0.136338	-0.47671	0.84108	0.0185882	0	0.77313	0.614703	0	0
AD	ASTHMA	6	165835954	166853325	3259	325	-0.11849	-1	0.8725	0.0140398	0	1	0.76241	0	1
AD	ASTHMA	6	166853326	167714865	2896	295	0.195493	-0.3605	0.89874	0.0382175	0	0.83766	0.45567	0	0
AD	ASTHMA	7	15064	617319	1089	197	0.00719632	-1	1	5.18e-05	0	1	0.985133	0	1
AD	ASTHMA	7	4139432	4938442	2920	335	0.338561	-0.07096	0.90254	0.114623	0	0.81677	0.0962575	0	0
AD	ASTHMA	7	7167611	7926500	2852	279	-0.000363509	-0.90008	0.88937	1.32e-07	0	1	0.999131	0	0
AD	ASTHMA	7	8718352	9225106	1952	256	0.17412	-0.31171	0.77615	0.0303176	0	0.62031	0.459552	0	0
AD	ASTHMA	7	20122180	21390644	3791	353	0.0269586	-0.2906	0.3562	0.000726765	0	0.14446	0.862573	0	0
AD	ASTHMA	7	24894120	25671575	2381	308	0.365454	-0.18279	1	0.133557	0	1	0.168928	0	1
AD	ASTHMA	7	25671576	27351286	4436	352	-0.414573	-1	0.07862	0.171871	0	1	0.0987549	0	1
AD	ASTHMA	7	27351287	28890886	4355	371	-0.258433	-0.70622	0.09468	0.0667876	0	0.49874	0.148317	0	0
AD	ASTHMA	7	28890887	30175113	3855	346	-0.413329	-1	0.15647	0.170841	0	1	0.147729	0	1
AD	ASTHMA	7	31730555	32460228	2362	253	-0.58457	-1	-0.03006	0.341722	0.00639	1	0.0445336	0	1
AD	ASTHMA	7	36507691	37981936	4318	353	0.100088	-0.4013	0.61611	0.0100175	0	0.41625	0.662897	0	0
AD	ASTHMA	7	42494807	43448815	2805	275	-0.450603	-1	0.27994	0.203043	0	1	0.192828	0	1
AD	ASTHMA	7	49632427	50894508	3577	294	-0.664378	-1	-0.22053	0.441398	0.04869	1	0.00501197	0	1
AD	ASTHMA	7	73128831	75243899	2049	295	-0.60957	-1	0.13326	0.371576	0	1	0.104854	0	1
AD	ASTHMA	7	75243900	76451928	2876	271	-0.227315	-1	0.85493	0.0516722	0	1	0.583526	0	1
AD	ASTHMA	7	77663965	78685009	3541	319	-0.20014	-1	0.56527	0.040056	0	1	0.541995	0	1
AD	ASTHMA	7	78685010	80055721	3234	277	0.318858	-0.27876	1	0.10167	0	1	0.256876	0	1
AD	ASTHMA	7	80055722	81533566	3679	340	0.487175	0.0462	1	0.237339	0.00507	1	0.0329079	1	1
AD	ASTHMA	7	92530166	93691725	2502	284	0.055939	-0.6965	0.88116	0.00312917	0	1	0.856568	0	0
AD	ASTHMA	7	97420208	98173564	1885	209	-0.340704	-1	0.47332	0.116079	0	1	0.354844	0	1
AD	ASTHMA	7	106399740	107658603	2671	302	0.110804	-0.43629	0.72058	0.0122775	0	0.55301	0.662349	0	0
AD	ASTHMA	7	110479480	111795299	2460	298	0.997869	0.31707	1	0.995743	0.10203	1	0.00667907	1	1
AD	ASTHMA	7	115321302	116835336	3119	318	0.579945	-0.05922	1	0.336337	0	1	0.0747423	0	1
AD	ASTHMA	7	121042051	121946052	2168	224	0.509852	-0.11979	1	0.259949	0	1	0.11167	0	1
AD	ASTHMA	7	128779174	130418704	3891	348	0.142183	-0.48104	0.9355	0.020216	0	0.97534	0.611225	0	0
AD	ASTHMA	7	130418705	131856481	3493	368	0.164087	-0.18487	0.54953	0.0269246	0	0.30323	0.351935	0	0
AD	ASTHMA	7	131856482	133807216	4422	348	-0.22573	-1	0.60704	0.0509541	0	1	0.530812	0	1
AD	ASTHMA	7	136113468	137657459	3740	335	-0.516748	-1	0.01827	0.267028	0	1	0.0601678	0	1
AD	ASTHMA	7	138755108	140217630	3494	354	-0.453336	-1	0.06257	0.205514	0	1	0.0848418	0	1
AD	ASTHMA	7	147352172	148622913	3873	342	-0.212433	-1	0.60289	0.0451278	0	1	0.539756	0	1
AD	ASTHMA	7	148622914	149842999	2948	302	0.0502338	-0.51907	0.64286	0.00252344	0	0.51769	0.841826	0	0
AD	ASTHMA	7	149843000	150897818	2930	304	-0.106059	-0.49593	0.25056	0.0112485	0	0.24955	0.558024	0	0
AD	ASTHMA	7	153241229	154407487	2812	334	-0.360966	-1	0.188	0.130297	0	1	0.173663	0	1
AD	ASTHMA	7	157199332	158031247	2972	340	0.021547	-0.54301	0.60448	0.000464271	0	0.47734	0.930188	0	0
AD	ASTHMA	8	11740	660414	1911	251	-0.402224	-1	0.34057	0.161784	0	1	0.247196	0	1
AD	ASTHMA	8	1161825	1628039	2029	280	0.534002	0.11056	1	0.285158	0.01324	1	0.0170515	1	1
AD	ASTHMA	8	1628040	2070902	1782	329	0.0863187	-0.41131	0.62303	0.00745092	0	0.42301	0.710929	0	0
AD	ASTHMA	8	2396123	2970491	2613	312	0.272556	-0.79801	1	0.0742868	0	1	0.528028	0	1
AD	ASTHMA	8	3386668	3787248	2901	308	0.809862	0.07727	1	0.655877	0.01455	1	0.0343723	1	1
AD	ASTHMA	8	9167796	9835863	2591	246	-0.262543	-1	0.76392	0.0689288	0	1	0.52533	0	1
AD	ASTHMA	8	12296850	12947935	1570	183	0.2272	-0.59536	1	0.05162	0	1	0.523599	0	1
AD	ASTHMA	8	13948096	14389305	2266	198	0.719035	-0.19791	1	0.517011	0	1	0.107558	0	1
AD	ASTHMA	8	16988031	17492672	2098	278	0.203282	-0.74636	1	0.0413235	0	1	0.596897	0	1
AD	ASTHMA	8	19488889	20135628	2292	300	-0.274596	-1	0.56498	0.0754031	0	1	0.444406	0	1
AD	ASTHMA	8	20812108	21650453	2626	317	0.0376849	-0.40277	0.4873	0.00142015	0	0.27076	0.85682	0	0
AD	ASTHMA	8	22895019	23788494	3067	316	-0.588584	-1	-0.0339	0.346431	0.00649	1	0.0399841	0	1
AD	ASTHMA	8	23788495	24863243	2731	278	0.995747	0.37893	1	0.991513	0.14459	1	0.00272458	1	1
AD	ASTHMA	8	27406512	28344176	2561	293	0.0579146	-0.26973	0.4088	0.0033541	0	0.17562	0.722183	0	0
AD	ASTHMA	8	32454963	33982537	3416	308	-0.618421	-1	0.11959	0.382445	0	1	0.093102	0	1
AD	ASTHMA	8	54119374	55275354	2951	241	-0.033225	-1	1	0.0011039	0	1	0.937441	0	1
AD	ASTHMA	8	58675118	59555977	2583	272	-0.0481112	-0.89653	0.8036	0.00231469	0	1	0.881418	0	0
AD	ASTHMA	8	59555978	60476248	2158	254	0.114604	-0.46333	0.79912	0.0131342	0	0.70371	0.656841	0	0
AD	ASTHMA	8	64215359	66018204	3520	293	-0.428857	-1	0.38186	0.183918	0	1	0.262649	0	1
AD	ASTHMA	8	70004666	70872088	2082	284	-0.545466	-1	-0.0698	0.297533	0.00825	1	0.0261159	0	1
AD	ASTHMA	8	72917490	73838027	2735	278	-0.0779055	-0.97037	0.74337	0.00606927	0	1	0.807394	0	0
AD	ASTHMA	8	82878770	83730337	2573	209	-0.100126	-1	0.71655	0.0100252	0	1	0.764645	0	1
AD	ASTHMA	8	94999067	96175630	3434	283	-0.669179	-1	0.12355	0.4478	0	1	0.0883735	0	1
AD	ASTHMA	8	96175631	96900513	2225	294	-0.507247	-1	0.15704	0.257299	0	1	0.131571	0	1
AD	ASTHMA	8	96900514	98132519	2542	308	-0.037025	-0.51285	0.42054	0.00137085	0	0.30681	0.864043	0	0
AD	ASTHMA	8	98132520	99388944	3154	322	0.338268	-0.15142	0.98963	0.114425	0	0.9818	0.163637	0	0
AD	ASTHMA	8	101448440	102548680	2648	341	-0.252951	-0.93602	0.24183	0.063984	0	0.87937	0.293299	0	0
AD	ASTHMA	8	103716054	104467845	2196	261	-0.267689	-1	0.47708	0.0716573	0	1	0.415873	0	1
AD	ASTHMA	8	107787164	108647463	2707	229	0.202531	-0.37174	0.94786	0.0410188	0	0.92404	0.449869	0	0
AD	ASTHMA	8	116094204	118300068	4137	357	-0.0639415	-0.73805	0.5872	0.00408851	0	0.69074	0.813004	0	0
AD	ASTHMA	8	118300069	119423298	2651	312	0.0134379	-0.46589	0.50165	0.000180578	0	0.32648	0.950051	0	0
AD	ASTHMA	8	119423299	120216587	2261	230	0.456793	-0.10606	1	0.20866	0	1	0.104414	0	1
AD	ASTHMA	8	122622805	124001019	2892	319	-0.177906	-0.70136	0.28488	0.0316505	0	0.50867	0.420884	0	0
AD	ASTHMA	8	125453323	126766827	3496	346	0.277823	-0.11755	0.7814	0.0771858	0	0.61058	0.174412	0	0
AD	ASTHMA	8	129291119	130383563	2972	266	-0.18957	-0.87454	0.37403	0.0359368	0	0.80049	0.461144	0	0
AD	ASTHMA	8	133461552	134509448	3079	336	0.173568	-0.29048	0.71491	0.030126	0	0.5202	0.440417	0	0
AD	ASTHMA	8	134509449	135313673	2973	316	0.584901	0.06617	1	0.34211	0.0092	1	0.0315196	1	1
AD	ASTHMA	8	139404632	140355988	2800	301	-0.517714	-1	-0.09439	0.268028	0.01088	1	0.0204428	0	1
AD	ASTHMA	8	140355989	141527881	3147	345	0.169782	-0.48885	1	0.0288259	0	1	0.566384	0	1
AD	ASTHMA	8	141527882	142611889	2970	325	-0.334606	-0.94513	0.13556	0.111961	0	0.89346	0.145211	0	0
AD	ASTHMA	8	143611462	144934288	3917	323	-0.498121	-1	-0.11282	0.248125	0.01397	1	0.0159335	0	1
AD	ASTHMA	9	653662	1103598	1904	271	-0.14349	-0.98924	0.55547	0.0205893	0	1	0.638539	0	0
AD	ASTHMA	9	2441121	3079045	1928	301	0.169513	-0.49654	1	0.0287346	0	1	0.566928	0	1
AD	ASTHMA	9	3079046	4025355	2613	345	-0.00143583	-0.88315	0.86057	2.06e-06	0	1	0.996447	0	0
AD	ASTHMA	9	4025356	4596614	2048	325	-0.173498	-0.67566	0.26544	0.0301016	0	0.46142	0.422036	0	0
AD	ASTHMA	9	4596615	5437591	2365	283	0.211929	-0.21939	0.7157	0.0449137	0	0.51621	0.320638	0	0
AD	ASTHMA	9	12664859	13512852	2047	298	-0.271142	-1	0.36001	0.0735181	0	1	0.351788	0	1
AD	ASTHMA	9	14244748	14902924	2051	331	0.280633	-0.42446	1	0.0787548	0	1	0.375759	0	1
AD	ASTHMA	9	16658378	17392382	2681	204	0.1944	-0.55179	1	0.0377912	0	1	0.551931	0	1
AD	ASTHMA	9	21674033	23091193	3650	330	-1	-1	-0.2448	1	0.06457	1	0.0120556	0	1
AD	ASTHMA	9	27366480	28067454	2174	273	0.0632207	-0.72601	0.9509	0.00399686	0	1	0.84219	0	0
AD	ASTHMA	9	37687113	38822977	2811	312	-0.360515	-1	0.20466	0.129971	0	1	0.199869	0	1
AD	ASTHMA	9	70939678	72288878	2908	295	-0.39512	-1	0.24755	0.15612	0	1	0.191674	0	1
AD	ASTHMA	9	73915495	74950318	2392	299	-0.341602	-1	0.58121	0.116692	0	1	0.389356	0	1
AD	ASTHMA	9	76197745	77862308	3721	335	-0.265779	-1	0.61519	0.0706385	0	1	0.482835	0	1
AD	ASTHMA	9	77862309	78630915	2686	295	-0.454931	-1	-0.00027	0.206962	0.00327	1	0.0481121	0	1
AD	ASTHMA	9	78630916	79451035	2494	335	-0.196631	-0.80742	0.32931	0.0386638	0	0.65834	0.425337	0	0
AD	ASTHMA	9	86769887	87815449	3173	295	-0.0407433	-0.84233	0.72348	0.00166001	0	1	0.893925	0	0
AD	ASTHMA	9	89171797	90135154	2878	310	-0.125473	-1	0.858	0.0157434	0	1	0.735399	0	1
AD	ASTHMA	9	90135155	90890979	2290	240	-0.211306	-1	0.57858	0.0446501	0	1	0.527524	0	1
AD	ASTHMA	9	90890980	91643255	2068	218	0.0615798	-0.8888	1	0.00379207	0	1	0.859683	0	1
AD	ASTHMA	9	91643256	92500277	2352	266	0.148875	-0.20206	0.51962	0.0221637	0	0.27048	0.386534	0	0
AD	ASTHMA	9	92500278	93441050	2611	252	0.119977	-0.3384	0.62574	0.0143945	0	0.40632	0.578439	0	0
AD	ASTHMA	9	93441051	94175374	2204	268	0.205267	-0.24781	0.72586	0.0421344	0	0.53072	0.34888	0	0
AD	ASTHMA	9	100310518	101596750	3467	333	0.598724	-0.12456	1	0.35847	0	1	0.104428	0	1
AD	ASTHMA	9	107061020	108203095	3606	313	-0.695009	-1	-0.21216	0.483037	0.04651	1	0.00579626	0	1
AD	ASTHMA	9	110630151	111368107	2277	252	-0.570848	-1	0.06391	0.325867	0	1	0.0806255	0	1
AD	ASTHMA	9	112865521	113646149	2593	298	0.537877	0.01509	1	0.289312	0.00415	1	0.0449165	1	1
AD	ASTHMA	9	114443476	115390112	2647	245	0.187954	-0.26869	0.69068	0.0353268	0	0.47966	0.392717	0	0
AD	ASTHMA	9	116159541	117054909	2521	322	0.0386971	-0.85091	1	0.00149746	0	1	0.909019	0	1
AD	ASTHMA	9	117054910	117989017	2786	291	-0.348107	-0.96002	0.08315	0.121179	0	0.92164	0.111741	0	0
AD	ASTHMA	9	121008530	122677719	3854	349	0.302618	-0.2362	1	0.0915778	0	1	0.24611	0	1
AD	ASTHMA	9	124119884	125137578	2541	310	-0.147641	-0.78083	0.38828	0.0217979	0	0.64227	0.548664	0	0
AD	ASTHMA	9	128785783	129617771	2391	338	-0.136396	-1	0.59126	0.0186037	0	1	0.661812	0	1
AD	ASTHMA	9	129617772	130902727	2538	273	-0.0214356	-0.49861	0.44341	0.000459484	0	0.30098	0.919199	0	0
AD	ASTHMA	9	132193799	132999452	2707	277	-0.247081	-0.95522	0.27367	0.0610492	0	0.95216	0.309881	0	0
AD	ASTHMA	9	132999453	134141936	2625	351	-0.163783	-0.8905	0.39397	0.026825	0	0.85368	0.525595	0	0
AD	ASTHMA	9	134141937	135135887	2335	304	0.0318989	-0.47228	0.53904	0.00101754	0	0.36125	0.888488	0	0
AD	ASTHMA	9	136042491	136770926	2781	310	-0.440154	-1	0.04972	0.193735	0	1	0.0759148	0	1
AD	ASTHMA	9	136770927	137593527	2411	300	-0.20535	-0.60039	0.151	0.0421687	0	0.36208	0.244485	0	0
AD	ASTHMA	9	137593528	138202112	2433	348	0.0815923	-0.60342	0.87391	0.00665731	0	0.89524	0.781031	0	0
AD	ASTHMA	9	138202113	138995791	2491	334	0.275753	-0.12124	0.72908	0.0760396	0	0.53155	0.154725	0	0
AD	ASTHMA	9	140097760	141146682	1880	312	-0.336201	-0.79427	0.05055	0.113031	0	0.63086	0.0920663	0	0
AD	ASTHMA	10	3225337	3880322	2111	267	0.27338	-0.75891	1	0.0747368	0	1	0.511751	0	1
AD	ASTHMA	10	3880323	4813182	2897	333	0.709289	0.26572	1	0.503091	0.0706	1	0.00275767	1	1
AD	ASTHMA	10	4813183	5396242	2458	223	-0.214134	-1	0.80862	0.0458533	0	1	0.600881	0	1
AD	ASTHMA	10	5396243	6234718	3127	341	0.0694997	-0.21528	0.37016	0.00483021	0	0.14	0.630963	0	0
AD	ASTHMA	10	6234719	6897037	2067	310	-0.147169	-0.69064	0.28144	0.0216586	0	0.48811	0.461012	0	0
AD	ASTHMA	10	7659873	8771920	3831	351	-0.0792115	-0.49182	0.28009	0.00627446	0	0.25419	0.634991	0	0
AD	ASTHMA	10	11856925	12581571	2256	294	0.526276	-0.03759	1	0.276967	0	1	0.0716766	0	1
AD	ASTHMA	10	12581572	13208061	2130	296	0.25502	-0.17345	0.81053	0.0650352	0	0.65823	0.217619	0	0
AD	ASTHMA	10	14008136	14820755	2905	301	-0.574741	-1	0.13333	0.330327	0	1	0.103737	0	1
AD	ASTHMA	10	23365686	24489447	2659	263	0.0633052	-0.84686	1	0.00400755	0	1	0.855956	0	1
AD	ASTHMA	10	29393750	30000223	2157	275	-0.0594892	-0.76986	0.59248	0.00353897	0	0.73393	0.831536	0	0
AD	ASTHMA	10	30000224	30919469	2782	294	0.255392	-0.46714	1	0.0652251	0	1	0.420647	0	1
AD	ASTHMA	10	43769843	44893846	4243	288	-0.0249197	-0.86944	0.80768	0.00062099	0	1	0.937287	0	0
AD	ASTHMA	10	46327145	49197320	1333	222	-0.0467559	-0.65226	0.48619	0.00218612	0	0.50911	0.840398	0	0
AD	ASTHMA	10	49197321	50145673	2152	255	-0.015329	-0.60578	0.55614	0.000234978	0	0.46921	0.950816	0	0
AD	ASTHMA	10	53129610	53919161	2619	287	-0.573413	-1	0.21423	0.328803	0	1	0.134943	0	1
AD	ASTHMA	10	55104429	55867694	2752	225	0.255011	-0.70457	1	0.0650308	0	1	0.511172	0	1
AD	ASTHMA	10	59822947	61470383	3834	338	0.190592	-0.23759	0.679	0.0363252	0	0.46621	0.372047	0	0
AD	ASTHMA	10	64069688	65400431	3778	301	0.275658	-0.43756	1	0.0759875	0	1	0.400876	0	1
AD	ASTHMA	10	71050505	71672997	2310	334	-0.0717386	-0.86345	0.61973	0.00514642	0	0.89179	0.809453	0	0
AD	ASTHMA	10	71672998	72659223	3361	334	-0.208664	-1	0.42644	0.0435408	0	1	0.469878	0	1
AD	ASTHMA	10	72659224	73514214	3074	359	-0.428544	-1	0.08377	0.18365	0	1	0.0973462	0	1
AD	ASTHMA	10	75694024	77144961	2683	233	0.383305	-0.22177	1	0.146923	0	1	0.199612	0	1
AD	ASTHMA	10	81763231	82378048	2082	187	-0.25951	-1	0.56276	0.0673456	0	1	0.478722	0	1
AD	ASTHMA	10	83596351	84679429	2833	285	-0.626175	-1	0.02423	0.392096	0	1	0.0592224	0	1
AD	ASTHMA	10	85463485	86459980	3172	293	0.368032	-0.44803	1	0.135447	0	1	0.326308	0	1
AD	ASTHMA	10	89971629	91021321	3134	321	0.184132	-0.44717	0.94644	0.0339044	0	0.96417	0.512779	0	0
AD	ASTHMA	10	91960436	92911506	2736	263	-0.162048	-1	0.57842	0.0262595	0	1	0.61715	0	1
AD	ASTHMA	10	98005995	99367800	3474	343	0.00687508	-0.55766	0.58422	4.73e-05	0	0.5103	0.977485	0	0
AD	ASTHMA	10	102509299	104206837	3058	324	0.265146	-0.28155	1	0.0703026	0	1	0.317678	0	1
AD	ASTHMA	10	115588904	116845213	2975	317	0.498678	0.00583	1	0.24868	0.00364	1	0.0544827	1	1
AD	ASTHMA	10	118416050	119528730	2492	319	-0.152947	-0.69763	0.33427	0.0233928	0	0.50359	0.509698	0	0
AD	ASTHMA	10	123856185	124894142	3132	330	-0.23906	-1	0.58227	0.0571496	0	1	0.505124	0	1
AD	ASTHMA	10	127997709	129134738	2842	342	-0.345948	-0.81034	0.04264	0.11968	0	0.65664	0.0780438	0	0
AD	ASTHMA	10	132576794	133111170	2562	330	0.128679	-0.59348	1	0.0165583	0	1	0.676034	0	1
AD	ASTHMA	11	87150	1061399	2591	313	-0.458911	-1	0.13962	0.210599	0	1	0.122765	0	1
AD	ASTHMA	11	1061400	1857845	2762	279	0.347467	-0.00509	0.82197	0.120733	0	0.67563	0.0534178	0	0
AD	ASTHMA	11	1857846	2477449	1980	271	-0.483014	-1	-0.08208	0.233303	0.00865	1	0.0214905	0	1
AD	ASTHMA	11	2477450	3362508	2285	346	-0.0744464	-0.67255	0.49174	0.00554227	0	0.57339	0.755817	0	0
AD	ASTHMA	11	6180841	7191230	2782	330	0.692701	0.07448	1	0.479835	0.01301	1	0.0293367	1	1
AD	ASTHMA	11	11081300	11632650	2199	319	-0.303236	-1	0.41715	0.0919519	0	1	0.360134	0	1
AD	ASTHMA	11	11632651	12470449	2742	335	0.189089	-0.49643	1	0.0357547	0	1	0.542445	0	1
AD	ASTHMA	11	15126768	16383386	2699	290	-0.170412	-0.65606	0.27474	0.0290404	0	0.4353	0.422996	0	0
AD	ASTHMA	11	20686337	21442722	2183	308	-0.193528	-1	0.4447	0.0374529	0	1	0.507354	0	1
AD	ASTHMA	11	23164545	24091272	3343	238	0.583427	-0.13119	1	0.340386	0	1	0.109173	0	1
AD	ASTHMA	11	24892440	25662918	2900	173	0.738123	0.09362	1	0.544826	0.01718	1	0.0282481	1	1
AD	ASTHMA	11	25662919	26356980	3103	210	0.64744	-0.21461	1	0.419179	0	1	0.119951	0	1
AD	ASTHMA	11	30570130	32065771	2340	270	0.478384	-0.27094	1	0.228851	0	1	0.185772	0	1
AD	ASTHMA	11	35500368	36331189	2124	292	0.272598	-0.39536	1	0.0743095	0	1	0.3781	0	1
AD	ASTHMA	11	36331190	37119024	2242	243	0.341717	-0.1229	1	0.116771	0	1	0.143334	0	1
AD	ASTHMA	11	39329141	40362940	2500	282	-0.0857592	-1	0.85345	0.00735464	0	1	0.813259	0	1
AD	ASTHMA	11	45019560	46316005	3079	311	-0.362011	-1	0.14124	0.131052	0	1	0.152059	0	1
AD	ASTHMA	11	46316006	48066366	2945	218	0.0983554	-0.53254	0.8062	0.00967379	0	0.75179	0.715901	0	0
AD	ASTHMA	11	51098367	51581595	1719	51	0.675083	-0.1716	1	0.455738	0	1	0.10783	0	1
AD	ASTHMA	11	55947453	56623494	2114	97	0.932373	0.11802	1	0.869319	0.02756	1	0.038285	1	1
AD	ASTHMA	11	56623495	57675986	2284	254	0.129989	-0.24595	0.53405	0.0168971	0	0.28718	0.48183	0	0
AD	ASTHMA	11	57675987	58452708	2238	163	0.0483831	-0.79449	0.94669	0.00234093	0	1	0.884318	0	0
AD	ASTHMA	11	58452709	59256232	2189	186	-0.435287	-1	0.36588	0.189475	0	1	0.244773	0	1
AD	ASTHMA	11	60515106	61717117	2387	304	0.036332	-0.39168	0.48059	0.00132001	0	0.27101	0.851944	0	0
AD	ASTHMA	11	61717118	62800368	2413	301	0.48217	-0.1219	1	0.232488	0	1	0.108649	0	1
AD	ASTHMA	11	62800369	64594822	3481	319	-0.192797	-0.84615	0.33734	0.0371706	0	0.723	0.440844	0	0
AD	ASTHMA	11	66782662	68000949	2459	264	0.249061	-0.39146	1	0.0620315	0	1	0.404411	0	1
AD	ASTHMA	11	68000950	68887344	2143	233	-0.362172	-1	0.47204	0.131168	0	1	0.333601	0	1
AD	ASTHMA	11	68887345	69713996	2299	296	0.332964	-0.04442	0.76278	0.110865	0	0.58183	0.0763229	0	0
AD	ASTHMA	11	78912253	79802286	2575	324	0.299218	-0.3262	1	0.0895314	0	1	0.304947	0	1
AD	ASTHMA	11	79802287	80726012	3001	304	-0.236521	-1	0.42045	0.0559424	0	1	0.428511	0	1
AD	ASTHMA	11	85869060	86629333	2396	264	-0.621103	-1	-0.189	0.385768	0.036	1	0.00621985	0	1
AD	ASTHMA	11	95327211	96150134	2350	294	-0.0325668	-0.5483	0.44276	0.00106059	0	0.36018	0.885405	0	0
AD	ASTHMA	11	101881253	102671665	2282	305	-0.018066	-0.68932	0.65345	0.000326381	0	0.67424	0.946895	0	0
AD	ASTHMA	11	105932283	107054024	2828	282	-0.0352875	-1	1	0.0012452	0	1	0.934656	0	1
AD	ASTHMA	11	109891838	111117780	3141	290	0.0838348	-0.92836	1	0.00702827	0	1	0.827469	0	1
AD	ASTHMA	11	112755447	113889019	2912	299	0.418671	-0.21479	1	0.175285	0	1	0.179399	0	1
AD	ASTHMA	11	117295642	118901213	4345	376	-0.767254	-1	-0.21881	0.588679	0.04834	1	0.00700841	0	1
AD	ASTHMA	11	118901214	120064528	2882	328	-0.0725111	-0.57474	0.40132	0.00525785	0	0.35965	0.737883	0	0
AD	ASTHMA	11	121208187	122589224	2951	326	-0.117895	-0.6211	0.33619	0.0138993	0	0.39565	0.587875	0	0
AD	ASTHMA	11	122589225	123398882	2401	318	0.222156	-0.34124	0.94777	0.0493533	0	0.90955	0.408552	0	0
AD	ASTHMA	11	126304241	127306871	3078	335	0.202959	-0.62966	1	0.0411923	0	1	0.557918	0	1
AD	ASTHMA	11	127306872	128262550	2671	297	0.031295	-0.61329	0.6786	0.000979376	0	0.67211	0.905114	0	0
AD	ASTHMA	11	128262551	129451784	3028	355	0.0436755	-0.64391	0.79351	0.00190755	0	0.84228	0.876606	0	0
AD	ASTHMA	11	129451785	130500783	3032	319	-0.827691	-1	-0.12831	0.685072	0.02366	1	0.0250242	0	1
AD	ASTHMA	11	130500784	131424361	2742	340	-0.394305	-1	0.14112	0.155477	0	1	0.144183	0	1
AD	ASTHMA	11	133521643	134351064	2271	339	0.265226	-0.40602	1	0.0703447	0	1	0.377186	0	1
AD	ASTHMA	12	1942427	3069506	2715	338	-0.68825	-1	0.12805	0.473688	0	1	0.0905806	0	1
AD	ASTHMA	12	3069507	3871114	2531	331	0.0439894	-1	1	0.00193506	0	1	0.917385	0	1
AD	ASTHMA	12	4967644	6023700	2812	355	-0.106724	-1	0.96419	0.0113899	0	1	0.783273	0	1
AD	ASTHMA	12	6023701	6948954	2247	313	0.106008	-0.34126	0.58374	0.0112378	0	0.35284	0.613483	0	0
AD	ASTHMA	12	6948955	8123317	2776	307	0.256454	-0.15541	0.75182	0.0657687	0	0.56549	0.213357	0	0
AD	ASTHMA	12	8760629	10176713	3519	326	0.174336	-0.54548	1	0.0303931	0	1	0.581743	0	1
AD	ASTHMA	12	11742150	12721874	2416	309	0.018991	-0.2745	0.311	0.000360656	0	0.11521	0.895409	0	0
AD	ASTHMA	12	12721875	13559527	1975	304	-0.0796365	-0.4586	0.28464	0.00634197	0	0.21861	0.655669	0	0
AD	ASTHMA	12	13559528	14656849	3383	316	-0.0554276	-0.70662	0.54238	0.00307222	0	0.58597	0.829064	0	0
AD	ASTHMA	12	14656850	16136742	3037	326	-0.430779	-1	0.111	0.185571	0	1	0.106017	0	1
AD	ASTHMA	12	20074931	20866285	2348	289	0.332676	-0.05471	0.80362	0.110673	0	0.6458	0.0911445	0	0
AD	ASTHMA	12	25058715	25990813	3145	292	0.368255	-0.23857	1	0.135612	0	1	0.21198	0	1
AD	ASTHMA	12	25990814	26958056	3055	286	-0.945279	-1	-0.50167	0.893552	0.25168	1	0.000121145	0	1
AD	ASTHMA	12	26958057	27797262	2376	214	0.360134	-0.58335	1	0.129696	0	1	0.376938	0	1
AD	ASTHMA	12	29647194	30358377	2693	285	0.439339	-0.34343	1	0.193019	0	1	0.216744	0	1
AD	ASTHMA	12	43980532	44923825	2515	204	-0.486605	-1	0.19188	0.236784	0	1	0.139405	0	1
AD	ASTHMA	12	46037745	47499603	3189	290	-1	-1	-0.37816	1	0.14382	1	0.00220401	0	1
AD	ASTHMA	12	48960266	50344346	2557	265	0.753158	0.12156	1	0.567247	0.0202	1	0.0284048	1	1
AD	ASTHMA	12	50344347	51769419	2589	189	0.104942	-0.58807	0.87631	0.0110129	0	0.91889	0.717198	0	0
AD	ASTHMA	12	51769420	53039987	3628	340	-0.0788502	-0.77683	0.54703	0.00621735	0	0.72367	0.769277	0	0
AD	ASTHMA	12	53039988	54371448	3316	302	0.113629	-0.45492	0.79084	0.0129115	0	0.66401	0.672593	0	0
AD	ASTHMA	12	54371449	55416802	2453	304	-0.174642	-0.97529	0.48555	0.0305	0	1	0.555544	0	0
AD	ASTHMA	12	56987106	58748139	3115	291	-0.0304445	-0.3748	0.2939	0.000926866	0	0.16241	0.844797	0	0
AD	ASTHMA	12	63764112	64403857	1758	145	0.643015	0.037	1	0.413468	0.00853	1	0.0447672	1	1
AD	ASTHMA	12	66114644	67183620	2473	297	-0.0677654	-0.63875	0.49052	0.00459214	0	0.46983	0.779157	0	0
AD	ASTHMA	12	68006683	68839661	2153	268	0.335788	-0.16476	1	0.112754	0	1	0.174468	0	1
AD	ASTHMA	12	71948186	73154515	2497	260	-0.282168	-0.75177	0.11899	0.0796189	0	0.56516	0.158269	0	0
AD	ASTHMA	12	73154516	74080747	2607	192	-0.539266	-1	0.22951	0.290808	0	1	0.144005	0	1
AD	ASTHMA	12	75563969	76524573	2241	276	0.486414	-0.10622	1	0.236598	0	1	0.0962018	0	1
AD	ASTHMA	12	88344765	90567001	3762	303	0.717769	0.25458	1	0.515193	0.06481	1	0.00352682	1	1
AD	ASTHMA	12	95147846	96017782	2960	249	0.476166	-0.09923	1	0.226734	0	1	0.107634	0	1
AD	ASTHMA	12	96828315	97814021	3076	278	-0.234941	-1	0.5349	0.0551975	0	1	0.489149	0	1
AD	ASTHMA	12	100931424	101825061	2455	275	-0.181807	-1	0.50574	0.0330539	0	1	0.551187	0	1
AD	ASTHMA	12	101825062	102966633	3106	286	0.817523	0.1229	1	0.668344	0.02205	1	0.0246526	1	1
AD	ASTHMA	12	106153788	106964977	2149	287	-0.0883916	-0.80578	0.57631	0.00781307	0	0.80144	0.749333	0	0
AD	ASTHMA	12	115439452	116197675	2482	310	0.0738804	-0.4109	0.60612	0.00545831	0	0.40044	0.747674	0	0
AD	ASTHMA	12	116197676	117091843	2441	314	0.433011	-0.14556	1	0.187499	0	1	0.13346	0	1
AD	ASTHMA	12	117091844	118256124	3068	323	0.251259	-0.50541	1	0.0631311	0	1	0.453138	0	1
AD	ASTHMA	12	127545378	128372588	2488	316	0.349414	-0.14792	1	0.12209	0	1	0.153752	0	1
AD	ASTHMA	12	128372589	129170296	2436	328	-0.510321	-1	0.05136	0.260428	0	1	0.0780984	0	1
AD	ASTHMA	12	129170297	129887418	2539	343	-0.0966841	-0.84421	0.54538	0.00934781	0	0.84858	0.721947	0	0
AD	ASTHMA	12	130629841	131404042	2678	328	0.456095	-0.07457	1	0.208022	0	1	0.0882751	0	1
AD	ASTHMA	12	132957946	133841814	2286	229	-0.0801317	-0.99507	0.76384	0.00642109	0	1	0.811081	0	0
AD	ASTHMA	13	20491182	21540733	3023	296	0.332931	-0.24522	1	0.110843	0	1	0.235358	0	1
AD	ASTHMA	13	22795189	23729049	3507	354	0.453351	-0.08237	1	0.205528	0	1	0.0962881	0	1
AD	ASTHMA	13	23729050	24818333	4123	350	0.415006	0.05636	0.87766	0.17223	0.00494	0.77029	0.0275682	1	0
AD	ASTHMA	13	26681710	27392005	2288	232	-0.209973	-1	0.69458	0.0440887	0	1	0.584455	0	1
AD	ASTHMA	13	36579414	37499810	2224	245	0.583065	0.06172	1	0.339965	0.00812	1	0.0334015	1	1
AD	ASTHMA	13	37499811	38290689	2455	210	-0.456925	-1	0.53537	0.20878	0	1	0.290227	0	1
AD	ASTHMA	13	42950158	43931931	2490	299	0.1388	-0.55587	0.93678	0.0192653	0	1	0.63906	0	0
AD	ASTHMA	13	46493237	47433528	2068	234	0.372172	-0.29586	1	0.138512	0	1	0.240548	0	1
AD	ASTHMA	13	54684857	55576912	2440	212	-0.138076	-1	0.82858	0.019065	0	1	0.716574	0	1
AD	ASTHMA	13	56434008	58245843	3286	230	0.424446	-0.35228	1	0.180155	0	1	0.241625	0	1
AD	ASTHMA	13	70427881	71010208	2130	202	-0.673465	-1	-0.02072	0.453555	0.0065	1	0.0478741	0	1
AD	ASTHMA	13	74437636	75882384	3945	337	0.0865142	-0.47367	0.70127	0.0074847	0	0.56393	0.736409	0	0
AD	ASTHMA	13	77460045	78693310	3088	224	-0.402377	-1	0.3077	0.161907	0	1	0.237136	0	1
AD	ASTHMA	13	79489046	80778339	2900	292	0.671884	0.12918	1	0.451428	0.02058	1	0.019663	1	1
AD	ASTHMA	13	90518148	91764204	3603	298	0.284796	-0.4587	1	0.0811089	0	1	0.392415	0	1
AD	ASTHMA	13	94925137	96132647	3981	349	-0.251105	-0.82944	0.21917	0.0630539	0	0.69169	0.281936	0	0
AD	ASTHMA	13	101573737	103050417	4244	368	0.229766	-0.41067	1	0.0527926	0	1	0.436285	0	1
AD	ASTHMA	13	103050418	104378435	4166	337	-0.229134	-1	0.38685	0.0525024	0	1	0.407184	0	1
AD	ASTHMA	13	106313848	107037864	2165	287	0.227644	-0.34793	0.92281	0.0518218	0	0.86409	0.39139	0	0
AD	ASTHMA	13	110995433	111621244	2241	316	-0.0349813	-0.67733	0.58183	0.00122369	0	0.64942	0.892996	0	0
AD	ASTHMA	13	111621245	112319064	2565	306	-0.154674	-0.92222	0.45723	0.023924	0	0.91342	0.577106	0	0
AD	ASTHMA	13	112319065	113573118	3344	357	0.528955	-0.10333	1	0.279793	0	1	0.0918023	0	1
AD	ASTHMA	14	20876081	21982654	2933	380	-0.617409	-1	0.00632	0.381194	0	1	0.0539513	0	1
AD	ASTHMA	14	22760701	23985936	3135	374	0.371783	-0.15292	1	0.138222	0	1	0.160524	0	1
AD	ASTHMA	14	23985937	24906056	2021	287	0.810463	0.07367	1	0.65685	0.01559	1	0.0312077	1	1
AD	ASTHMA	14	24906057	25585041	2171	209	0.0265694	-0.57167	0.63015	0.000705934	0	0.54363	0.917047	0	0
AD	ASTHMA	14	26395691	27720240	2876	293	-0.118887	-0.73546	0.41346	0.0141341	0	0.56999	0.617127	0	0
AD	ASTHMA	14	32382246	33591113	2992	351	-0.183087	-1	0.50268	0.0335209	0	1	0.542906	0	1
AD	ASTHMA	14	33591114	34695195	3117	390	-0.152599	-0.88823	0.42275	0.0232865	0	0.84243	0.550471	0	0
AD	ASTHMA	14	34695196	35379988	1904	199	0.276922	-0.3203	1	0.0766858	0	1	0.316131	0	1
AD	ASTHMA	14	35379989	36422077	2368	213	0.512868	0.03465	1	0.263033	0.00476	1	0.0416197	1	1
AD	ASTHMA	14	51418372	52206122	2456	273	0.0717449	-0.74111	1	0.00514733	0	1	0.827884	0	1
AD	ASTHMA	14	52206123	52760553	2055	236	0.0463466	-0.5531	0.67678	0.00214801	0	0.58509	0.855563	0	0
AD	ASTHMA	14	52760554	54359598	3831	318	-0.553701	-1	-0.01702	0.306585	0.00451	1	0.0452228	0	1
AD	ASTHMA	14	54359599	55292832	2010	266	0.391078	-0.04911	0.94179	0.152942	0	0.88696	0.0752866	0	0
AD	ASTHMA	14	56206431	57460781	3695	338	0.471079	-0.08869	1	0.221916	0	1	0.101432	0	1
AD	ASTHMA	14	60099483	61652816	2981	238	0.873414	0.25865	1	0.762852	0.06807	1	0.00800693	1	1
AD	ASTHMA	14	61652817	62717985	2924	304	-0.0529167	-0.43323	0.31766	0.00280018	0	0.20533	0.773974	0	0
AD	ASTHMA	14	64033238	65229391	2627	224	-0.242776	-0.99217	0.35493	0.05894	0	1	0.384335	0	0
AD	ASTHMA	14	68976913	69794542	2247	284	0.283706	-0.15535	0.86213	0.0804893	0	0.7444	0.193627	0	0
AD	ASTHMA	14	72665320	73373373	2150	266	0.026563	-1	1	0.000705591	0	1	0.947914	0	1
AD	ASTHMA	14	76694202	77425453	2011	297	-0.143393	-0.59454	0.27321	0.0205617	0	0.35463	0.478714	0	0
AD	ASTHMA	14	78374054	79199451	2492	276	-0.401542	-1	0.19506	0.161236	0	1	0.173715	0	1
AD	ASTHMA	14	81001921	82524785	4589	330	-0.868781	-1	-0.17844	0.754781	0.03751	1	0.0172874	0	1
AD	ASTHMA	14	88208596	89482883	3615	280	0.0330157	-0.46428	0.54451	0.00109004	0	0.36745	0.883104	0	0
AD	ASTHMA	14	89482884	90662836	2899	338	0.950751	0.34847	1	0.903928	0.1221	1	0.00363068	1	1
AD	ASTHMA	14	90662837	92101228	3944	337	-0.410432	-0.97712	-0.00497	0.168455	0.0021	0.95476	0.0515127	0	0
AD	ASTHMA	14	92101229	93386328	3815	343	-0.235922	-0.53011	0.04025	0.0556594	0	0.28101	0.0892791	0	0
AD	ASTHMA	14	98268392	98885322	2343	248	-0.228984	-1	0.42088	0.0524335	0	1	0.435515	0	1
AD	ASTHMA	14	98885323	99474533	2323	260	-0.26826	-0.82198	0.17253	0.0719636	0	0.67624	0.220679	0	0
AD	ASTHMA	14	105091341	106347143	1972	239	-0.134516	-0.76475	0.41647	0.0180946	0	0.62487	0.577419	0	0
AD	ASTHMA	15	22799927	24099946	1858	285	0.309661	-0.15591	0.921	0.0958899	0	0.8506	0.180557	0	0
AD	ASTHMA	15	26392948	27563172	2887	345	-0.185898	-0.93197	0.42592	0.0345582	0	0.89908	0.499682	0	0
AD	ASTHMA	15	33484268	34410072	3064	330	-0.285012	-0.95848	0.20288	0.081232	0	0.92433	0.233671	0	0
AD	ASTHMA	15	34410073	35118927	1667	208	0.363473	-0.26767	1	0.132113	0	1	0.232198	0	1
AD	ASTHMA	15	35118928	36583327	3567	328	-0.506716	-1	0.04007	0.256762	0	1	0.0677525	0	1
AD	ASTHMA	15	37962916	39238840	3337	345	-0.420852	-1	0.17327	0.177117	0	1	0.153921	0	1
AD	ASTHMA	15	39238841	40604780	3365	315	-0.174538	-0.74268	0.33909	0.0304634	0	0.56426	0.463547	0	0
AD	ASTHMA	15	46022643	46884071	2038	200	0.743596	0.13561	1	0.552936	0.02302	1	0.0204262	1	1
AD	ASTHMA	15	50195877	51605477	3556	253	-0.265125	-1	0.437	0.0702915	0	1	0.399278	0	1
AD	ASTHMA	15	51605478	53263126	4412	302	0.292468	-0.7733	1	0.0855376	0	1	0.498662	0	1
AD	ASTHMA	15	54332800	55136717	2931	251	0.155607	-0.4192	0.88298	0.0242137	0	0.82911	0.558664	0	0
AD	ASTHMA	15	62106139	63218978	3026	346	0.0371623	-0.5027	0.62872	0.00138104	0	0.51043	0.878748	0	0
AD	ASTHMA	15	63218979	64339945	3159	283	0.257872	-0.18751	0.78136	0.0664982	0	0.6112	0.226564	0	0
AD	ASTHMA	15	70767984	72058129	2869	329	-0.345767	-1	0.27383	0.119555	0	1	0.242893	0	1
AD	ASTHMA	15	74458114	76401952	3690	322	0.504295	-0.04705	1	0.254313	0	1	0.0712458	0	1
AD	ASTHMA	15	79998207	81077025	3467	336	-0.131418	-0.87252	0.49838	0.0172706	0	0.84978	0.634691	0	0
AD	ASTHMA	15	81077026	82191077	2297	298	-0.443101	-0.99694	-0.02456	0.196339	0.0036	0.99388	0.0395244	0	0
AD	ASTHMA	15	82191078	84209760	3298	303	-0.17937	-1	0.80918	0.0321737	0	1	0.644349	0	1
AD	ASTHMA	15	90632719	91593623	2591	260	-0.051748	-0.52096	0.40166	0.00267786	0	0.31556	0.809281	0	0
AD	ASTHMA	15	91593624	92675405	2912	349	-0.0305596	-0.52797	0.44251	0.000933887	0	0.34318	0.89023	0	0
AD	ASTHMA	15	95662426	96864278	2970	353	0.0934924	-0.38938	0.60295	0.00874082	0	0.39121	0.680123	0	0
AD	ASTHMA	15	96864279	98025684	2803	346	-0.159993	-0.75143	0.36428	0.0255979	0	0.59536	0.512246	0	0
AD	ASTHMA	16	60169	1049079	2982	325	-0.447635	-1	0.19705	0.200377	0	1	0.161854	0	1
AD	ASTHMA	16	1996493	3379996	2360	354	0.600313	0.09279	1	0.360375	0.01287	1	0.0232096	1	1
AD	ASTHMA	16	6446082	7051429	3114	331	-0.463852	-1	0.15235	0.215159	0	1	0.125796	0	1
AD	ASTHMA	16	10351809	11022542	2124	290	-0.0924131	-0.47674	0.26388	0.00854018	0	0.23806	0.591752	0	0
AD	ASTHMA	16	12793150	13893407	4008	329	-0.00119294	-1	1	1.42e-06	0	1	0.997638	0	1
AD	ASTHMA	16	13893408	15921108	3047	322	0.206408	-0.30829	0.80371	0.0426044	0	0.66539	0.393556	0	0
AD	ASTHMA	16	15921109	17343277	2704	297	-0.180431	-1	0.45493	0.0325554	0	1	0.532281	0	1
AD	ASTHMA	16	17343278	19104257	3065	297	-0.237157	-1	0.68322	0.0562433	0	1	0.543537	0	1
AD	ASTHMA	16	20351262	22667048	3104	315	-0.17782	-0.96111	0.46275	0.0316198	0	1	0.536639	0	0
AD	ASTHMA	16	22667049	24014705	3469	325	0.0563293	-0.3464	0.47161	0.00317299	0	0.24921	0.769601	0	0
AD	ASTHMA	16	26154123	27443061	4181	386	-0.0709408	-0.50978	0.32591	0.00503259	0	0.30119	0.699352	0	0
AD	ASTHMA	16	29043178	31384210	2420	273	-0.567212	-1	0.03359	0.32173	0	1	0.0617712	0	1
AD	ASTHMA	16	53393883	54866095	3905	371	0.116426	-0.3924	0.71473	0.013555	0	0.55297	0.619797	0	0
AD	ASTHMA	16	54866096	55907389	3261	313	0.292816	-0.14071	0.8321	0.0857409	0	0.69239	0.182012	0	0
AD	ASTHMA	16	65882821	66738843	2310	305	-0.333586	-0.70183	-0.00937	0.11128	0.00149	0.49257	0.0446824	0	0
AD	ASTHMA	16	66738844	68435728	2800	243	-0.0738479	-0.95535	0.77732	0.00545352	0	1	0.820169	0	0
AD	ASTHMA	16	68435729	69549149	2488	249	0.107724	-0.51248	0.85629	0.0116045	0	0.82319	0.699832	0	0
AD	ASTHMA	16	74889128	75525959	1889	208	-0.36568	-1	0.16201	0.133722	0	1	0.14816	0	1
AD	ASTHMA	16	76635468	77270665	2316	246	-0.417071	-1	0.23264	0.173948	0	1	0.191061	0	1
AD	ASTHMA	16	77270666	77739132	2087	234	0.385147	-0.48135	1	0.148339	0	1	0.336951	0	1
AD	ASTHMA	16	77739133	78280636	2586	295	-0.711691	-1	-0.10775	0.506504	0.01566	1	0.0245972	0	1
AD	ASTHMA	16	78973581	79662634	2729	375	-0.0893511	-0.52638	0.30922	0.00798362	0	0.29274	0.641402	0	0
AD	ASTHMA	16	81437862	82310204	3399	365	0.151583	-0.45225	0.88681	0.0229774	0	0.82539	0.568814	0	0
AD	ASTHMA	16	85146806	86058597	2621	393	-0.0446026	-0.75961	0.63077	0.00198939	0	0.84672	0.873454	0	0
AD	ASTHMA	16	86058598	86748867	2958	376	0.226137	-0.25766	0.80005	0.0511381	0	0.64124	0.331994	0	0
AD	ASTHMA	16	88387229	89106304	2498	336	-0.286294	-0.74498	0.10305	0.081964	0	0.55499	0.135093	0	0
AD	ASTHMA	16	89106305	90292787	3632	301	-0.241301	-1	0.40685	0.0582263	0	1	0.427552	0	1
AD	ASTHMA	17	815654	1480056	2262	339	-0.0376152	-0.34968	0.26617	0.0014149	0	0.13674	0.798243	0	0
AD	ASTHMA	17	2699136	3430440	2013	277	0.0877345	-0.52846	0.79239	0.00769734	0	0.70928	0.746047	0	0
AD	ASTHMA	17	4463972	5573784	3431	311	-0.856295	-1	-0.16953	0.733241	0.0341	1	0.0160401	0	1
AD	ASTHMA	17	6305079	7264458	2573	334	0.107472	-0.2208	0.45488	0.0115502	0	0.20941	0.510672	0	0
AD	ASTHMA	17	10572618	11778164	3054	344	-0.122575	-0.56021	0.30784	0.0150245	0	0.32864	0.543789	0	0
AD	ASTHMA	17	11778165	12676353	2134	279	-0.0758836	-0.46006	0.29679	0.00575832	0	0.21986	0.67675	0	0
AD	ASTHMA	17	13648447	14508610	2719	309	0.292887	-0.10743	0.77829	0.085783	0	0.60573	0.147491	0	0
AD	ASTHMA	17	20402495	21432873	1478	238	-0.457008	-1	-0.02351	0.208857	0.00331	1	0.0397404	0	1
AD	ASTHMA	17	21432874	25872110	2790	202	0.0653382	-0.54356	0.72057	0.00426908	0	0.64768	0.804775	0	0
AD	ASTHMA	17	29783142	31318753	3430	342	0.914543	0.34187	1	0.836389	0.11688	1	0.00286013	1	1
AD	ASTHMA	17	31318754	32356061	3311	363	-0.0555549	-0.55733	0.43035	0.00308635	0	0.36093	0.798687	0	0
AD	ASTHMA	17	33614190	34474611	2334	257	-0.371199	-1	0.23319	0.137789	0	1	0.197611	0	1
AD	ASTHMA	17	34474612	36116884	2551	324	0.131086	-0.37802	0.72209	0.0171836	0	0.53809	0.575741	0	0
AD	ASTHMA	17	36116885	37361178	2298	318	-0.116067	-0.54474	0.27238	0.0134717	0	0.30043	0.541896	0	0
AD	ASTHMA	17	40233546	42348003	3737	326	0.248804	-0.43226	1	0.0619036	0	1	0.420172	0	1
AD	ASTHMA	17	42348004	43460500	2466	264	0.469139	0.1385	0.92951	0.220091	0.01929	0.86399	0.00757597	1	0
AD	ASTHMA	17	43460501	44865832	2629	142	-0.271124	-1	0.56319	0.0735082	0	1	0.448371	0	1
AD	ASTHMA	17	44865833	45883901	2117	180	-0.247082	-1	0.33562	0.0610498	0	1	0.365959	0	1
AD	ASTHMA	17	47516225	48722590	2714	382	-0.00909579	-0.4175	0.39792	8.27e-05	0	0.22758	0.961569	0	0
AD	ASTHMA	17	60453121	62112373	2550	290	0.273764	-0.15633	0.90701	0.0749468	0	0.82491	0.21014	0	0
AD	ASTHMA	17	64438388	65582327	2982	348	0.371509	-0.31146	1	0.138019	0	1	0.248207	0	1
AD	ASTHMA	17	65582328	66757556	2896	320	-0.0988349	-0.62952	0.40426	0.00976833	0	0.42795	0.675526	0	0
AD	ASTHMA	17	69245591	70495119	3077	351	0.0891399	-0.81795	1	0.00794592	0	1	0.796593	0	1
AD	ASTHMA	17	70495120	71466953	2780	372	-0.583565	-1	-0.08506	0.340548	0.01042	1	0.0240972	0	1
AD	ASTHMA	17	72383473	73741321	3484	335	0.189475	-0.25752	0.7052	0.0359009	0	0.49978	0.380561	0	0
AD	ASTHMA	17	73741322	74908266	3059	310	0.098253	-1	1	0.00965364	0	1	0.828628	0	1
AD	ASTHMA	17	74908267	75619256	2399	333	0.609834	-0.14748	1	0.371898	0	1	0.0993461	0	1
AD	ASTHMA	17	76596288	77412786	2659	356	0.0370467	-0.44526	0.55459	0.00137246	0	0.39845	0.86552	0	0
AD	ASTHMA	17	77412787	78438332	2857	346	-0.303574	-0.96656	0.18706	0.092157	0	0.93586	0.212212	0	0
AD	ASTHMA	17	78438333	79333774	3160	305	0.213892	-0.16932	0.63336	0.0457498	0	0.40114	0.255058	0	0
AD	ASTHMA	17	80459150	81192460	2068	228	-0.038588	-0.87032	0.75427	0.00148903	0	1	0.900683	0	0
AD	ASTHMA	18	10719	848350	2361	292	0.306395	-0.13249	0.92614	0.0938782	0	0.85774	0.168997	0	0
AD	ASTHMA	18	1940212	2839842	2903	307	-0.777618	-1	-0.25448	0.60469	0.06476	1	0.00415171	0	1
AD	ASTHMA	18	2839843	3722828	2482	335	0.300447	-0.25062	1	0.0902683	0	1	0.275305	0	1
AD	ASTHMA	18	3722829	4603961	2410	327	0.102639	-0.21036	0.43661	0.0105348	0	0.19395	0.515167	0	0
AD	ASTHMA	18	4603962	5575812	2782	308	0.244049	-0.37544	1	0.0595597	0	1	0.394925	0	1
AD	ASTHMA	18	7862480	8788524	2871	321	0.0941016	-0.35839	0.56884	0.00885511	0	0.33461	0.655442	0	0
AD	ASTHMA	18	8788525	9816164	3469	342	0.127244	-0.34795	0.65552	0.0161911	0	0.44829	0.580533	0	0
AD	ASTHMA	18	9816165	10675548	2650	354	0.107547	-0.44722	0.74305	0.0115663	0	0.60524	0.67115	0	0
AD	ASTHMA	18	14439252	15220934	980	104	-0.447258	-1	0.58136	0.20004	0	1	0.325007	0	1
AD	ASTHMA	18	24088164	25305260	3212	328	0.401857	-0.07349	1	0.161489	0	1	0.0985928	0	1
AD	ASTHMA	18	25305261	26861067	3447	283	-0.398966	-1	0.11514	0.159174	0	1	0.120769	0	1
AD	ASTHMA	18	30401129	32458907	4341	328	0.360811	-0.33368	1	0.130185	0	1	0.290524	0	1
AD	ASTHMA	18	32458908	34153297	3810	345	-0.145169	-0.81223	0.44692	0.0210741	0	0.70114	0.586549	0	0
AD	ASTHMA	18	38498382	39410165	2237	251	-0.20832	-1	0.43098	0.0433971	0	1	0.472948	0	1
AD	ASTHMA	18	40471408	41425454	2493	254	0.203143	-0.60506	1	0.041267	0	1	0.553961	0	1
AD	ASTHMA	18	47455926	48228379	2331	272	-0.343017	-1	0.27427	0.117661	0	1	0.239528	0	1
AD	ASTHMA	18	53762997	54957867	2957	281	0.155386	-0.73231	1	0.0241447	0	1	0.655901	0	1
AD	ASTHMA	18	58527237	59449422	2358	274	0.264806	-0.32996	1	0.0701224	0	1	0.353262	0	1
AD	ASTHMA	18	60780195	62074993	3500	312	-0.288784	-0.87063	0.17422	0.0833961	0	0.75932	0.211502	0	0
AD	ASTHMA	18	62074994	63109755	2921	232	-0.0442547	-0.72428	0.61023	0.00195848	0	0.66186	0.873461	0	0
AD	ASTHMA	18	64253144	65294195	3081	227	0.540783	-0.22672	1	0.292446	0	1	0.14877	0	1
AD	ASTHMA	18	65294196	66407960	3710	286	0.387054	-0.23342	1	0.149811	0	1	0.192255	0	1
AD	ASTHMA	18	71491861	72785206	3389	340	-0.127475	-0.85191	0.47471	0.01625	0	0.83194	0.623548	0	0
AD	ASTHMA	18	74471746	75240760	2992	326	0.18792	-0.70693	1	0.0353138	0	1	0.608363	0	1
AD	ASTHMA	18	76231686	77148137	3554	285	0.366542	-0.55593	1	0.134353	0	1	0.37456	0	1
AD	ASTHMA	18	77148138	78017072	2734	293	-0.251069	-0.79755	0.20637	0.0630355	0	0.63659	0.268142	0	0
AD	ASTHMA	19	64705	762046	1768	317	-0.11829	-0.6604	0.39178	0.0139925	0	0.45856	0.612365	0	0
AD	ASTHMA	19	762047	1515920	1982	330	0.0682012	-0.21357	0.35638	0.0046514	0	0.13147	0.627929	0	0
AD	ASTHMA	19	1515921	2253174	1751	304	-0.215331	-0.52205	0.07232	0.0463673	0	0.27254	0.138661	0	0
AD	ASTHMA	19	2253175	3085446	2491	329	-0.104819	-0.50208	0.26281	0.0109869	0	0.2604	0.564323	0	0
AD	ASTHMA	19	3085447	3893909	2254	324	-0.095374	-0.58908	0.35218	0.00909621	0	0.36056	0.652026	0	0
AD	ASTHMA	19	7249360	8199016	2706	323	0.00999365	-0.57023	0.60524	9.99e-05	0	0.50283	0.968103	0	0
AD	ASTHMA	19	8199017	9105577	2311	296	-0.523253	-1	-0.11016	0.273794	0.01371	1	0.0172574	0	1
AD	ASTHMA	19	11681979	13213186	3330	289	0.278299	-0.42919	1	0.0774502	0	1	0.399366	0	1
AD	ASTHMA	19	13213187	13968319	1831	290	-0.379565	-0.78963	-0.02627	0.14407	0.00272	0.62351	0.0363258	0	0
AD	ASTHMA	19	14891101	15650185	2250	280	0.0491478	-0.26735	0.36819	0.00241551	0	0.1436	0.746376	0	0
AD	ASTHMA	19	16079007	17045963	2308	253	-0.194405	-1	0.5062	0.0377935	0	1	0.525857	0	1
AD	ASTHMA	19	17045964	17750518	2130	288	0.101753	-0.36189	0.62093	0.0103536	0	0.41395	0.643466	0	0
AD	ASTHMA	19	17750519	18504867	1938	278	-0.148173	-1	0.85638	0.0219553	0	1	0.701668	0	1
AD	ASTHMA	19	18504868	19749166	2726	296	0.241052	-0.34347	1	0.0581061	0	1	0.370153	0	1
AD	ASTHMA	19	19749167	20485499	2172	194	0.184749	-0.50485	1	0.0341323	0	1	0.553645	0	1
AD	ASTHMA	19	20485500	21155862	2112	105	0.0782242	-0.7306	0.8993	0.00611903	0	1	0.807067	0	0
AD	ASTHMA	19	28555846	29389090	3137	245	-0.311029	-1	0.60147	0.0967389	0	1	0.430945	0	1
AD	ASTHMA	19	30375793	31763008	2912	351	-0.568995	-1	0.15831	0.323755	0	1	0.126166	0	1
AD	ASTHMA	19	31763009	33028099	3030	333	0.252668	-0.60791	1	0.0638413	0	1	0.483094	0	1
AD	ASTHMA	19	33028100	33785835	2543	231	0.265638	-0.1014	0.70732	0.0705634	0	0.5003	0.156337	0	0
AD	ASTHMA	19	33785836	34633274	2584	303	-0.188978	-0.66976	0.23223	0.0357126	0	0.44978	0.349708	0	0
AD	ASTHMA	19	35649344	36638122	2618	324	0.370807	-0.10563	1	0.137498	0	1	0.117107	0	1
AD	ASTHMA	19	38472871	39370419	2505	264	-0.0287013	-0.78487	0.74061	0.000823765	0	0.94007	0.923696	0	0
AD	ASTHMA	19	39370420	40171413	2254	269	-0.102803	-0.491	0.26272	0.0105685	0	0.24599	0.571319	0	0
AD	ASTHMA	19	40171414	41004105	2168	243	-0.138055	-0.70489	0.3634	0.0190593	0	0.50645	0.55406	0	0
AD	ASTHMA	19	41004106	41733463	1963	261	0.0842765	-0.37628	0.54647	0.00710252	0	0.32705	0.694465	0	0
AD	ASTHMA	19	41733464	43317282	2664	300	0.31217	-0.25493	1	0.0974502	0	1	0.245134	0	1
AD	ASTHMA	19	43960959	45040932	3073	290	0.0956161	-0.25355	0.48563	0.00914244	0	0.24684	0.559696	0	0
AD	ASTHMA	19	45040933	45893307	2167	318	-0.137235	-0.2603	-0.01675	0.0188334	0.00044	0.06776	0.0269982	0	0
AD	ASTHMA	19	45893308	46765060	2273	284	0.223081	-0.02105	0.49088	0.0497651	0	0.24097	0.0706656	0	0
AD	ASTHMA	19	46765061	47752727	2330	323	-0.108599	-0.42083	0.18986	0.0117937	0	0.17819	0.463753	0	0
AD	ASTHMA	19	47752728	48573065	2248	273	0.00064021	-0.58486	0.57324	4.1e-07	0	0.4954	0.997929	0	0
AD	ASTHMA	19	48573066	49415189	2480	284	-0.138491	-0.58317	0.27175	0.0191796	0	0.3458	0.490975	0	0
AD	ASTHMA	19	49415190	50451925	2506	325	-0.0242899	-0.38561	0.35023	0.000590001	0	0.1838	0.889663	0	0
AD	ASTHMA	19	50451926	51259178	1952	296	0.293438	-0.06391	0.68528	0.0861056	0	0.4696	0.100369	0	0
AD	ASTHMA	19	51259179	51903804	1780	303	0.271796	-0.03488	0.59643	0.0738733	0	0.35573	0.0762303	0	0
AD	ASTHMA	19	51903805	52678748	2876	304	-0.5286	-1	-0.14271	0.279418	0.02082	1	0.007332	0	1
AD	ASTHMA	19	52678749	53431217	2682	290	-0.709675	-1	-0.01077	0.503639	0.00843	1	0.0489041	0	1
AD	ASTHMA	19	54042241	54602370	1467	284	-0.211693	-0.78639	0.26906	0.0448138	0	0.63742	0.363414	0	0
AD	ASTHMA	19	54602371	55182973	1860	289	-0.375216	-1	0.15534	0.140787	0	1	0.155812	0	1
AD	ASTHMA	19	57959953	59118811	2662	285	-0.234145	-1	0.81137	0.0548239	0	1	0.562096	0	1
AD	ASTHMA	20	60795	884241	2552	361	-0.280899	-0.82205	0.17286	0.0789041	0	0.67691	0.204525	0	0
AD	ASTHMA	20	4591848	5379450	2295	285	-0.416529	-1	0.13755	0.173497	0	1	0.137262	0	1
AD	ASTHMA	20	5379451	6128358	2323	289	0.399771	-0.05175	1	0.159817	0	1	0.0796531	0	1
AD	ASTHMA	20	7959829	9279550	3445	343	-0.273326	-1	0.42717	0.074707	0	1	0.397421	0	1
AD	ASTHMA	20	9279551	10279603	2619	322	-0.393556	-1	0.34344	0.154887	0	1	0.259511	0	1
AD	ASTHMA	20	10279604	11257012	2776	323	0.556257	0.11246	1	0.309422	0.01495	1	0.0168518	1	1
AD	ASTHMA	20	15238520	15962576	2236	285	-0.171938	-1	1	0.0295626	0	1	0.706414	0	1
AD	ASTHMA	20	15962577	16661516	2631	271	0.644865	-0.05161	1	0.415851	0	1	0.0725322	0	1
AD	ASTHMA	20	17359291	18058524	2192	277	0.33282	-0.22108	1	0.110769	0	1	0.216737	0	1
AD	ASTHMA	20	22780957	23808562	3145	306	0.142997	-0.95842	1	0.020448	0	1	0.73128	0	1
AD	ASTHMA	20	25181039	26318858	2060	147	1	0.22069	1	1	0.05941	1	0.0047217	1	1
AD	ASTHMA	20	35990262	37253657	2796	330	-0.0216266	-0.76703	0.69845	0.000467709	0	0.83973	0.940925	0	0
AD	ASTHMA	20	41351515	42185671	2234	313	0.325876	-0.23726	1	0.106195	0	1	0.226327	0	1
AD	ASTHMA	20	45673604	46486132	2011	277	0.00793502	-0.49792	0.52229	6.3e-05	0	0.4069	0.970763	0	0
AD	ASTHMA	20	46486133	47203836	2075	273	-0.597083	-1	-0.14812	0.356508	0.02342	1	0.0110089	0	1
AD	ASTHMA	20	48212976	49236418	2869	312	-0.209265	-1	0.48723	0.0437917	0	1	0.497484	0	1
AD	ASTHMA	20	49236419	50653620	4072	365	0.265078	-0.32331	1	0.0702665	0	1	0.338713	0	1
AD	ASTHMA	20	51533751	52411532	2114	338	-0.0211205	-0.5109	0.44769	0.000446076	0	0.32883	0.923511	0	0
AD	ASTHMA	20	52411533	53120334	2355	264	-0.0584844	-0.58007	0.43629	0.00342043	0	0.38045	0.797479	0	0
AD	ASTHMA	20	53120335	53879803	2109	212	-0.695244	-1	0.20335	0.483365	0	1	0.122612	0	1
AD	ASTHMA	20	54743695	55448075	2109	305	-0.171235	-0.83649	0.33812	0.0293216	0	0.73643	0.483964	0	0
AD	ASTHMA	20	56951774	57924037	2327	339	0.316222	-0.23823	1	0.0999963	0	1	0.243853	0	1
AD	ASTHMA	20	58780895	59560457	2390	287	0.0292184	-0.43928	0.51488	0.000853714	0	0.32206	0.892367	0	0
AD	ASTHMA	21	15840034	16873443	2602	330	0.536429	0.03882	1	0.287757	0.00536	1	0.0380069	1	1
AD	ASTHMA	21	18222038	19479024	3472	327	-0.305999	-1	0.46157	0.0936355	0	1	0.368424	0	1
AD	ASTHMA	21	20407308	21632916	3991	301	-0.124321	-1	0.8286	0.0154558	0	1	0.73647	0	1
AD	ASTHMA	21	21632917	22201890	2160	249	-0.168866	-0.80871	0.38708	0.0285157	0	0.67813	0.499326	0	0
AD	ASTHMA	21	22201891	23266941	3269	280	0.958173	0.11435	1	0.918096	0.02834	1	0.0295304	1	1
AD	ASTHMA	21	23266942	24055941	2100	277	-0.160781	-1	0.51418	0.0258507	0	1	0.599229	0	1
AD	ASTHMA	21	25247987	26467826	3760	280	0.315216	-0.61404	1	0.0993608	0	1	0.418359	0	1
AD	ASTHMA	21	27774351	28616539	2693	265	0.115236	-0.2835	0.53646	0.0132795	0	0.29062	0.552814	0	0
AD	ASTHMA	21	29449871	30847296	3470	205	0.321351	-0.34736	1	0.103267	0	1	0.290624	0	1
AD	ASTHMA	21	33270273	34383794	2754	302	0.0488194	-0.56568	0.71743	0.00238334	0	0.64044	0.857471	0	0
AD	ASTHMA	21	34383795	35729261	3234	356	-1	-1	-0.29463	1	0.08801	1	0.00605663	0	1
AD	ASTHMA	21	38046450	39252059	3429	313	-0.302797	-1	0.29432	0.091686	0	1	0.29069	0	1
AD	ASTHMA	21	39252060	40480831	3262	351	-0.191547	-0.55662	0.14983	0.0366902	0	0.31038	0.257333	0	0
AD	ASTHMA	21	42187153	43081434	2677	353	0.26548	-0.28935	0.99118	0.0704798	0	0.99743	0.311306	0	0
AD	ASTHMA	21	43081435	43812791	2953	359	0.409552	-0.15107	1	0.167733	0	1	0.143655	0	1
AD	ASTHMA	21	43812792	44815008	3467	338	0.384244	-0.05799	1	0.147643	0	1	0.0879621	0	1
AD	ASTHMA	21	44815009	46045433	3381	352	0.0831321	-0.48965	0.72447	0.00691094	0	0.59422	0.744822	0	0
AD	ASTHMA	22	17587475	18535225	3048	343	0.109201	-0.32035	0.57719	0.0119248	0	0.33967	0.598897	0	0
AD	ASTHMA	22	19635655	20969184	2575	315	-0.136461	-0.73166	0.40008	0.0186215	0	0.56553	0.575949	0	0
AD	ASTHMA	22	20969185	22404422	2447	248	0.326667	-0.03214	0.72606	0.106711	0	0.52716	0.0691373	0	0
AD	ASTHMA	22	23143365	23950732	2240	260	0.0222269	-0.99666	1	0.000494035	0	1	0.951361	0	1
AD	ASTHMA	22	25282437	26166934	2225	282	-0.382694	-0.91368	0.02624	0.146455	0	0.83482	0.0700771	0	0
AD	ASTHMA	22	27192924	27952441	2729	365	0.0993268	-0.68139	0.97519	0.0098658	0	1	0.751938	0	0
AD	ASTHMA	22	32662294	33501725	2886	299	0.14301	-0.24972	0.5627	0.0204518	0	0.31937	0.456921	0	0
AD	ASTHMA	22	35368342	36135968	2318	279	-0.212141	-1	0.44335	0.0450039	0	1	0.464146	0	1
AD	ASTHMA	22	36135969	37364004	3261	335	-0.0811016	-0.76036	0.54785	0.00657747	0	0.71229	0.76522	0	0
AD	ASTHMA	22	37364005	38718589	3430	360	0.0642993	-0.38159	0.54543	0.0041344	0	0.32946	0.760247	0	0
AD	ASTHMA	22	38718590	40378783	3498	352	-0.334172	-0.86459	0.08161	0.111671	0	0.74752	0.114482	0	0
AD	ASTHMA	22	44409534	45170649	2664	368	-0.11319	-0.84252	0.49532	0.012812	0	0.82779	0.667878	0	0
AD	ASTHMA	22	48269178	48977538	2555	337	0.787277	0.1202	1	0.619805	0.02183	1	0.0217734	1	1
AD	ASTHMA	22	49559208	50347996	2983	302	0.172878	-0.25441	0.63927	0.0298867	0	0.41256	0.406595	0	0
AD	ASTHMA	22	50347997	51244236	2734	309	-1	-1	-0.39224	1	0.15385	1	0.000399647	0	1
AD	ATOPIC	1	10539	1376204	1877	271	0.101293	-0.24714	0.52928	0.0102602	0	0.29598	0.522118	0	0
AD	ATOPIC	1	3582048	4281476	2521	316	-0.0625902	-0.34412	0.19959	0.00391753	0	0.12281	0.615346	0	0
AD	ATOPIC	1	5362405	6136814	2535	346	0.26352	-0.02093	0.78785	0.069443	0	0.6207	0.0717435	0	0
AD	ATOPIC	1	8580988	9475966	1654	231	0.089023	-0.17601	0.36315	0.00792509	0	0.13281	0.499418	0	0
AD	ATOPIC	1	10753428	11709173	2374	319	0.0892047	-0.17584	0.39784	0.00795747	0	0.16522	0.490155	0	0
AD	ATOPIC	1	13481026	14720131	3569	367	0.161184	-0.12671	0.56116	0.0259804	0	0.31803	0.248575	0	0
AD	ATOPIC	1	15755231	16732168	2915	274	0.0532636	-0.34427	0.53261	0.00283702	0	0.35155	0.754679	0	0
AD	ATOPIC	1	19238925	20556202	4148	365	-0.177805	-0.39696	0.01614	0.0316147	0	0.15757	0.0790971	0	0
AD	ATOPIC	1	21416122	22145629	2284	293	0.119459	-0.07571	0.33123	0.0142706	0	0.10972	0.226435	0	0
AD	ATOPIC	1	29188427	30405182	3087	348	0.038435	-0.23703	0.32947	0.00147725	0	0.12084	0.768294	0	0
AD	ATOPIC	1	30405183	31639217	4374	375	-0.31805	-0.72066	-0.09218	0.101156	0.00859	0.51936	0.00742729	0	0
AD	ATOPIC	1	34371023	35201626	2674	341	0.0581715	-0.15253	0.27622	0.00338392	0	0.07751	0.571916	0	0
AD	ATOPIC	1	40200951	41093875	2377	293	-0.121104	-0.34314	0.08793	0.0146661	0	0.11775	0.248492	0	0
AD	ATOPIC	1	41093876	41977966	2616	308	-0.0670224	-0.47357	0.28272	0.00449201	0	0.26243	0.661575	0	0
AD	ATOPIC	1	54771294	55727134	3219	362	0.203012	-0.01027	0.45898	0.0412137	0	0.21066	0.0626554	0	0
AD	ATOPIC	1	56799637	57529670	2393	308	0.306507	0.02313	0.87303	0.0939466	0.00216	0.76219	0.0356206	1	0
AD	ATOPIC	1	57529671	58387483	2660	308	-0.0145912	-0.29931	0.26391	0.000212904	0	0.11606	0.909972	0	0
AD	ATOPIC	1	59889046	61377615	3585	359	-0.0834377	-0.5026	0.24979	0.00696185	0	0.27368	0.585829	0	0
AD	ATOPIC	1	65894185	66778015	2438	243	0.029599	-0.35738	0.44815	0.000876099	0	0.28304	0.854946	0	0
AD	ATOPIC	1	67761891	68633860	2434	316	0.118655	-0.13495	0.41656	0.0140791	0	0.1749	0.343337	0	0
AD	ATOPIC	1	68633861	69438909	2285	254	0.247036	-0.11552	0.87791	0.0610269	0	0.78292	0.165605	0	0
AD	ATOPIC	1	70992906	72513119	3528	303	0.0936288	-0.14847	0.35569	0.00876636	0	0.12793	0.427593	0	0
AD	ATOPIC	1	76097248	76977915	2761	279	-0.12119	-0.5216	0.20109	0.0146871	0	0.27921	0.419906	0	0
AD	ATOPIC	1	84728348	86017267	3098	287	0.0810842	-0.22631	0.43481	0.00657465	0	0.1997	0.57661	0	0
AD	ATOPIC	1	86761555	87667572	1725	105	-0.0138468	-0.50485	0.4678	0.000191734	0	0.34596	0.948906	0	0
AD	ATOPIC	1	87667573	88656689	1753	222	-0.133827	-0.66073	0.34499	0.0179096	0	0.44765	0.552118	0	0
AD	ATOPIC	1	89753965	90941549	1998	179	0.174506	-0.12748	0.51506	0.0304523	0	0.2657	0.254945	0	0
AD	ATOPIC	1	90941550	91870059	1749	143	0.311131	-0.12781	1	0.0968028	0	1	0.149005	0	1
AD	ATOPIC	1	91870060	92904465	2036	170	0.264929	-0.18286	0.90043	0.0701871	0	0.81827	0.214074	0	0
AD	ATOPIC	1	99425001	100269207	2319	252	-0.157529	-0.37393	0.04377	0.0248153	0	0.13983	0.121005	0	0
AD	ATOPIC	1	107874654	109271449	2478	188	0.42969	0.01001	1	0.184634	0.00257	1	0.0504909	1	1
AD	ATOPIC	1	109271450	110224230	1990	244	0.396314	0.18336	0.67149	0.157065	0.03362	0.4509	0.000371232	1	0
AD	ATOPIC	1	114664388	116207297	4563	365	-0.0994067	-0.43768	0.18274	0.0098817	0	0.19929	0.467135	0	0
AD	ATOPIC	1	117046312	118118667	2398	336	0.114138	-0.16081	0.4348	0.0130275	0	0.19461	0.380515	0	0
AD	ATOPIC	1	120345067	145803848	1060	243	0.447655	0.31909	0.57654	0.200395	0.10182	0.3324	5.13e-11	1	0
AD	ATOPIC	1	145803849	147083835	2348	209	-0.0536402	-0.54851	0.36318	0.00287727	0	0.38849	0.766051	0	0
AD	ATOPIC	1	147083836	149716037	1296	225	-0.0347444	-0.24137	0.1736	0.00120717	0	0.06177	0.730443	0	0
AD	ATOPIC	1	149716038	151146407	2625	264	-0.0970355	-0.42707	0.18714	0.00941588	0	0.18726	0.478979	0	0
AD	ATOPIC	1	151146408	152535630	2671	311	0.171502	-0.04382	0.41857	0.0294128	0	0.1752	0.110909	0	0
AD	ATOPIC	1	161054077	161945442	2423	287	0.00762175	-0.21823	0.23367	5.81e-05	0	0.06921	0.944132	0	0
AD	ATOPIC	1	163141863	163854567	2284	262	0.260735	0.05085	0.50857	0.0679827	0.00299	0.25864	0.0155021	1	0
AD	ATOPIC	1	164726580	165553812	2613	325	0.171825	-0.06387	0.45923	0.0295239	0	0.21102	0.155337	0	0
AD	ATOPIC	1	165553813	166458031	2377	311	0.0642135	-0.16251	0.29451	0.00412337	0	0.08825	0.560402	0	0
AD	ATOPIC	1	167163955	168179086	2740	348	0.0609146	-0.22845	0.40808	0.00371059	0	0.17915	0.652386	0	0
AD	ATOPIC	1	169521552	170193207	2404	198	0.0979431	-0.24048	0.48389	0.00959285	0	0.24629	0.528145	0	0
AD	ATOPIC	1	170193208	171044255	2211	262	-0.0440891	-0.42613	0.28597	0.00194385	0	0.21026	0.770119	0	0
AD	ATOPIC	1	172465154	173582511	2417	324	-0.0658402	-0.26783	0.12668	0.00433493	0	0.07192	0.495791	0	0
AD	ATOPIC	1	173582512	175385220	4028	268	-0.161386	-0.58811	0.15805	0.0260453	0	0.35432	0.280051	0	0
AD	ATOPIC	1	175385221	176449096	2636	301	0.0432156	-0.23379	0.34113	0.00186759	0	0.1281	0.740158	0	0
AD	ATOPIC	1	177746473	178915113	2735	282	-0.394487	-0.84362	-0.12256	0.15562	0.01519	0.7117	0.00509366	0	0
AD	ATOPIC	1	181324206	182420540	3008	329	0.0323523	-0.28312	0.37079	0.00104667	0	0.1705	0.822186	0	0
AD	ATOPIC	1	186179448	187072605	2347	240	0.213172	-0.07021	0.60138	0.0454423	0	0.36209	0.1329	0	0
AD	ATOPIC	1	193575517	194365688	2659	225	0.0915702	-0.26997	0.55	0.0083851	0	0.32833	0.587582	0	0
AD	ATOPIC	1	199263390	200134005	2900	256	0.280893	-0.0409	0.88739	0.0789008	0	0.78746	0.087515	0	0
AD	ATOPIC	1	204092538	205009623	2659	335	0.0417513	-0.13291	0.22395	0.00174317	0	0.05195	0.637468	0	0
AD	ATOPIC	1	205009624	205917548	2743	320	0.129771	-0.1863	0.56718	0.0168405	0	0.34123	0.392538	0	0
AD	ATOPIC	1	205917549	208162951	4192	377	0.0282405	-0.15016	0.20718	0.000797525	0	0.04522	0.753446	0	0
AD	ATOPIC	1	212347583	213958292	4474	370	0.326902	0.04217	0.95402	0.106865	0.00322	0.9124	0.0305417	1	0
AD	ATOPIC	1	213958293	214783872	2424	313	0.438473	0.17372	0.9969	0.192259	0.03018	0.99381	0.00139231	1	0
AD	ATOPIC	1	214783873	215825791	2477	276	0.218552	-0.04944	0.6188	0.047765	0	0.3834	0.104925	0	0
AD	ATOPIC	1	215825792	216658126	2371	315	-0.231644	-0.53463	0.00782	0.0536588	0	0.28583	0.0560377	0	0
AD	ATOPIC	1	220073133	220978151	2541	263	-0.0785582	-0.48204	0.27173	0.00617139	0	0.26012	0.618289	0	0
AD	ATOPIC	1	220978152	221856864	2541	262	-0.181482	-0.46535	0.06858	0.0329357	0	0.21655	0.1363	0	0
AD	ATOPIC	1	222763598	223654902	2227	258	0.268503	-0.05261	0.86283	0.0720937	0	0.74481	0.107	0	0
AD	ATOPIC	1	229075157	230227247	2849	370	0.089882	-0.24524	0.51469	0.00807877	0	0.28502	0.549126	0	0
AD	ATOPIC	1	231287765	232177704	2352	309	0.248999	0.03287	0.52449	0.0620005	0.00182	0.27508	0.0252913	1	0
AD	ATOPIC	1	232177705	232954942	2638	339	-0.119062	-0.43064	0.14361	0.0141758	0	0.18973	0.348087	0	0
AD	ATOPIC	1	232954943	233639473	2323	284	-0.251744	-0.56202	-0.01311	0.0633749	0.00112	0.31587	0.0374548	0	0
AD	ATOPIC	1	233639474	234365796	2744	314	0.0820109	-0.15645	0.33728	0.00672579	0	0.11664	0.483193	0	0
AD	ATOPIC	1	234365797	235097113	2407	351	0.215875	-0.02452	0.51741	0.0466021	0	0.26771	0.0769949	0	0
AD	ATOPIC	1	238094456	238704857	2366	241	0.364605	0.0593	1	0.132937	0.00513	1	0.0235535	1	1
AD	ATOPIC	1	238704858	239332148	2511	252	0.0425088	-0.23168	0.32576	0.001807	0	0.11674	0.74354	0	0
AD	ATOPIC	1	241813535	242417923	2286	308	-0.00902121	-0.2569	0.24406	8.14e-05	0	0.09061	0.939929	0	0
AD	ATOPIC	1	242417924	243048003	2294	288	-0.252471	-0.59718	-0.00295	0.0637418	0.00096	0.35663	0.0487358	0	0
AD	ATOPIC	1	243048004	244723196	3803	385	-0.183783	-0.42798	0.02309	0.0337762	0	0.18316	0.0829917	0	0
AD	ATOPIC	1	247531113	248341594	3005	312	-0.0604286	-0.28357	0.15189	0.00365161	0	0.08168	0.573139	0	0
AD	ATOPIC	1	248341595	249240538	1843	222	0.0546805	-0.16561	0.27866	0.00298996	0	0.07912	0.603533	0	0
AD	ATOPIC	2	789196	1376545	2518	234	0.0665186	-0.3324	0.52472	0.00442473	0	0.3395	0.701985	0	0
AD	ATOPIC	2	1875061	2680063	2541	333	0.0633849	-0.21936	0.38038	0.00401765	0	0.15369	0.642203	0	0
AD	ATOPIC	2	2680064	3314202	2340	321	-0.0710831	-0.55029	0.31899	0.0050528	0	0.37211	0.676931	0	0
AD	ATOPIC	2	4016105	4766969	2466	309	0.0732632	-0.19534	0.36886	0.0053675	0	0.14069	0.572917	0	0
AD	ATOPIC	2	4766970	5568653	2268	306	-0.0510776	-0.25087	0.14684	0.00260892	0	0.06484	0.601319	0	0
AD	ATOPIC	2	5568654	6306606	2558	310	0.0572209	-0.27519	0.42287	0.00327424	0	0.21034	0.699199	0	0
AD	ATOPIC	2	6306607	7108208	2283	308	-0.109959	-0.39181	0.12795	0.0120911	0	0.15407	0.358492	0	0
AD	ATOPIC	2	7108209	7966709	2463	301	0.47502	0.22199	0.99556	0.225644	0.04928	0.99113	0.000495962	1	0
AD	ATOPIC	2	7966710	8978798	2746	384	-0.300908	-0.6605	-0.06877	0.0905458	0.00503	0.43626	0.0137585	0	0
AD	ATOPIC	2	13625451	14692120	3518	299	-0.106008	-0.44076	0.16729	0.0112376	0	0.19609	0.425911	0	0
AD	ATOPIC	2	29627933	30575619	2851	340	0.412471	0.16077	0.86785	0.170133	0.02597	0.75316	0.00154209	1	0
AD	ATOPIC	2	30575620	31457418	3178	326	0.217355	-0.04534	0.60062	0.0472433	0	0.36074	0.105975	0	0
AD	ATOPIC	2	34239777	34890558	2312	266	-0.176492	-0.41658	0.03941	0.0311494	0	0.17354	0.105672	0	0
AD	ATOPIC	2	43295777	44104110	2484	292	0.342366	0.06299	0.84915	0.117214	0.0048	0.72105	0.0161129	1	0
AD	ATOPIC	2	44104111	45189468	3007	326	-0.0117563	-0.30467	0.2711	0.000138211	0	0.11601	0.926845	0	0
AD	ATOPIC	2	45850048	46499326	2381	362	-0.0332207	-0.41804	0.31441	0.00110361	0	0.21498	0.826177	0	0
AD	ATOPIC	2	46499327	47320114	2823	340	0.206605	-0.08355	0.71959	0.0426855	0	0.52055	0.162385	0	0
AD	ATOPIC	2	52494112	53032976	2348	210	0.263956	-0.07456	0.81943	0.0696728	0	0.67529	0.116867	0	0
AD	ATOPIC	2	54688235	55663336	2976	295	0.00979931	-0.33342	0.37016	9.6e-05	0	0.18678	0.947046	0	0
AD	ATOPIC	2	57433654	57952945	1995	197	-0.0663491	-0.55603	0.33558	0.00440221	0	0.36269	0.706323	0	0
AD	ATOPIC	2	64696090	65938002	3122	348	-0.170216	-0.48077	0.09778	0.0289736	0	0.23213	0.188953	0	0
AD	ATOPIC	2	68877775	70756283	4422	341	0.203705	-0.12344	0.74474	0.0414956	0	0.55709	0.206437	0	0
AD	ATOPIC	2	71385814	72160302	2304	304	-0.102625	-0.53572	0.22614	0.0105319	0	0.29382	0.498931	0	0
AD	ATOPIC	2	73544291	75148103	3033	331	0.0199945	-0.36538	0.42035	0.000399782	0	0.25846	0.900874	0	0
AD	ATOPIC	2	75148104	75942397	2441	312	0.19715	-0.05973	0.49895	0.0388682	0	0.24895	0.132162	0	0
AD	ATOPIC	2	75942398	76649030	2244	217	0.0488821	-0.29444	0.4223	0.00238946	0	0.21851	0.750394	0	0
AD	ATOPIC	2	77372831	78080057	2182	289	0.137795	-0.21617	0.64322	0.0189873	0	0.43404	0.404064	0	0
AD	ATOPIC	2	79900056	80737811	2406	337	0.0253993	-0.26244	0.33713	0.000645126	0	0.13275	0.852269	0	0
AD	ATOPIC	2	86867033	88547312	1577	288	-0.0555148	-0.28342	0.16373	0.0030819	0	0.08225	0.601586	0	0
AD	ATOPIC	2	88547313	91860961	1922	276	-0.0308012	-0.32391	0.2464	0.000948717	0	0.12473	0.810481	0	0
AD	ATOPIC	2	91860962	97339301	2216	282	-0.117365	-0.27561	0.03518	0.0137745	0	0.07596	0.135039	0	0
AD	ATOPIC	2	101556800	102494487	2569	286	0.11242	-0.17505	0.44059	0.0126382	0	0.19689	0.413664	0	0
AD	ATOPIC	2	103305258	105120578	4248	356	-0.0864503	-0.49527	0.24421	0.00747365	0	0.26798	0.579909	0	0
AD	ATOPIC	2	105120579	106546524	4416	384	-0.443114	-1	-0.13918	0.19635	0.01981	1	0.00533809	0	1
AD	ATOPIC	2	106546525	107412295	2756	292	0.0539777	-0.26191	0.41593	0.00291359	0	0.19327	0.709213	0	0
AD	ATOPIC	2	107412296	108417773	3023	275	-0.284472	-0.82814	0.02423	0.0809246	0	0.68582	0.0723283	0	0
AD	ATOPIC	2	118663654	119635489	2707	284	-0.0111533	-0.33793	0.31345	0.000124397	0	0.1566	0.93765	0	0
AD	ATOPIC	2	122026818	123219243	3011	283	-0.53295	-1	-0.21029	0.284036	0.04422	1	0.00173545	0	1
AD	ATOPIC	2	124730992	125741528	2851	309	0.177923	-0.1558	0.71577	0.0316565	0	0.52332	0.265327	0	0
AD	ATOPIC	2	126754028	127895644	3553	325	0.0674812	-0.0521	0.185	0.00455372	0	0.03423	0.259261	0	0
AD	ATOPIC	2	127895645	129486897	4687	352	-0.256353	-0.53655	-0.02687	0.0657168	0.00151	0.28789	0.0248292	0	0
AD	ATOPIC	2	129486898	130485398	3029	299	-0.169957	-0.69302	0.17022	0.0288855	0	0.48494	0.298054	0	0
AD	ATOPIC	2	130485399	131760638	2124	317	0.171153	-0.15673	0.69384	0.0292932	0	0.49608	0.287192	0	0
AD	ATOPIC	2	132598286	133352950	1685	247	0.398546	0.09598	1	0.158839	0.0097	1	0.0134091	1	1
AD	ATOPIC	2	134359060	135160197	2466	299	0.00879336	-0.23606	0.25146	7.73e-05	0	0.07961	0.940201	0	0
AD	ATOPIC	2	135160198	137061003	3521	258	-0.0722895	-0.51622	0.29279	0.00522577	0	0.3084	0.657288	0	0
AD	ATOPIC	2	140934532	141802664	3265	257	0.310622	0.03793	0.72351	0.0964857	0.00244	0.52378	0.0250662	1	0
AD	ATOPIC	2	142494981	143259780	2243	251	0.0603068	-0.29385	0.46696	0.00363691	0	0.25149	0.705284	0	0
AD	ATOPIC	2	143259781	144503688	3046	304	0.011967	-0.22435	0.2525	0.000143209	0	0.07897	0.915006	0	0
AD	ATOPIC	2	152497376	153999309	3988	320	0.134713	-0.22893	0.64526	0.0181475	0	0.44034	0.412119	0	0
AD	ATOPIC	2	164702313	165917788	2643	304	-0.00394457	-0.34806	0.35069	1.56e-05	0	0.19127	0.978688	0	0
AD	ATOPIC	2	168437446	169224445	2391	307	0.0739259	-0.14742	0.30039	0.00546503	0	0.09176	0.498227	0	0
AD	ATOPIC	2	169224446	170155561	2583	325	0.0689484	-0.27138	0.47765	0.00475388	0	0.27186	0.651674	0	0
AD	ATOPIC	2	170865766	171566482	2571	338	0.0282333	-0.21953	0.28322	0.000797119	0	0.08995	0.816048	0	0
AD	ATOPIC	2	174118390	174927563	2424	354	0.0477942	-0.1564	0.2453	0.00228428	0	0.06309	0.627548	0	0
AD	ATOPIC	2	179224871	180336045	2786	313	-0.0669647	-0.46642	0.27113	0.00448428	0	0.24418	0.662637	0	0
AD	ATOPIC	2	182307878	183352290	2758	289	0.354312	0.07269	0.93526	0.125537	0.00595	0.87471	0.0160837	1	0
AD	ATOPIC	2	183352291	184148655	2490	259	-0.387286	-1	-0.0449	0.149991	0.00383	1	0.0241742	0	1
AD	ATOPIC	2	184148656	184866232	2189	233	0.111641	-0.18794	0.45763	0.0124638	0	0.21142	0.435221	0	0
AD	ATOPIC	2	189882703	191051954	2750	273	-0.129734	-0.5995	0.21561	0.016831	0	0.3823	0.422241	0	0
AD	ATOPIC	2	195300251	196446299	3537	277	0.0875862	-0.16577	0.35452	0.00767134	0	0.12721	0.474124	0	0
AD	ATOPIC	2	196446300	198140350	4243	329	-0.0622462	-0.48666	0.28756	0.00387459	0	0.26889	0.690865	0	0
AD	ATOPIC	2	198140351	199654969	2690	303	-0.101229	-0.55879	0.23324	0.0102472	0	0.33299	0.511	0	0
AD	ATOPIC	2	207726595	208674588	2446	323	0.156876	-0.20302	0.7565	0.0246101	0	0.59228	0.35818	0	0
AD	ATOPIC	2	215002485	215899570	2587	283	0.264955	0.01181	0.58578	0.0702012	0.00088	0.34314	0.0392954	1	0
AD	ATOPIC	2	223353966	224123079	2585	255	0.0282816	-0.31406	0.39492	0.000799846	0	0.19524	0.850631	0	0
AD	ATOPIC	2	224123080	224938731	2382	306	-0.176149	-0.47441	0.06244	0.0310286	0	0.22672	0.147738	0	0
AD	ATOPIC	2	226242843	227557841	3035	318	-0.15422	-0.47787	0.10389	0.0237838	0	0.23051	0.217673	0	0
AD	ATOPIC	2	228812486	229764918	2682	283	0.0705308	-0.13049	0.28302	0.00497459	0	0.08049	0.482662	0	0
AD	ATOPIC	2	233352723	234115092	2373	300	0.175309	-0.03811	0.40044	0.0307334	0	0.16035	0.100489	0	0
AD	ATOPIC	2	234945578	235625789	2783	345	0.119254	-0.24014	0.57717	0.0142215	0	0.3628	0.461487	0	0
AD	ATOPIC	2	240325601	241113279	3135	372	0.144399	-0.16477	0.57318	0.020851	0	0.34555	0.333712	0	0
AD	ATOPIC	2	241113280	241910366	3257	341	-0.221007	-0.8068	0.09886	0.0488439	0	0.65467	0.155273	0	0
AD	ATOPIC	3	795747	1440048	2414	336	0.20305	-0.12745	0.75499	0.0412293	0	0.57923	0.22362	0	0
AD	ATOPIC	3	4109394	4835083	2359	334	-0.0118366	-0.26418	0.23208	0.000140106	0	0.08615	0.919787	0	0
AD	ATOPIC	3	4835084	5496182	2195	366	0.325644	0.12921	0.56274	0.106044	0.0167	0.31668	0.00150386	1	0
AD	ATOPIC	3	6421146	7529554	3927	366	-0.370737	-1	-0.08584	0.137446	0.00789	1	0.0119445	0	1
AD	ATOPIC	3	11226368	11997658	2303	318	0.216494	-0.08699	0.7968	0.0468698	0	0.64407	0.167077	0	0
AD	ATOPIC	3	16084006	17182494	3596	349	-0.0370699	-0.2879	0.20051	0.00137418	0	0.08803	0.751578	0	0
AD	ATOPIC	3	17182495	19030988	4390	331	-0.121073	-0.55557	0.20879	0.0146586	0	0.32575	0.419982	0	0
AD	ATOPIC	3	20754843	21790867	3985	340	0.44298	0.1203	1	0.196231	0.01484	1	0.00756777	1	1
AD	ATOPIC	3	28649811	29877022	4354	366	0.0629295	-0.24345	0.40006	0.00396012	0	0.17322	0.655624	0	0
AD	ATOPIC	3	32378806	33020868	2263	273	0.289167	0.08604	0.51584	0.0836176	0.0074	0.26609	0.00537127	1	0
AD	ATOPIC	3	54074845	54892586	2468	337	-0.0902807	-0.55419	0.27017	0.00815061	0	0.34984	0.579012	0	0
AD	ATOPIC	3	56954879	58557718	4144	305	-0.121357	-0.57948	0.2253	0.0147275	0	0.37301	0.456186	0	0
AD	ATOPIC	3	66702085	67454740	2613	278	0.106121	-0.1497	0.38807	0.0112616	0	0.15101	0.392341	0	0
AD	ATOPIC	3	71223282	72334704	3330	399	0.226717	0.02506	0.45645	0.0514005	0.00112	0.20835	0.0301823	1	0
AD	ATOPIC	3	73606613	74383137	2614	302	-0.125505	-0.56306	0.18826	0.0157516	0	0.32611	0.403946	0	0
AD	ATOPIC	3	74383138	75374967	2468	252	-0.0778806	-0.43935	0.22889	0.0060654	0	0.21033	0.585758	0	0
AD	ATOPIC	3	75374968	76157470	2418	224	0.0300338	-0.19527	0.25791	0.000902027	0	0.0727	0.785695	0	0
AD	ATOPIC	3	80385709	81431496	2838	245	-0.277599	-0.91858	0.05904	0.077061	0	0.84379	0.0995338	0	0
AD	ATOPIC	3	81431497	82532742	2433	265	-0.108984	-0.40077	0.14925	0.0118776	0	0.16211	0.391134	0	0
AD	ATOPIC	3	96055533	97351955	2455	252	0.142376	-0.17097	0.5502	0.0202708	0	0.31009	0.341723	0	0
AD	ATOPIC	3	104116564	104878977	2547	237	0.0485506	-0.31986	0.47144	0.00235716	0	0.26849	0.763251	0	0
AD	ATOPIC	3	107736520	108638900	2287	246	-0.26257	-0.93648	0.08249	0.0689431	0	0.89336	0.12696	0	0
AD	ATOPIC	3	117241645	118086929	2372	250	-0.342016	-1	-0.00054	0.116975	0.00152	1	0.0483213	0	1
AD	ATOPIC	3	118086930	118903053	2287	246	0.0482869	-0.27698	0.41134	0.00233163	0	0.19616	0.741598	0	0
AD	ATOPIC	3	118903054	119759983	2344	273	-0.122397	-0.40631	0.12926	0.0149811	0	0.16765	0.323236	0	0
AD	ATOPIC	3	132124019	132925967	2171	242	0.497626	0.15592	1	0.247632	0.0248	1	0.00601973	1	1
AD	ATOPIC	3	137372142	138693846	2652	306	0.0914386	-0.14363	0.33953	0.00836102	0	0.11621	0.419615	0	0
AD	ATOPIC	3	138693847	139831267	2921	316	0.0216255	-0.36305	0.43235	0.000467662	0	0.26464	0.89475	0	0
AD	ATOPIC	3	141034638	141898978	2413	302	0.08952	-0.13565	0.3354	0.00801382	0	0.11322	0.428969	0	0
AD	ATOPIC	3	149998412	151131307	2879	350	0.0896257	-0.19256	0.43321	0.00803277	0	0.20223	0.506346	0	0
AD	ATOPIC	3	151131308	151904021	2382	262	0.105527	-0.08683	0.3066	0.0111359	0	0.09426	0.273065	0	0
AD	ATOPIC	3	151904022	153406718	4062	338	-0.0549298	-0.45547	0.29555	0.00301728	0	0.24707	0.713577	0	0
AD	ATOPIC	3	153406719	155046423	4455	329	0.0578383	-0.29796	0.46448	0.00334526	0	0.25972	0.711162	0	0
AD	ATOPIC	3	170174579	171134849	2357	311	-0.0535699	-0.43002	0.26384	0.00286974	0	0.20344	0.720323	0	0
AD	ATOPIC	3	172004761	173415591	3724	385	-0.00620659	-0.39927	0.38947	3.85e-05	0	0.25831	0.969321	0	0
AD	ATOPIC	3	173415592	174684707	3657	343	-0.257044	-0.83475	0.04747	0.0660715	0	0.7017	0.0990101	0	0
AD	ATOPIC	3	176931164	178110322	3045	356	0.0958373	-0.2476	0.55905	0.00918479	0	0.33253	0.547621	0	0
AD	ATOPIC	3	185709997	186602045	2511	365	0.150143	-0.12099	0.50466	0.022543	0	0.2559	0.272499	0	0
AD	ATOPIC	3	190591294	191229357	2352	238	0.0294029	-0.2636	0.337	0.000864529	0	0.13564	0.825333	0	0
AD	ATOPIC	3	195196790	195710290	1485	298	0.0781531	-0.11063	0.26851	0.00610791	0	0.07219	0.399035	0	0
AD	ATOPIC	3	195710291	196383152	2169	311	-0.0878415	-0.50592	0.24073	0.00771614	0	0.27612	0.559943	0	0
AD	ATOPIC	3	196383153	197147990	2386	323	-0.0406702	-0.3395	0.2392	0.00165406	0	0.12592	0.75311	0	0
AD	ATOPIC	3	197147991	197962380	2032	287	-0.0887979	-0.56062	0.2839	0.00788508	0	0.35851	0.591642	0	0
AD	ATOPIC	4	10227	812415	2388	252	-0.115968	-0.5591	0.22723	0.0134486	0	0.34835	0.45222	0	0
AD	ATOPIC	4	812416	1529267	2405	269	0.0304182	-0.24382	0.32051	0.000925264	0	0.11661	0.817642	0	0
AD	ATOPIC	4	1529268	2468935	2606	323	-0.00523194	-0.18785	0.17129	2.74e-05	0	0.04239	0.953551	0	0
AD	ATOPIC	4	2468936	3549229	3194	319	-0.154809	-0.37735	0.05142	0.0239658	0	0.14239	0.133993	0	0
AD	ATOPIC	4	3549230	4266178	3408	358	0.000740191	-0.36581	0.36004	5.48e-07	0	0.20782	0.996171	0	0
AD	ATOPIC	4	7726035	8309826	2499	350	0.110106	-0.22916	0.58217	0.0121234	0	0.37148	0.490915	0	0
AD	ATOPIC	4	8309827	8882616	2544	327	0.206912	-0.04484	0.55712	0.0428126	0	0.31039	0.109573	0	0
AD	ATOPIC	4	8882617	9482867	1889	240	-0.0305761	-0.21668	0.15701	0.000934896	0	0.05021	0.74335	0	0
AD	ATOPIC	4	9482868	9916156	2080	206	0.0720929	-0.31549	0.52553	0.00519739	0	0.32738	0.664832	0	0
AD	ATOPIC	4	10370667	11050119	2340	273	-0.074659	-0.48742	0.27998	0.00557397	0	0.26996	0.638387	0	0
AD	ATOPIC	4	13127577	14395886	4240	361	-0.0576052	-0.35967	0.22265	0.00331836	0	0.14098	0.663562	0	0
AD	ATOPIC	4	14395887	14967147	2113	238	0.134064	-0.21402	0.60264	0.0179731	0	0.37714	0.408171	0	0
AD	ATOPIC	4	23858351	24764724	2614	347	-0.0576441	-0.46467	0.30012	0.00332285	0	0.25945	0.719132	0	0
AD	ATOPIC	4	32746821	33640822	2305	233	-0.0838216	-0.28237	0.10338	0.00702606	0	0.08015	0.384613	0	0
AD	ATOPIC	4	35993839	36671801	2253	225	0.0507741	-0.22364	0.35358	0.00257801	0	0.13388	0.7022	0	0
AD	ATOPIC	4	37880861	38984838	3950	359	0.215457	0.04872	0.39712	0.0464218	0.00256	0.15771	0.0115591	1	0
AD	ATOPIC	4	38984839	39820061	2220	259	-0.0935833	-0.44857	0.22102	0.00875784	0	0.21113	0.525483	0	0
AD	ATOPIC	4	39820062	40590541	2365	326	-0.105181	-0.29782	0.07907	0.0110631	0	0.08869	0.257219	0	0
AD	ATOPIC	4	40590542	41360937	2426	287	0.0136909	-0.3534	0.40864	0.000187441	0	0.24085	0.930338	0	0
AD	ATOPIC	4	41360938	42189251	2331	259	0.0496888	-0.27241	0.42177	0.00246897	0	0.20104	0.73193	0	0
AD	ATOPIC	4	57103101	58011085	3031	308	0.111669	-0.12936	0.3913	0.0124699	0	0.15333	0.34586	0	0
AD	ATOPIC	4	58011086	58940256	3228	314	-0.343355	-0.88812	-0.06886	0.117893	0.00516	0.78876	0.0147705	0	0
AD	ATOPIC	4	63337955	64117431	2798	263	0.238054	-0.03731	0.61645	0.0566699	0	0.38185	0.0886675	0	0
AD	ATOPIC	4	65563101	66597446	3341	285	-0.270485	-0.78302	0.03219	0.0731619	0	0.61577	0.074104	0	0
AD	ATOPIC	4	68742860	69603368	1827	244	0.171355	-0.02302	0.38027	0.0293626	0	0.14461	0.0829815	0	0
AD	ATOPIC	4	76497359	78045637	4540	342	0.208538	-0.06457	0.59946	0.0434882	0	0.36065	0.128673	0	0
AD	ATOPIC	4	85437806	86931670	3823	299	0.0310253	-0.29461	0.3801	0.00096257	0	0.18795	0.825851	0	0
AD	ATOPIC	4	88502718	89244554	2416	270	-0.180728	-0.56521	0.09835	0.0326625	0	0.32152	0.196771	0	0
AD	ATOPIC	4	90236972	91309863	3224	261	0.059241	-0.22523	0.37077	0.0035095	0	0.14475	0.654644	0	0
AD	ATOPIC	4	100333335	101132995	2416	263	-0.00386379	-0.2764	0.27744	1.49e-05	0	0.11101	0.976138	0	0
AD	ATOPIC	4	108131207	109122458	2460	286	0.152031	-0.178	0.63531	0.0231135	0	0.42399	0.328144	0	0
AD	ATOPIC	4	109978983	111733579	4728	371	-0.102091	-0.45563	0.19179	0.0104226	0	0.215	0.466443	0	0
AD	ATOPIC	4	111733580	112830229	2649	284	0.115257	-0.11873	0.36632	0.0132841	0	0.13457	0.321341	0	0
AD	ATOPIC	4	115306150	116204703	2779	236	-0.196564	-0.44609	0.0312	0.0386372	0	0.199	0.0832907	0	0
AD	ATOPIC	4	119138098	119927262	2081	207	-0.168673	-0.49898	0.10282	0.0284505	0	0.24898	0.215422	0	0
AD	ATOPIC	4	121981244	122655434	2502	268	0.0795777	-0.18212	0.36401	0.00633261	0	0.13588	0.522507	0	0
AD	ATOPIC	4	128321877	129625376	2736	296	-0.175544	-0.55784	0.10708	0.0308158	0	0.31317	0.207657	0	0
AD	ATOPIC	4	146174872	147161042	2516	332	-0.108537	-0.53776	0.22257	0.0117803	0	0.29729	0.485828	0	0
AD	ATOPIC	4	147161043	148462208	3013	287	0.134167	-0.14759	0.50637	0.0180008	0	0.26346	0.331493	0	0
AD	ATOPIC	4	152162099	153520883	3505	325	-0.48205	-1	-0.17228	0.232372	0.02968	1	0.00326685	0	1
AD	ATOPIC	4	163245542	163937103	2366	232	0.0890596	-0.24296	0.50882	0.00793161	0	0.27731	0.561078	0	0
AD	ATOPIC	4	174470207	175295842	2340	330	-0.0509422	-0.31294	0.19839	0.00259511	0	0.1034	0.664497	0	0
AD	ATOPIC	4	179932392	180540877	2524	261	0.281454	-0.03944	0.80832	0.0792166	0	0.65898	0.0845668	0	0
AD	ATOPIC	4	181122434	182065646	3506	373	-0.0273332	-0.32529	0.25442	0.000747106	0	0.13341	0.831557	0	0
AD	ATOPIC	4	183603893	184338584	2353	326	0.101877	-0.18456	0.4325	0.0103789	0	0.19387	0.461566	0	0
AD	ATOPIC	4	185483263	186232882	2745	330	-0.335757	-1	-0.00878	0.112733	0.00188	1	0.0482467	0	1
AD	ATOPIC	4	189153280	189899573	4056	337	-0.0121878	-0.27288	0.24507	0.000148542	0	0.0921	0.920672	0	0
AD	ATOPIC	4	189899574	191043880	3169	327	-0.112949	-0.40294	0.13926	0.0127576	0	0.16422	0.358873	0	0
AD	ATOPIC	5	598321	1206609	2071	327	0.132034	-0.04653	0.3204	0.0174331	0	0.10266	0.149647	0	0
AD	ATOPIC	5	3677596	4636542	2798	352	0.123201	-0.17264	0.51843	0.0151784	0	0.27467	0.386963	0	0
AD	ATOPIC	5	5828695	6936733	4167	370	0.151353	-0.18344	0.63026	0.0229076	0	0.41208	0.327677	0	0
AD	ATOPIC	5	13608148	14910295	3545	361	0.265684	0.07197	0.48315	0.0705879	0.00538	0.23343	0.00804212	1	0
AD	ATOPIC	5	21211400	22149042	2153	256	-0.26852	-0.87341	0.03234	0.0721028	0	0.76284	0.0763073	0	0
AD	ATOPIC	5	33971057	35157146	3630	321	-0.0198943	-0.42868	0.37491	0.000395782	0	0.2611	0.903482	0	0
AD	ATOPIC	5	51203266	52139773	2687	263	-0.0987793	-0.55455	0.27078	0.00975735	0	0.3418	0.554056	0	0
AD	ATOPIC	5	52139774	52837225	2300	249	-0.243526	-0.63231	0.02668	0.059305	0	0.39981	0.0813125	0	0
AD	ATOPIC	5	57895013	58721458	2607	296	-0.179153	-0.63283	0.13153	0.0320959	0	0.40692	0.240579	0	0
AD	ATOPIC	5	59868568	60930753	2364	230	0.0681757	-0.22183	0.40027	0.00464793	0	0.1754	0.618539	0	0
AD	ATOPIC	5	60930754	62180368	2913	308	0.0558968	-0.31696	0.48019	0.00312446	0	0.27289	0.726158	0	0
AD	ATOPIC	5	64438519	65606870	2744	289	0.238421	-0.09621	0.90947	0.0568444	0	0.82895	0.159802	0	0
AD	ATOPIC	5	73314062	74245354	2623	345	0.244381	-0.00881	0.5932	0.0597219	0	0.35188	0.0515045	0	0
AD	ATOPIC	5	74245355	75239302	2542	210	0.184821	-0.12368	0.64125	0.0341588	0	0.41566	0.221245	0	0
AD	ATOPIC	5	75239303	75959515	2264	311	-0.126463	-0.41886	0.12192	0.0159928	0	0.1765	0.305022	0	0
AD	ATOPIC	5	97316602	98567769	3097	279	-0.440013	-1	-0.16622	0.193611	0.02763	1	0.00208309	0	1
AD	ATOPIC	5	100594082	101575367	3179	237	0.086329	-0.31227	0.58268	0.0074527	0	0.39968	0.628436	0	0
AD	ATOPIC	5	102903986	103788460	2435	329	0.140296	-0.14732	0.52654	0.0196829	0	0.28463	0.316329	0	0
AD	ATOPIC	5	106389389	107265911	2500	326	0.0275209	-0.27694	0.34066	0.000757402	0	0.14563	0.83661	0	0
AD	ATOPIC	5	120371858	120960737	2373	230	0.593119	0.26866	1	0.35179	0.07218	1	0.000414794	1	1
AD	ATOPIC	5	120960738	122005291	2517	316	0.0565606	-0.26888	0.41353	0.0031991	0	0.20023	0.692915	0	0
AD	ATOPIC	5	124109486	125131720	3319	348	0.00864048	-0.32024	0.32856	7.47e-05	0	0.15056	0.950924	0	0
AD	ATOPIC	5	125131721	126054697	3143	292	0.0556692	-0.27647	0.43942	0.00309906	0	0.21503	0.711307	0	0
AD	ATOPIC	5	126992837	128067414	2542	259	0.18209	-0.07776	0.52348	0.0331569	0	0.27459	0.170637	0	0
AD	ATOPIC	5	128067415	128734905	2577	218	0.0508695	-0.26919	0.38863	0.00258771	0	0.16816	0.724727	0	0
AD	ATOPIC	5	136949854	139408116	4019	367	0.109024	-0.18952	0.4665	0.0118863	0	0.22202	0.428209	0	0
AD	ATOPIC	5	141253831	142532956	3836	386	0.336867	0.01824	1	0.113479	0.00161	1	0.0437928	1	1
AD	ATOPIC	5	149850204	150981934	3586	338	0.0362173	-0.29889	0.37788	0.0013117	0	0.18354	0.800552	0	0
AD	ATOPIC	5	151892618	152878627	2667	253	0.180428	-0.10627	0.53942	0.0325541	0	0.29416	0.194893	0	0
AD	ATOPIC	5	153734495	154599750	2413	311	-0.0617126	-0.36194	0.20774	0.00380844	0	0.14041	0.632491	0	0
AD	ATOPIC	5	156345452	157191081	2754	253	0.150688	-0.11627	0.47292	0.0227068	0	0.22415	0.241148	0	0
AD	ATOPIC	5	157191082	158484775	3516	328	0.174697	-0.1146	0.58334	0.0305192	0	0.3431	0.225842	0	0
AD	ATOPIC	5	159663734	160519049	2560	318	0.0783088	-0.29054	0.53992	0.00613227	0	0.32518	0.626981	0	0
AD	ATOPIC	5	161478178	162386027	2275	284	0.0496342	-0.20617	0.31871	0.00246355	0	0.10592	0.684407	0	0
AD	ATOPIC	5	172285683	173606995	4126	394	0.160326	-0.12406	0.5741	0.0257045	0	0.33015	0.259867	0	0
AD	ATOPIC	5	174662886	176180301	3518	400	-0.00985213	-0.41983	0.40864	9.71e-05	0	0.26464	0.953333	0	0
AD	ATOPIC	5	176180302	177659902	3278	346	-0.174208	-0.41427	0.04382	0.0303484	0	0.17162	0.112783	0	0
AD	ATOPIC	6	16566883	17391994	2346	336	0.0654938	-0.19038	0.34705	0.00428944	0	0.12493	0.603708	0	0
AD	ATOPIC	6	18208677	18775022	2214	187	-0.409164	-0.7794	-0.13862	0.167415	0.01928	0.60747	0.00384379	0	0
AD	ATOPIC	6	20418021	21295864	2633	292	-0.0800582	-0.33644	0.16189	0.00640931	0	0.11405	0.493038	0	0
AD	ATOPIC	6	29833844	30070717	470	84	-0.0293487	-0.47948	0.41148	0.000861347	0	0.29924	0.882073	0	0
AD	ATOPIC	6	30715007	31106493	689	157	-0.104264	-0.38255	0.15327	0.010871	0	0.1466	0.42072	0	0
AD	ATOPIC	6	31106494	31250556	469	54	-0.204348	-1	0.43349	0.0417581	0	1	0.472704	0	1
AD	ATOPIC	6	31320269	31427209	518	83	-0.231376	-0.51812	0.04272	0.0535348	0	0.26845	0.0986008	0	0
AD	ATOPIC	6	31427210	32208901	1068	197	0.0447281	-0.13544	0.22938	0.0020006	0	0.05289	0.62537	0	0
AD	ATOPIC	6	32208902	32454577	609	66	0.0667771	-0.70177	0.90142	0.00445919	0	1	0.833506	0	0
AD	ATOPIC	6	32454578	32539567	1742	298	0.442233	0.32496	0.5613	0.19557	0.1056	0.31506	4.42e-12	1	0
AD	ATOPIC	6	32539568	32586784	1062	204	0.193947	0.04201	0.34475	0.0376155	0.00189	0.11886	0.0117689	1	0
AD	ATOPIC	6	32586785	32629239	1328	214	0.118021	-0.10619	0.33825	0.0139291	0	0.11443	0.283684	0	0
AD	ATOPIC	6	32629240	32682213	466	121	0.270649	0.1044	0.4385	0.0732508	0.0109	0.19228	0.00212201	1	0
AD	ATOPIC	6	32682214	32897998	592	89	-0.0418259	-0.40587	0.306	0.0017494	0	0.18924	0.801785	0	0
AD	ATOPIC	6	32897999	33194975	547	125	0.140744	-0.19353	0.54166	0.019809	0	0.29716	0.381952	0	0
AD	ATOPIC	6	33194976	33864262	2224	241	0.077537	-0.18117	0.35837	0.00601198	0	0.13147	0.541745	0	0
AD	ATOPIC	6	33864263	34979270	3467	310	-0.0482753	-0.4506	0.33828	0.00233051	0	0.24966	0.765154	0	0
AD	ATOPIC	6	38688721	39785907	3800	338	0.0560794	-0.25364	0.39255	0.0031449	0	0.17725	0.687424	0	0
AD	ATOPIC	6	39785908	40778401	3421	332	0.123628	-0.08722	0.34449	0.0152839	0	0.11874	0.243575	0	0
AD	ATOPIC	6	40778402	42103738	3979	385	-0.20798	-0.6038	0.05505	0.0432559	0	0.36573	0.118252	0	0
AD	ATOPIC	6	46430702	47313443	2522	309	-0.23995	-0.67097	0.03885	0.0575762	0	0.4502	0.0928298	0	0
AD	ATOPIC	6	47313444	48393981	3131	280	0.127248	-0.10587	0.39039	0.0161922	0	0.15241	0.275187	0	0
AD	ATOPIC	6	56200986	57316157	2153	275	-0.0170773	-0.21938	0.18722	0.000291635	0	0.05612	0.865031	0	0
AD	ATOPIC	6	58141890	61883560	1820	133	-0.033193	-0.37792	0.28098	0.00110177	0	0.16624	0.826162	0	0
AD	ATOPIC	6	61883561	62693128	3145	156	-0.121629	-0.53445	0.21443	0.0147935	0	0.29319	0.439623	0	0
AD	ATOPIC	6	65759862	66445495	2266	201	-0.336799	-1	0.01855	0.113434	0	1	0.0664455	0	1
AD	ATOPIC	6	67036788	67559694	2185	212	0.22535	-0.14164	0.78383	0.0507825	0	0.61606	0.200926	0	0
AD	ATOPIC	6	67559695	68547494	4010	243	-0.00250265	-0.42562	0.4284	6.26e-06	0	0.30867	0.988477	0	0
AD	ATOPIC	6	70363349	71610787	3649	317	0.11398	-0.08743	0.32965	0.0129913	0	0.10867	0.260435	0	0
AD	ATOPIC	6	79859904	80693927	2492	281	0.130912	-0.23198	0.64449	0.0171381	0	0.43512	0.441579	0	0
AD	ATOPIC	6	83571954	85038134	2998	308	0.278117	0.07331	0.52802	0.0773491	0.00566	0.27881	0.00896052	1	0
AD	ATOPIC	6	85837204	86818669	2631	220	-0.0461582	-0.27508	0.18311	0.00213058	0	0.07949	0.672939	0	0
AD	ATOPIC	6	89974268	91097024	2685	343	0.197855	-0.11854	0.70583	0.0391464	0	0.50574	0.201046	0	0
AD	ATOPIC	6	95176338	96480153	3498	303	0.00613946	-0.40824	0.411	3.77e-05	0	0.2843	0.970702	0	0
AD	ATOPIC	6	101793543	102637706	1729	182	0.201725	-0.167	0.69427	0.0406929	0	0.48737	0.243624	0	0
AD	ATOPIC	6	104951345	106053915	1858	195	0.0970116	-0.3297	0.59253	0.00941125	0	0.40253	0.611688	0	0
AD	ATOPIC	6	106053916	107309327	3283	296	-0.0470266	-0.32617	0.21648	0.0022115	0	0.11551	0.712163	0	0
AD	ATOPIC	6	113705004	115062811	3102	319	-0.0874042	-0.53464	0.25149	0.00763949	0	0.30685	0.584667	0	0
AD	ATOPIC	6	118529072	119451294	2636	216	-0.23311	-0.64254	0.05585	0.0543404	0	0.41378	0.10716	0	0
AD	ATOPIC	6	122929291	123854857	2851	310	-0.0262751	-0.42231	0.33045	0.000690381	0	0.24276	0.864758	0	0
AD	ATOPIC	6	130550138	131457164	3196	256	0.184562	-0.13861	0.68899	0.0340631	0	0.48223	0.249603	0	0
AD	ATOPIC	6	131457165	132890694	3384	334	0.272654	0.01353	0.66079	0.07434	0.0014	0.43664	0.0406435	1	0
AD	ATOPIC	6	134313644	135544083	2391	241	0.389753	0.06197	0.87799	0.151907	0.00557	0.77087	0.0232477	1	0
AD	ATOPIC	6	137553213	138825721	2700	243	0.387687	0.13138	0.69831	0.150301	0.01726	0.48764	0.00352167	1	0
AD	ATOPIC	6	138825722	139716713	1958	207	0.0964862	-0.26601	0.51445	0.00930958	0	0.28517	0.570988	0	0
AD	ATOPIC	6	143083348	144791455	2888	268	0.278942	-0.11689	0.95385	0.0778085	0	0.91414	0.16601	0	0
AD	ATOPIC	6	144791456	145778282	2917	259	0.208376	0.0104	0.42952	0.0434204	0.00069	0.18449	0.0438782	1	0
AD	ATOPIC	6	145778283	147015882	2584	245	-0.0296365	-0.47802	0.38245	0.000878321	0	0.3093	0.864613	0	0
AD	ATOPIC	6	151629955	152376499	2391	298	0.130914	-0.17095	0.5264	0.0171384	0	0.28794	0.365895	0	0
AD	ATOPIC	6	153082362	153791461	2216	261	-0.0988135	-0.35617	0.148	0.00976411	0	0.12834	0.41312	0	0
AD	ATOPIC	6	161371015	162254229	2600	316	0.0615003	-0.20639	0.3444	0.00378229	0	0.12473	0.625358	0	0
AD	ATOPIC	7	15064	617319	2489	359	-0.235335	-0.77873	0.04146	0.0553827	0	0.60796	0.0992846	0	0
AD	ATOPIC	7	617320	1366972	3313	322	-0.156244	-0.56737	0.14426	0.0244123	0	0.3238	0.275229	0	0
AD	ATOPIC	7	6716906	7167610	2138	275	-0.114459	-0.40669	0.14109	0.0131008	0	0.16621	0.364773	0	0
AD	ATOPIC	7	7167611	7926500	3046	317	-0.0387112	-0.36505	0.257	0.00149856	0	0.15138	0.778186	0	0
AD	ATOPIC	7	7926501	8718351	3045	345	0.00149582	-0.18417	0.18825	2.24e-06	0	0.04599	0.987151	0	0
AD	ATOPIC	7	8718352	9225106	2346	324	0.0817518	-0.21714	0.41772	0.00668336	0	0.18388	0.550964	0	0
AD	ATOPIC	7	11232448	11855413	2437	321	-0.186794	-0.71829	0.16394	0.034892	0	0.53771	0.259339	0	0
AD	ATOPIC	7	11855414	12694915	3838	274	0.160608	-0.18968	0.73584	0.025795	0	0.55757	0.3425	0	0
AD	ATOPIC	7	13213542	13676747	2177	224	-0.258059	-0.64232	0.01897	0.0665943	0	0.41257	0.0608817	0	0
AD	ATOPIC	7	15013695	15877564	2751	331	-0.0410131	-0.53045	0.38477	0.00168207	0	0.3597	0.817329	0	0
AD	ATOPIC	7	20122180	21390644	4221	372	0.0879488	-0.15851	0.37456	0.00773499	0	0.14403	0.464293	0	0
AD	ATOPIC	7	23106681	24151099	2841	286	-0.0934489	-0.29478	0.10533	0.00873269	0	0.08689	0.341629	0	0
AD	ATOPIC	7	24894120	25671575	2642	340	-0.452108	-1	-0.15183	0.204402	0.02307	1	0.00377765	0	1
AD	ATOPIC	7	28890887	30175113	4185	366	0.266296	-0.02883	0.80532	0.0709136	0	0.64853	0.0721964	0	0
AD	ATOPIC	7	32460229	33159277	2152	182	-0.0261903	-0.42012	0.35893	0.00068593	0	0.23715	0.87233	0	0
AD	ATOPIC	7	36507691	37981936	4683	389	0.239114	-0.06287	0.77063	0.0571755	0	0.59543	0.115281	0	0
AD	ATOPIC	7	42494807	43448815	2910	299	-0.250865	-0.8705	0.08511	0.0629333	0	0.76055	0.136561	0	0
AD	ATOPIC	7	47253455	48363585	3545	357	-0.0397224	-0.35187	0.24855	0.00157787	0	0.14591	0.758617	0	0
AD	ATOPIC	7	49632427	50894508	3752	326	0.0484059	-0.30973	0.45585	0.00234313	0	0.24912	0.758252	0	0
AD	ATOPIC	7	51951648	52635123	2999	229	0.0203885	-0.33973	0.38296	0.000415691	0	0.19389	0.893795	0	0
AD	ATOPIC	7	54550501	55161394	2383	233	0.00499133	-0.23864	0.24727	2.49e-05	0	0.07932	0.966476	0	0
AD	ATOPIC	7	57383658	61969717	1649	151	0.203638	0.02406	0.39807	0.0414685	0.00111	0.15846	0.0308484	1	0
AD	ATOPIC	7	64216136	65294277	2324	183	-0.0693729	-0.24619	0.10713	0.0048126	0	0.06078	0.434145	0	0
AD	ATOPIC	7	66914876	67474722	2317	237	-0.102945	-0.60272	0.27721	0.0105976	0	0.40393	0.549769	0	0
AD	ATOPIC	7	92530166	93691725	2797	335	0.120699	-0.18684	0.53487	0.0145684	0	0.29765	0.411725	0	0
AD	ATOPIC	7	98173565	99465540	3026	298	0.14577	-0.13238	0.52915	0.021249	0	0.28149	0.29136	0	0
AD	ATOPIC	7	99465541	100849307	2823	326	-0.142767	-0.60516	0.19697	0.0203824	0	0.37847	0.367144	0	0
AD	ATOPIC	7	105312564	106399739	3342	381	-0.0183454	-0.26183	0.21573	0.000336554	0	0.07894	0.871557	0	0
AD	ATOPIC	7	119568237	121042050	3182	296	-0.253292	-0.96272	0.08728	0.064157	0	0.93364	0.136403	0	0
AD	ATOPIC	7	121042051	121946052	2317	256	0.0540328	-0.34851	0.51794	0.00291954	0	0.33047	0.759914	0	0
AD	ATOPIC	7	128779174	130418704	4087	364	-0.199687	-0.74828	0.13447	0.039875	0	0.57414	0.218381	0	0
AD	ATOPIC	7	133807217	134943221	3412	288	0.272787	-0.07125	1	0.074413	0	1	0.113461	0	1
AD	ATOPIC	7	136113468	137657459	3938	357	0.0147375	-0.25073	0.28962	0.000217194	0	0.10668	0.904897	0	0
AD	ATOPIC	7	137657460	138755107	3386	387	-0.00944836	-0.29244	0.27629	8.93e-05	0	0.11198	0.942073	0	0
AD	ATOPIC	7	149843000	150897818	3289	338	-0.00127262	-0.20449	0.21074	1.62e-06	0	0.05765	0.990028	0	0
AD	ATOPIC	7	156344387	157199331	3277	308	0.0630764	-0.13469	0.26916	0.00397864	0	0.07291	0.53063	0	0
AD	ATOPIC	7	157199332	158031247	3424	372	0.367043	0.06594	0.9896	0.134721	0.00526	0.97932	0.0190684	1	0
AD	ATOPIC	8	1161825	1628039	2235	314	0.306384	0.03844	0.75738	0.0938711	0.00242	0.5751	0.0264389	1	0
AD	ATOPIC	8	1628040	2070902	2080	360	0.0274965	-0.25305	0.32187	0.000756058	0	0.13083	0.831102	0	0
AD	ATOPIC	8	2070903	2396122	1731	236	-0.236079	-0.59583	0.031	0.0557331	0	0.35502	0.0772888	0	0
AD	ATOPIC	8	6019164	6663427	3684	371	0.00368689	-0.3089	0.32673	1.36e-05	0	0.14649	0.9788	0	0
AD	ATOPIC	8	6663428	8064600	1996	347	0.0331651	-0.28123	0.37419	0.00109992	0	0.16347	0.817886	0	0
AD	ATOPIC	8	8064601	8589770	2104	272	0.381489	0.08603	1	0.145534	0.00762	1	0.0127434	1	1
AD	ATOPIC	8	9835864	10478851	2576	317	-0.166408	-0.67213	0.15969	0.0276916	0	0.45476	0.285629	0	0
AD	ATOPIC	8	12296850	12947935	2085	270	-0.0986626	-0.34466	0.12367	0.0097343	0	0.11993	0.375766	0	0
AD	ATOPIC	8	18668610	19488888	3280	365	0.368113	0.04509	1	0.135507	0.00357	1	0.0293277	1	1
AD	ATOPIC	8	19488889	20135628	2417	313	-0.0384468	-0.42554	0.33175	0.00147816	0	0.23346	0.80773	0	0
AD	ATOPIC	8	20135629	20812107	2425	288	0.0400986	-0.28185	0.39337	0.0016079	0	0.18296	0.781791	0	0
AD	ATOPIC	8	20812108	21650453	2937	353	0.231375	-0.06903	0.75578	0.0535346	0	0.5712	0.126079	0	0
AD	ATOPIC	8	23788495	24863243	2893	309	-0.156258	-0.61562	0.15583	0.0244166	0	0.39334	0.303094	0	0
AD	ATOPIC	8	25859278	26679135	3130	312	0.148737	-0.06113	0.36696	0.0221227	0	0.13466	0.149481	0	0
AD	ATOPIC	8	26679136	27406511	2733	259	-0.0475411	-0.23193	0.12897	0.00226016	0	0.05454	0.596812	0	0
AD	ATOPIC	8	27406512	28344176	2849	337	0.23225	0.09779	0.37396	0.0539402	0.00956	0.13985	0.000749675	1	0
AD	ATOPIC	8	28344177	29744540	3400	369	0.282964	0.07186	0.54519	0.0800688	0.00549	0.29723	0.00832012	1	0
AD	ATOPIC	8	31134787	32454962	4331	315	0.334005	-0.00344	1	0.11156	0	1	0.053161	0	1
AD	ATOPIC	8	41725003	43825633	4510	325	-0.341858	-1	-0.00551	0.116867	0.00179	1	0.0502848	0	1
AD	ATOPIC	8	51461456	52326236	2624	239	0.261878	0.0133	0.64644	0.0685802	0.00125	0.41789	0.0496345	1	0
AD	ATOPIC	8	55275355	56346878	3113	305	0.232334	-0.02207	0.61159	0.053979	0	0.37404	0.0786798	0	0
AD	ATOPIC	8	58675118	59555977	2735	298	0.121552	-0.25282	0.64222	0.0147748	0	0.44027	0.47651	0	0
AD	ATOPIC	8	59555978	60476248	2382	305	0.202107	-0.04729	0.53668	0.0408471	0	0.28802	0.107551	0	0
AD	ATOPIC	8	66018205	66960438	2655	262	0.0217959	-0.34863	0.40725	0.00047506	0	0.22761	0.888767	0	0
AD	ATOPIC	8	70004666	70872088	2357	334	0.293318	0.07578	0.57936	0.0860357	0.00594	0.33566	0.0101674	1	0
AD	ATOPIC	8	72013185	72917489	2586	338	-0.156387	-0.47745	0.10098	0.0244568	0	0.22853	0.220448	0	0
AD	ATOPIC	8	73838028	75011699	3180	338	0.218823	-0.11898	0.84804	0.0478833	0	0.72065	0.18384	0	0
AD	ATOPIC	8	82878770	83730337	2658	235	-0.00844929	-0.33862	0.33334	7.14e-05	0	0.15881	0.954234	0	0
AD	ATOPIC	8	86251871	87563145	2372	264	0.0561149	-0.20889	0.3494	0.00314888	0	0.12841	0.66243	0	0
AD	ATOPIC	8	94999067	96175630	3544	303	0.187377	-0.08891	0.57226	0.0351103	0	0.32748	0.173384	0	0
AD	ATOPIC	8	103716054	104467845	2326	296	0.130378	-0.16015	0.5144	0.0169984	0	0.27003	0.355714	0	0
AD	ATOPIC	8	105370131	106500950	2832	315	0.0639868	-0.31715	0.51645	0.00409431	0	0.31967	0.696629	0	0
AD	ATOPIC	8	107787164	108647463	2519	266	0.158535	-0.15251	0.64561	0.0251334	0	0.42246	0.299524	0	0
AD	ATOPIC	8	118300069	119423298	2913	335	-0.171727	-0.61682	0.12216	0.0294902	0	0.38134	0.248465	0	0
AD	ATOPIC	8	119423299	120216587	2402	273	-0.107095	-0.38347	0.1412	0.0114693	0	0.14846	0.374324	0	0
AD	ATOPIC	8	122622805	124001019	3317	370	0.101637	-0.22061	0.51089	0.0103302	0	0.27835	0.497142	0	0
AD	ATOPIC	8	125453323	126766827	3823	379	-0.0780748	-0.34568	0.16698	0.00609568	0	0.12143	0.509454	0	0
AD	ATOPIC	8	133461552	134509448	3362	364	-0.0701936	-0.3309	0.17182	0.00492713	0	0.11184	0.547854	0	0
AD	ATOPIC	8	143611462	144934288	4379	359	-0.134433	-0.33818	0.0593	0.0180723	0	0.11436	0.171418	0	0
AD	ATOPIC	8	144934289	146303787	2494	341	0.349025	0.06962	0.86557	0.121818	0.00576	0.74922	0.0126067	1	0
AD	ATOPIC	9	10469	653661	2144	281	0.115866	-0.16988	0.45411	0.0134249	0	0.2079	0.39548	0	0
AD	ATOPIC	9	653662	1103598	2165	307	0.0170821	-0.25484	0.30127	0.000291797	0	0.1146	0.892897	0	0
AD	ATOPIC	9	4025356	4596614	2303	354	0.00586979	-0.249	0.26767	3.45e-05	0	0.08724	0.961767	0	0
AD	ATOPIC	9	4596615	5437591	2651	328	-0.120298	-0.31954	0.06882	0.0144717	0	0.10211	0.198211	0	0
AD	ATOPIC	9	9920259	10675474	3144	330	-0.24553	-0.67389	0.03513	0.0602849	0	0.45545	0.0887359	0	0
AD	ATOPIC	9	14244748	14902924	2358	367	0.0513529	-0.17698	0.2846	0.00263712	0	0.08448	0.64111	0	0
AD	ATOPIC	9	16658378	17392382	2913	249	0.123208	-0.18236	0.49863	0.0151801	0	0.25188	0.393447	0	0
AD	ATOPIC	9	18754197	19463292	2377	301	0.114433	-0.13657	0.41245	0.013095	0	0.17092	0.364419	0	0
AD	ATOPIC	9	20483881	21674032	3365	328	-0.0490188	-0.4043	0.26546	0.00240284	0	0.19073	0.733299	0	0
AD	ATOPIC	9	23859375	24757729	2469	298	0.101344	-0.23625	0.54536	0.0102707	0	0.32088	0.520377	0	0
AD	ATOPIC	9	25957607	26747214	2367	291	-0.124864	-0.41052	0.11756	0.0155911	0	0.16908	0.304511	0	0
AD	ATOPIC	9	32253284	33194892	2869	309	-0.0306292	-0.36928	0.28518	0.000938151	0	0.16652	0.829822	0	0
AD	ATOPIC	9	36749274	37687112	2496	322	-0.2006	-0.79667	0.15424	0.0402403	0	0.64199	0.244211	0	0
AD	ATOPIC	9	38822978	43903829	397	90	-0.21392	-0.53472	0.07112	0.0457619	0	0.28592	0.134659	0	0
AD	ATOPIC	9	66673059	70939677	212	57	0.0240033	-0.43821	0.48156	0.00057616	0	0.31651	0.905539	0	0
AD	ATOPIC	9	82601466	83455502	2937	207	-0.023164	-0.49726	0.41192	0.000536571	0	0.35519	0.898234	0	0
AD	ATOPIC	9	85135752	86769886	3941	328	-0.0708249	-0.34671	0.18717	0.00501617	0	0.12334	0.583787	0	0
AD	ATOPIC	9	87815450	89171796	2766	281	-0.0294726	-0.3014	0.22599	0.000868636	0	0.09891	0.813715	0	0
AD	ATOPIC	9	89171797	90135154	2644	280	0.0279925	-0.29971	0.37407	0.00078358	0	0.1788	0.848329	0	0
AD	ATOPIC	9	90135155	90890979	2478	287	0.0376715	-0.20481	0.28935	0.00141914	0	0.09145	0.746428	0	0
AD	ATOPIC	9	91643256	92500277	2361	288	-0.0854542	-0.36242	0.16346	0.00730242	0	0.13317	0.495997	0	0
AD	ATOPIC	9	92500278	93441050	2666	284	-0.106697	-0.33	0.1002	0.0113842	0	0.1092	0.311938	0	0
AD	ATOPIC	9	93441051	94175374	2337	288	-0.0546301	-0.29016	0.17461	0.00298445	0	0.08667	0.629198	0	0
AD	ATOPIC	9	94924483	95854925	2433	218	0.208087	-0.10413	0.62577	0.0433001	0	0.40101	0.175422	0	0
AD	ATOPIC	9	104222849	105043411	3006	295	0.116375	-0.1287	0.40046	0.0135432	0	0.16114	0.345616	0	0
AD	ATOPIC	9	105846546	107061019	4386	289	-0.169836	-0.58412	0.12109	0.0288441	0	0.34181	0.236801	0	0
AD	ATOPIC	9	107061020	108203095	3898	345	-0.0469889	-0.29985	0.19364	0.00220796	0	0.09663	0.691055	0	0
[truncated: 5,697 more rows]

[truncated: 10 more sheets: Table S9, Table S10, Table S11, Table S12, Table S13, Table S14, Table S15, Table S16, Table S17, Table S18]
